# Supplementary material for: Novel Indoline Spiropyrans Based on Human Hormones β-Estradiol and Estrone: Synthesis, Structure, Chromogenic and Cytotoxic Properties
Source: MDPI journal article supplement (doi:10.3390/molecules28093866), 2023-05-04
Supplement: s1 [file s1]

Supplementary Materials for the article:

**Novel Indoline Spiopyrans Based on Human Hormones  $\beta$ -Estradiol and Estrone: Synthesis, Structure, Chromogenic and Cytotoxic Properties**

Ilya V. Ozhogin <sup>1,\*</sup>, Artem D. Pugachev <sup>1</sup>, Nadezhda I. Makarova <sup>1</sup>, Anna A. Belanova <sup>2</sup>, Anastasia S. Kozlenko <sup>1</sup>, Irina A. Rostovtseva <sup>1</sup>, Peter V. Zolotukhin <sup>2</sup>, Oleg P. Demidov <sup>3</sup>, Islam M. El-Sewify <sup>4</sup>, Gennady S. Borodkin <sup>1</sup>, Anatoly V. Metelitsa <sup>1</sup> and Boris S. Lukyanov <sup>1</sup>

<sup>1</sup> Institute of Physical and Organic Chemistry, Southern Federal University, 194/2 Stachka Ave., 344090 Rostov-on-Don, Russia

<sup>2</sup> Academy of Biology and Biotechnology, Southern Federal University, 194/1 Stachka Ave., 344090 Rostov-on-Don, Russia

<sup>3</sup> Faculty of Chemistry and Pharmacy, North-Caucasus Federal University, 1 Pushkina Str., 355000 Stavropol, Russia

<sup>4</sup> Department of Chemistry, Faculty of Science, Ain Shams University, Cairo 11566, Egypt

\* Correspondence: iozhogin@sfnedu.ru

**Table of contents**

|                                                                       |         |
|-----------------------------------------------------------------------|---------|
| 1. NMR spectra                                                        | 2 – 18  |
| 2. HRMS spectra                                                       | 19      |
| 3. Data of SC-XRD, Hirshfeld surface and 2D fingerprint plot analysis | 20 – 24 |
| 4. Spectral characteristics and acidochromic properties               | 24 – 25 |
| 5. DFT calculations data                                              | 26 – 52 |

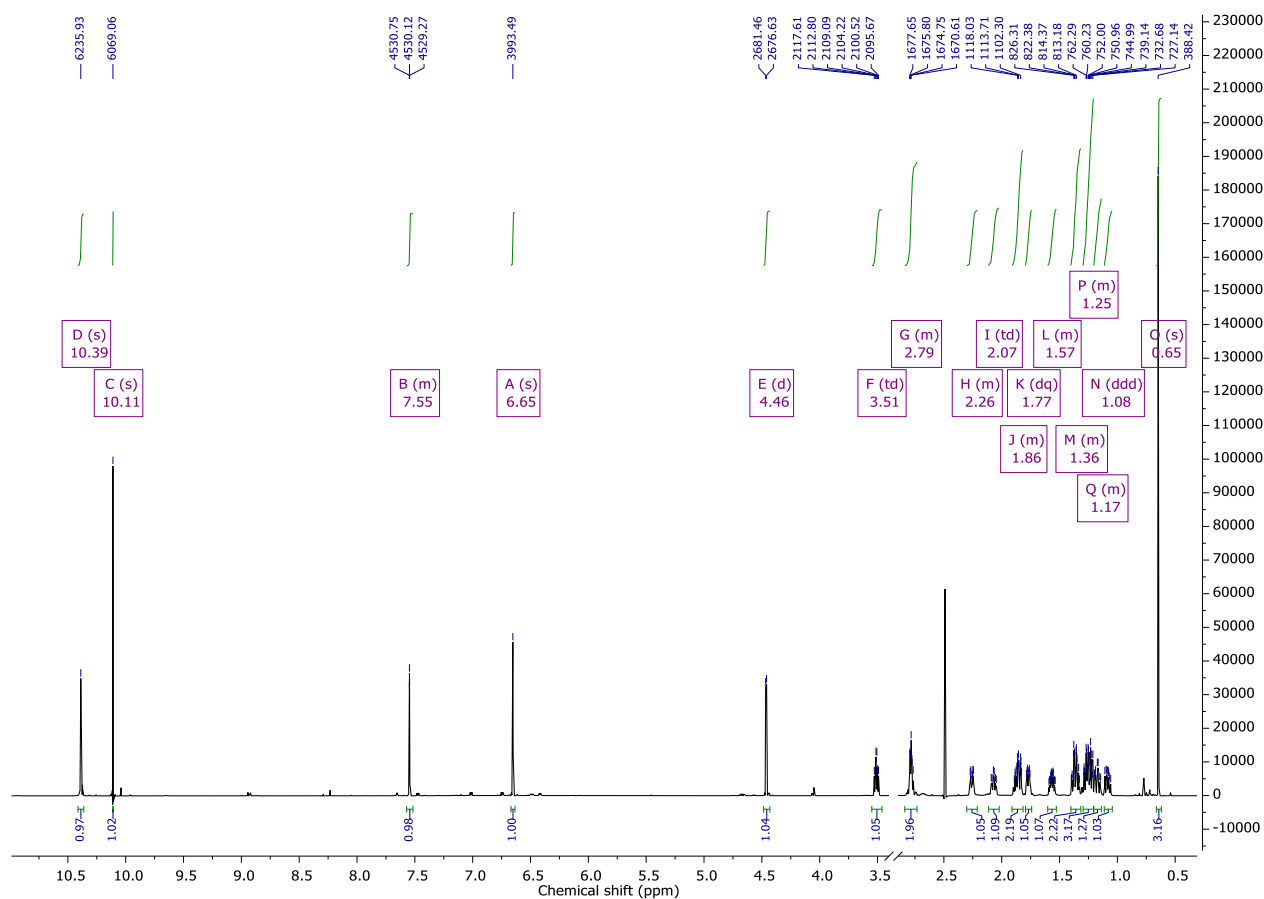

Figure S1. NMR  $^1\text{H}$  spectrum of 2-formyl- $\beta$ -estradiol (**1**).

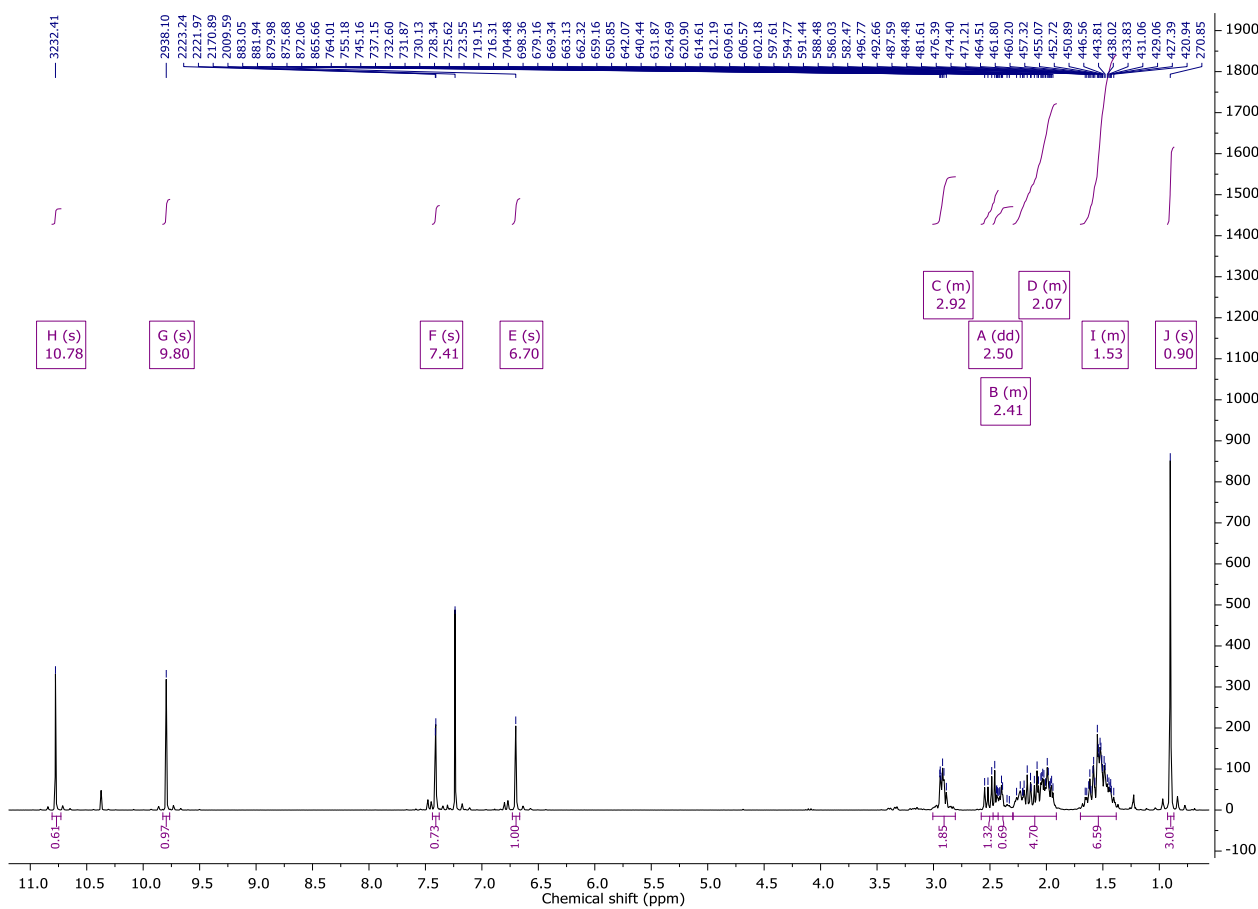

Figure S2. NMR  $^1\text{H}$  spectrum of 2-formylestrone (**2**).

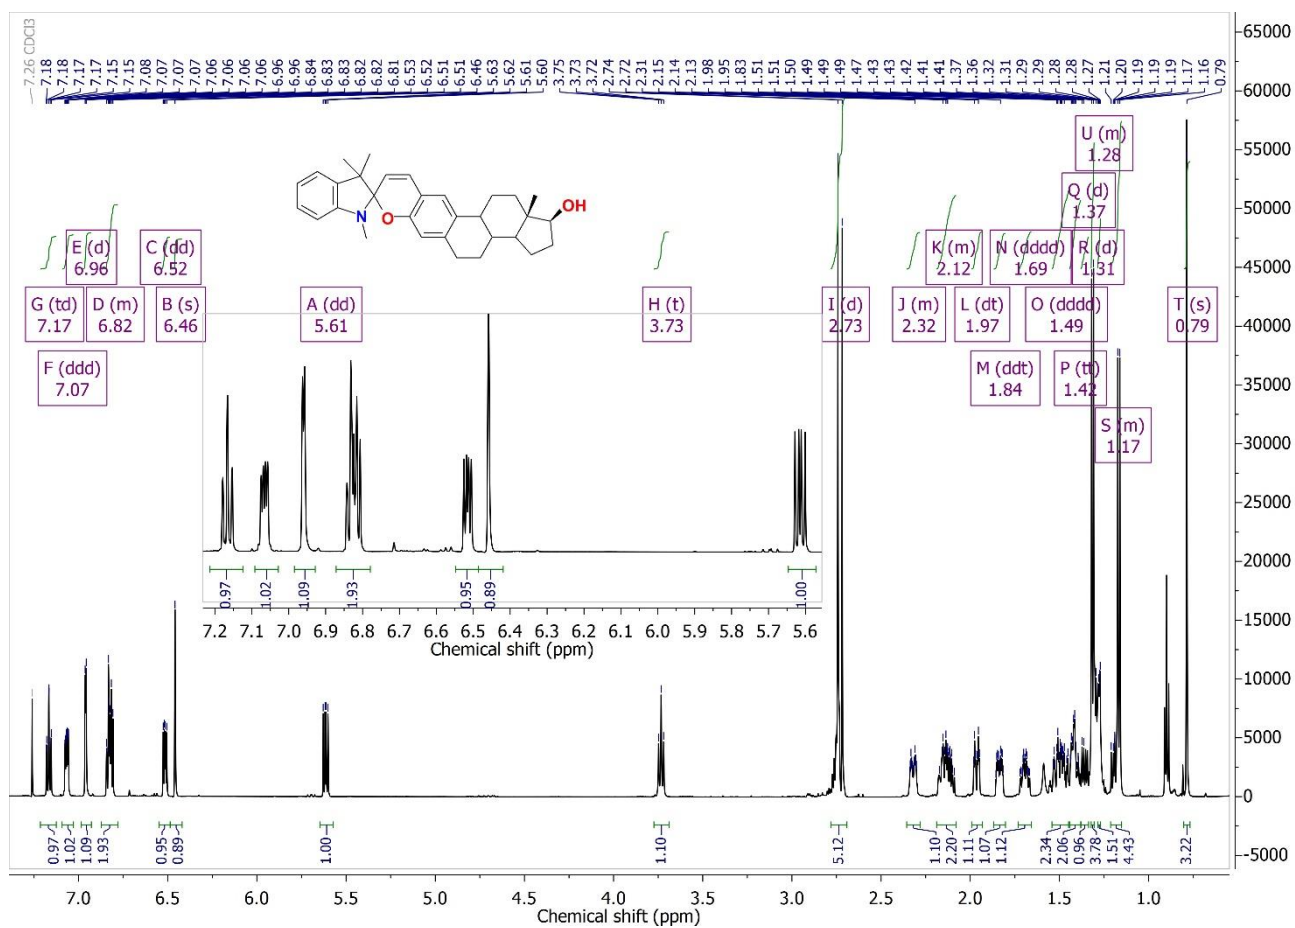

**Figure S3.** NMR  $^1\text{H}$  spectrum of SPP (3)

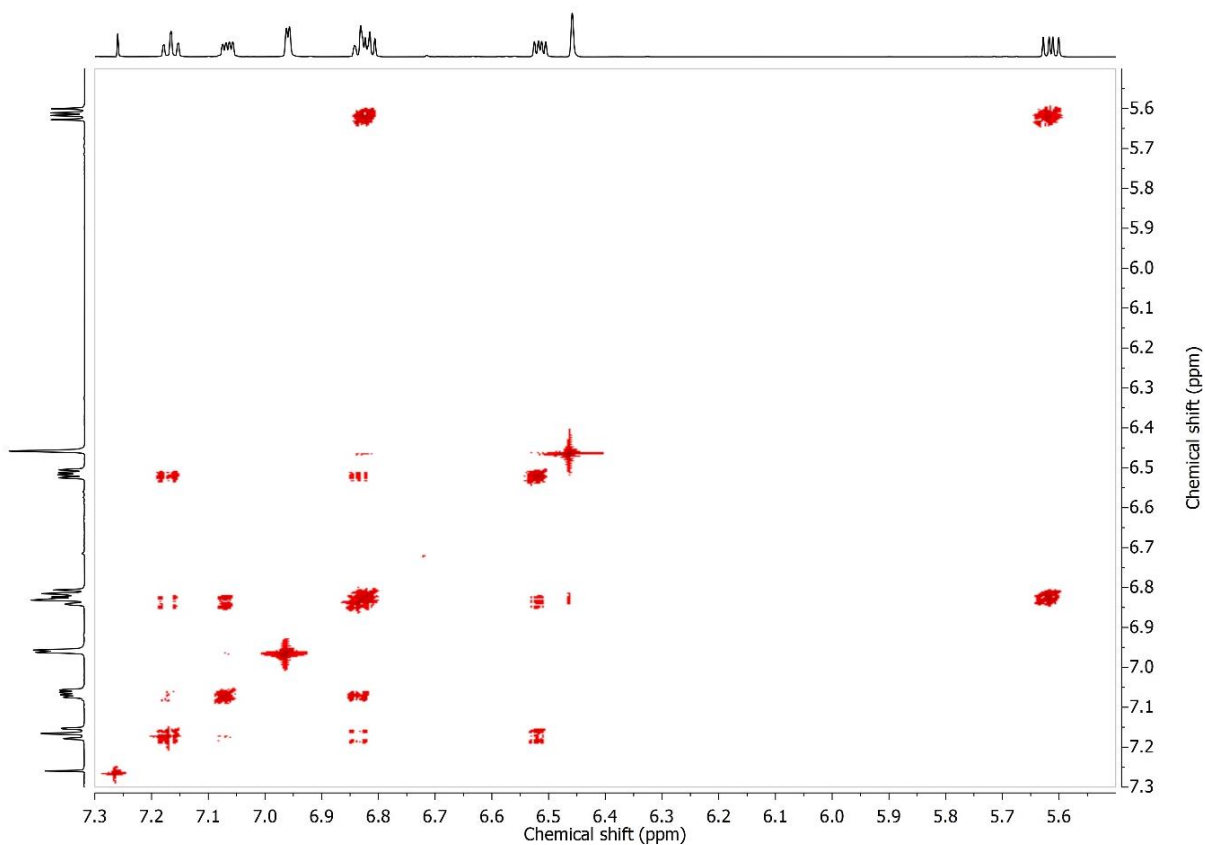

**Figure S4.** Fragment of COSY  $^1\text{H}$ - $^1\text{H}$  NMR spectrum of SPP (3), aromatic protons  
region. 3

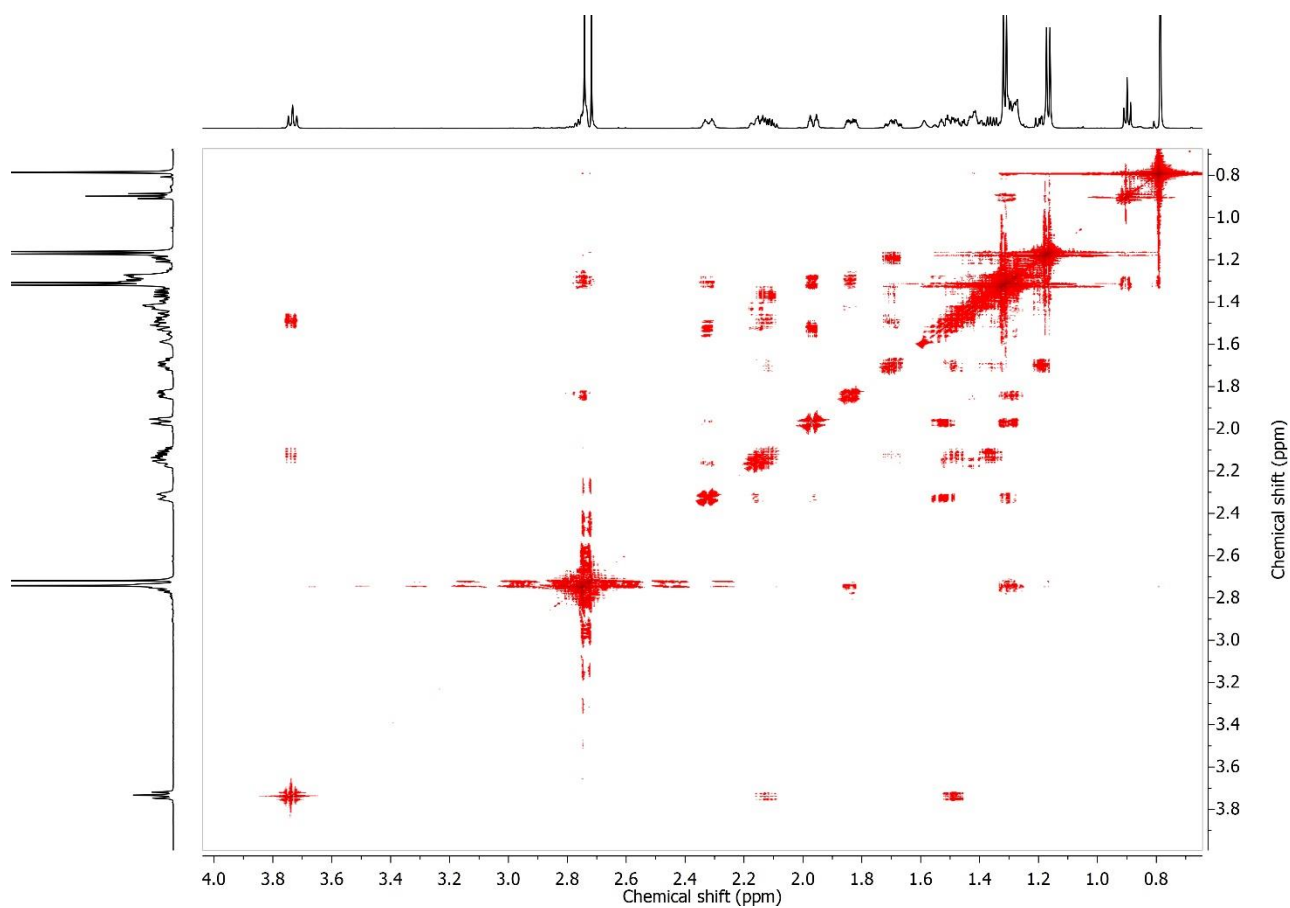

**Figure S5.** Fragment of COSY  $^1\text{H}$ - $^1\text{H}$  NMR spectrum of SPP (**3**), aliphatic protons region.

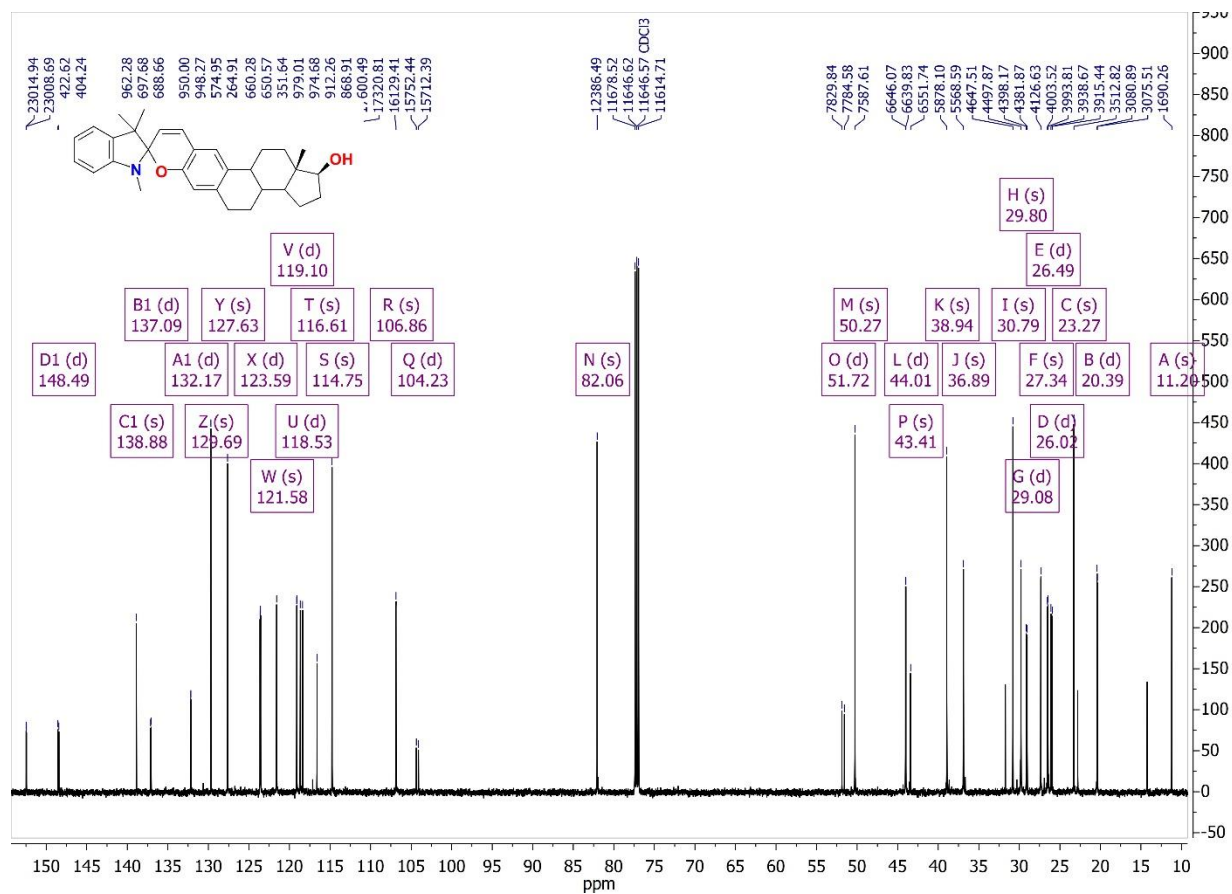

**Figure S6.** NMR  $^{13}\text{C}$  spectrum of SPP (**3**)

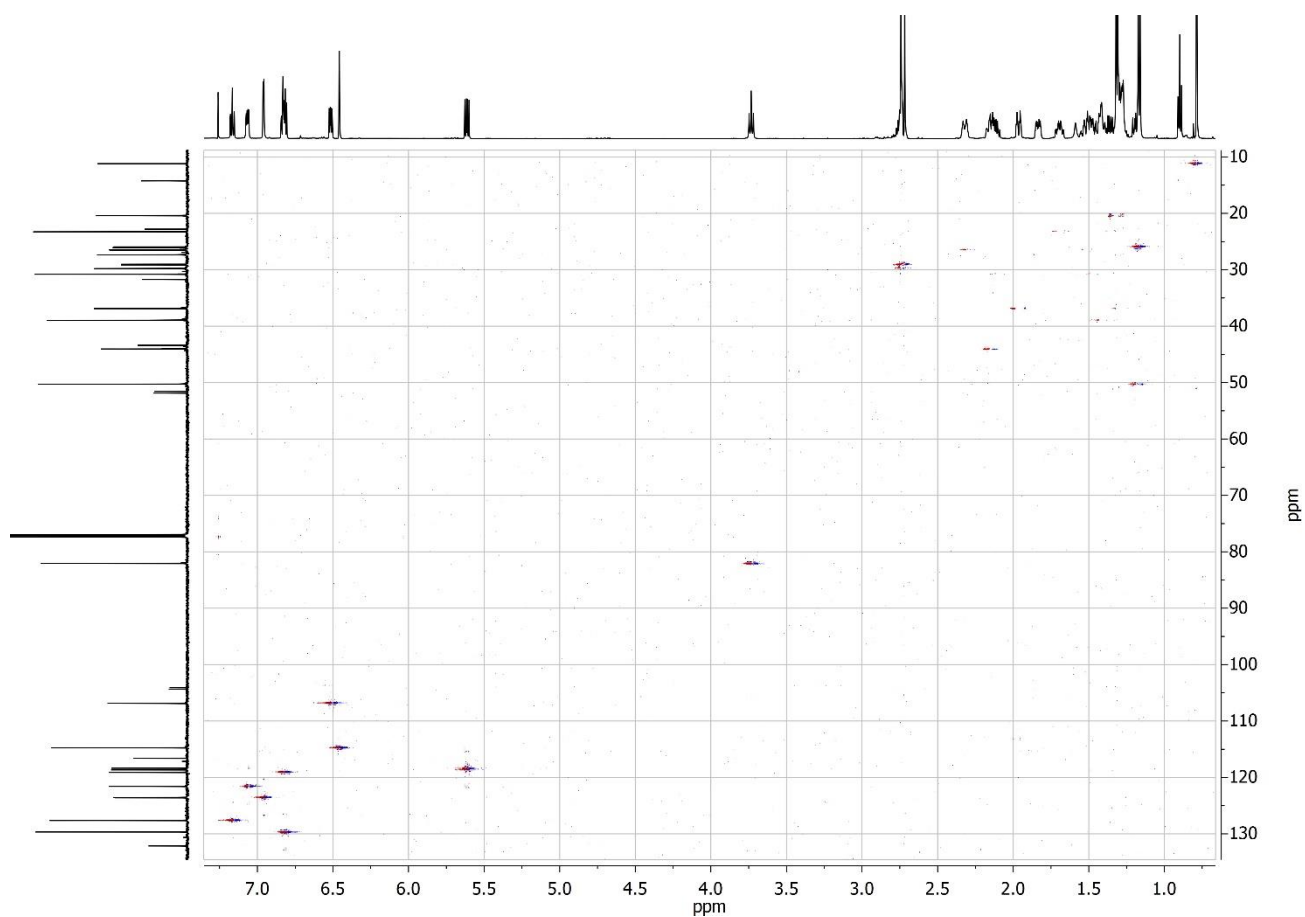

**Figure S7.** HSQC  $^1\text{H}$ - $^{13}\text{C}$  NMR spectrum of SPP (3).

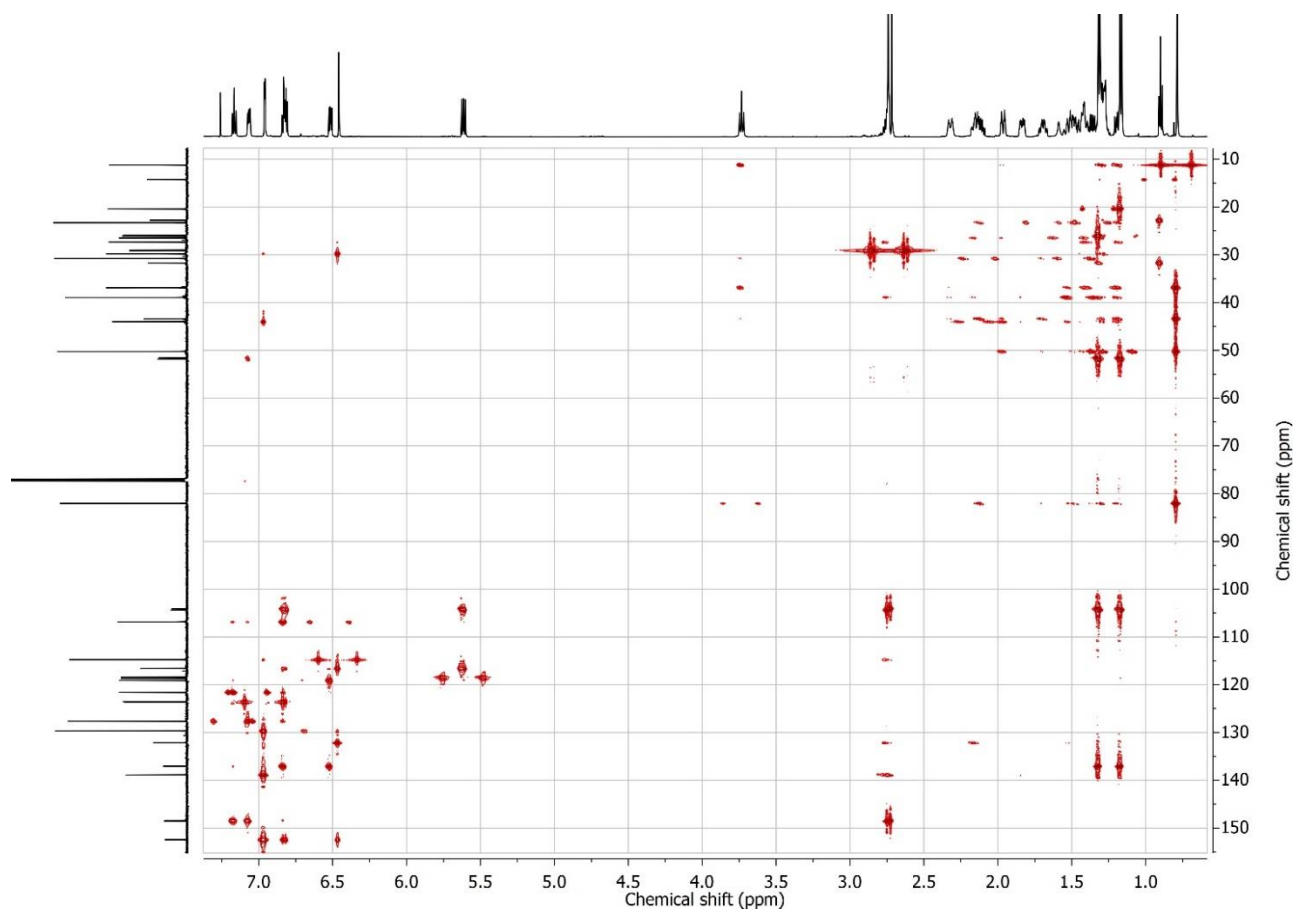

**Figure S8.** HMBC  $^1\text{H}$ - $^{13}\text{C}$  NMR spectrum of SPP

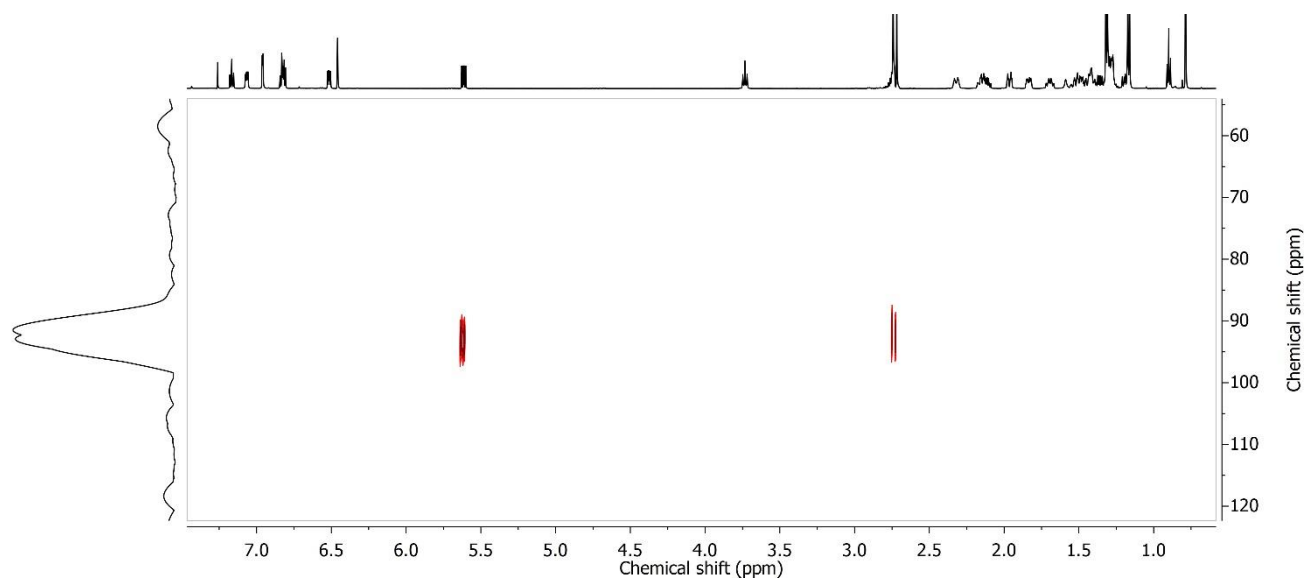

**Figure S9.** HMBC  $^1\text{H}$ - $^{15}\text{N}$  NMR spectrum of SPP (**3**).

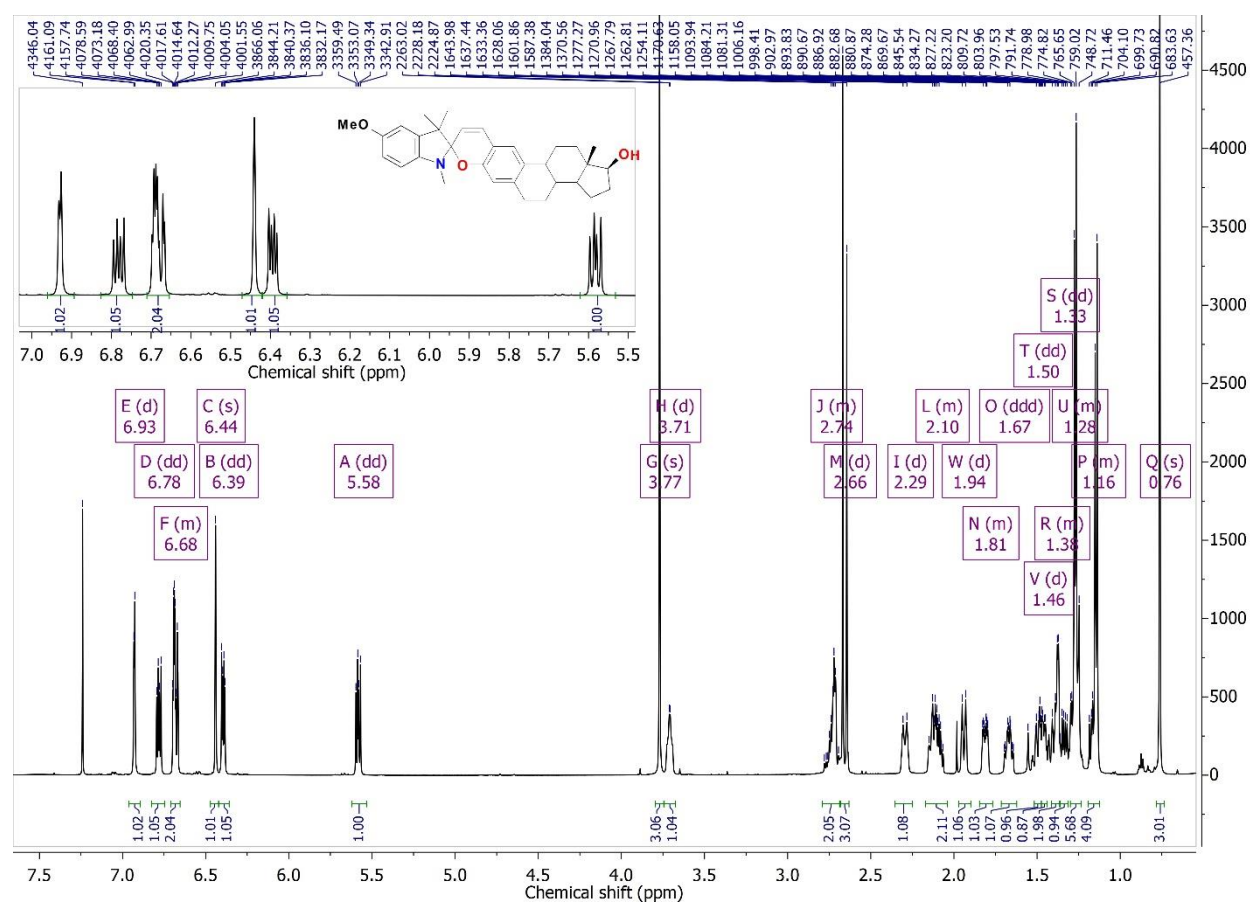

**Figure S10.** NMR  $^1\text{H}$  spectrum of SPP (**4**)

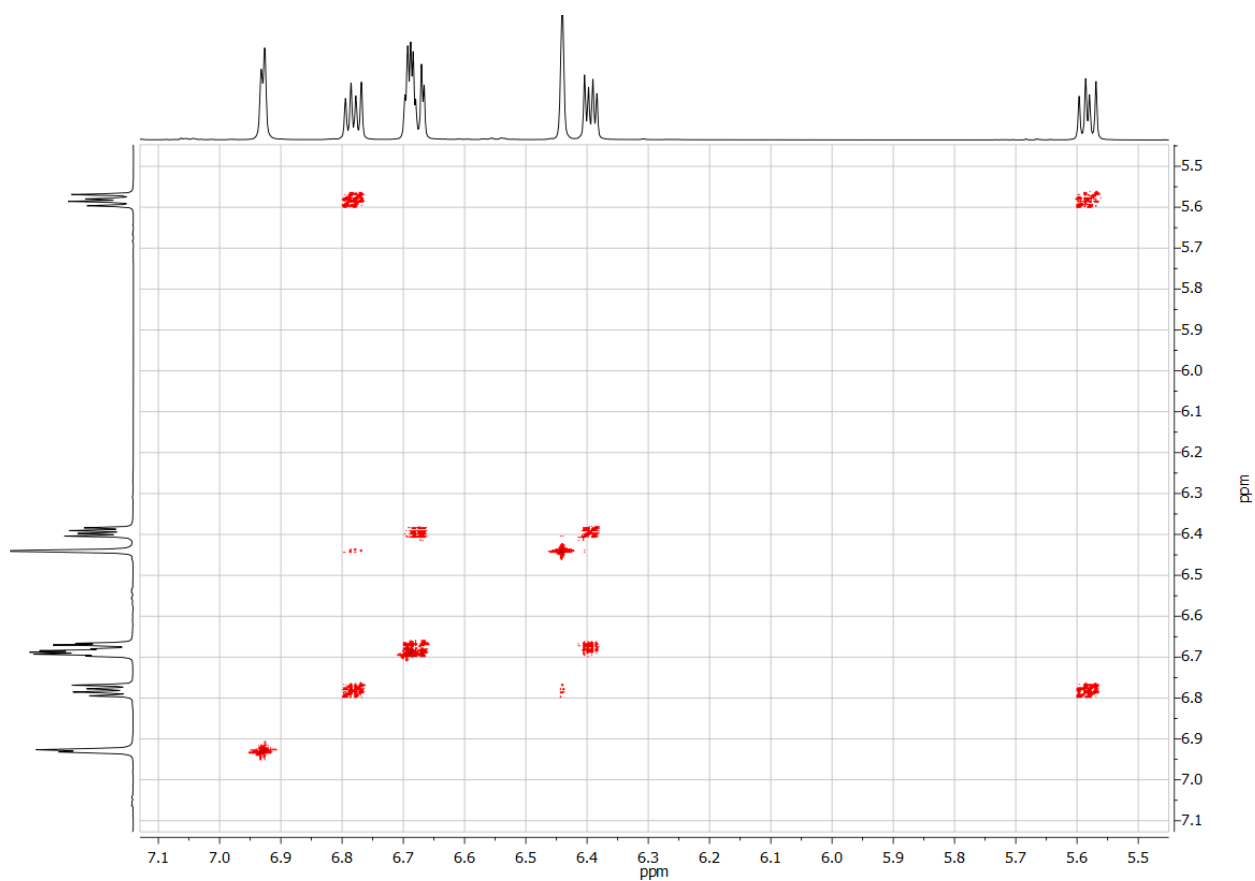

**Figure S11.** Fragment of COSY  $^1\text{H}$ - $^1\text{H}$  NMR spectrum of SPP (4), aromatic protons region.

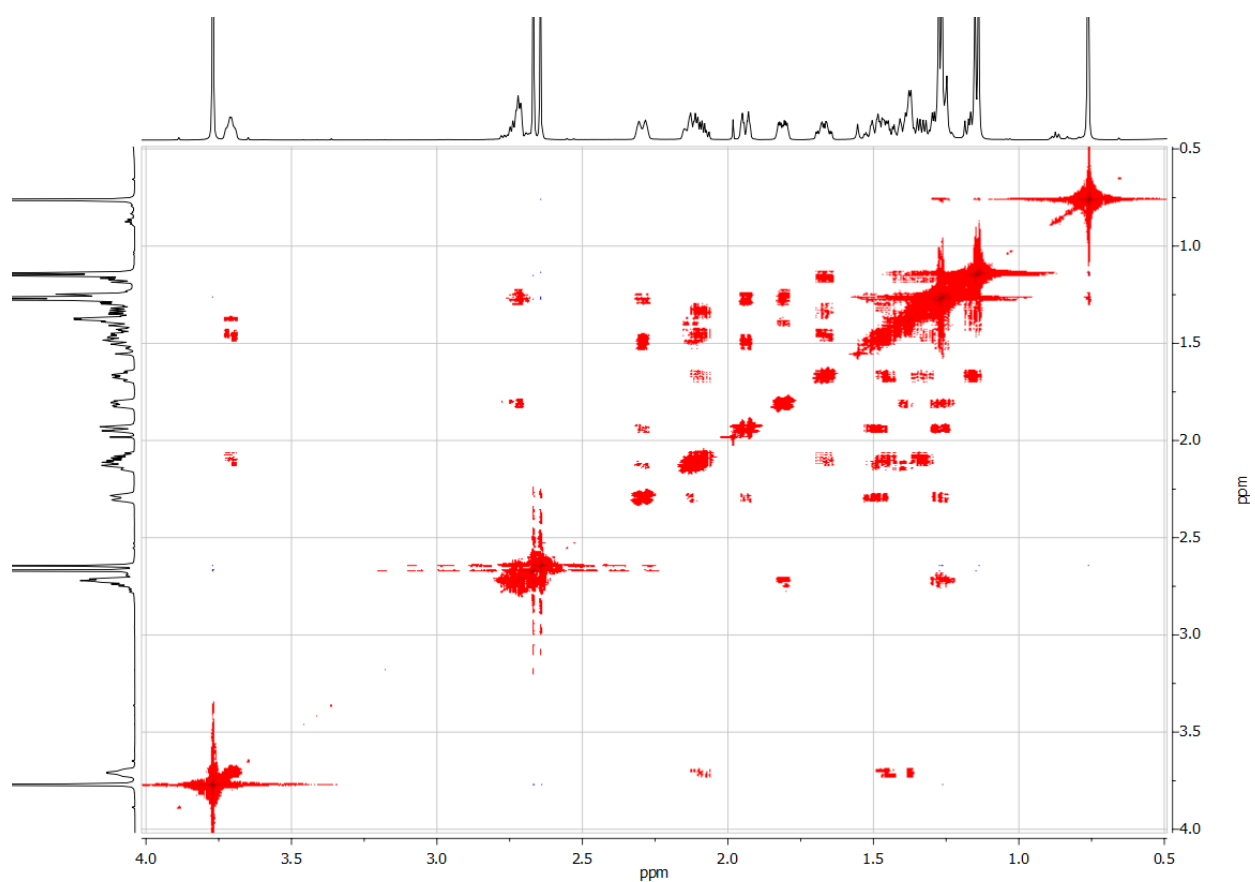

**Figure S12.** Fragment of COSY  $^1\text{H}$ - $^1\text{H}$  NMR spectrum of SPP (4), aliphatic protons region.

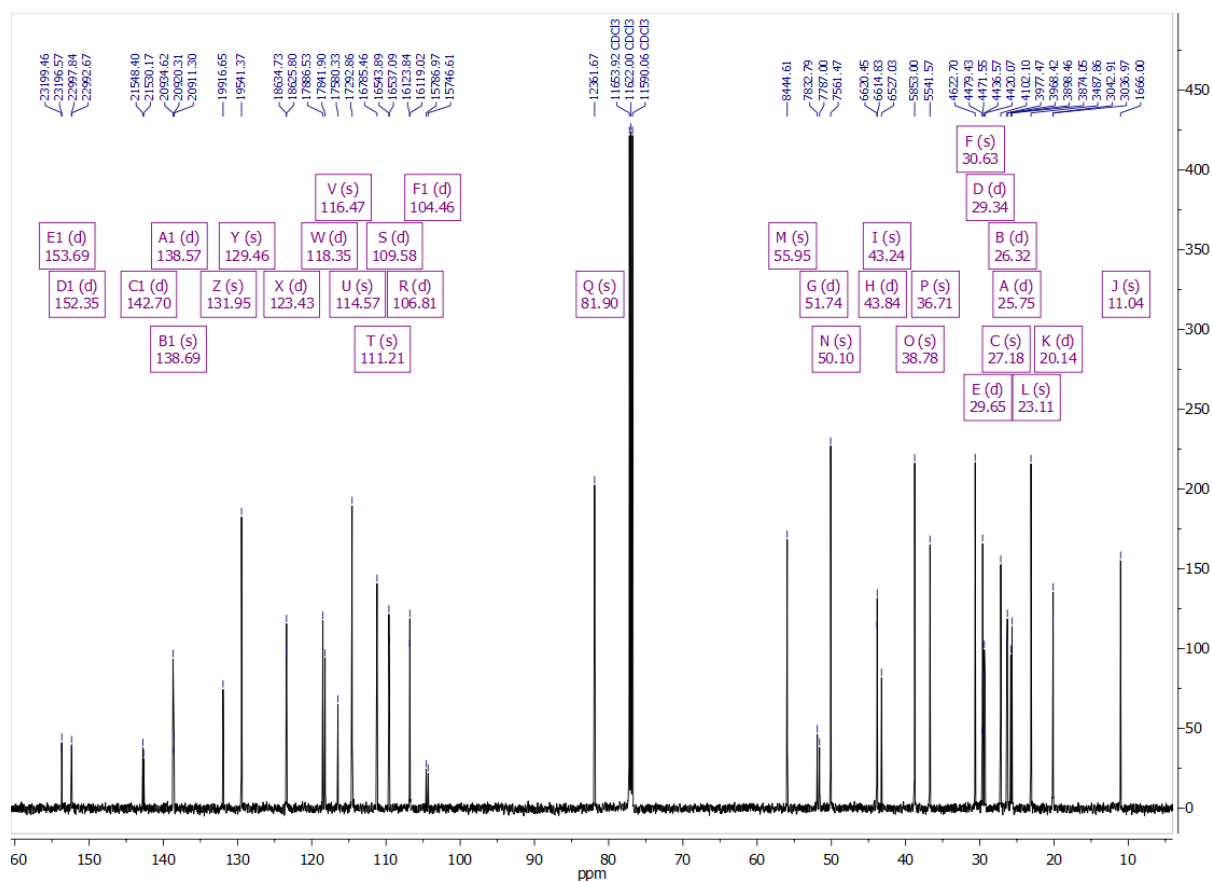

Figure S13. NMR  $^{13}\text{C}$  spectrum of SPP (4).

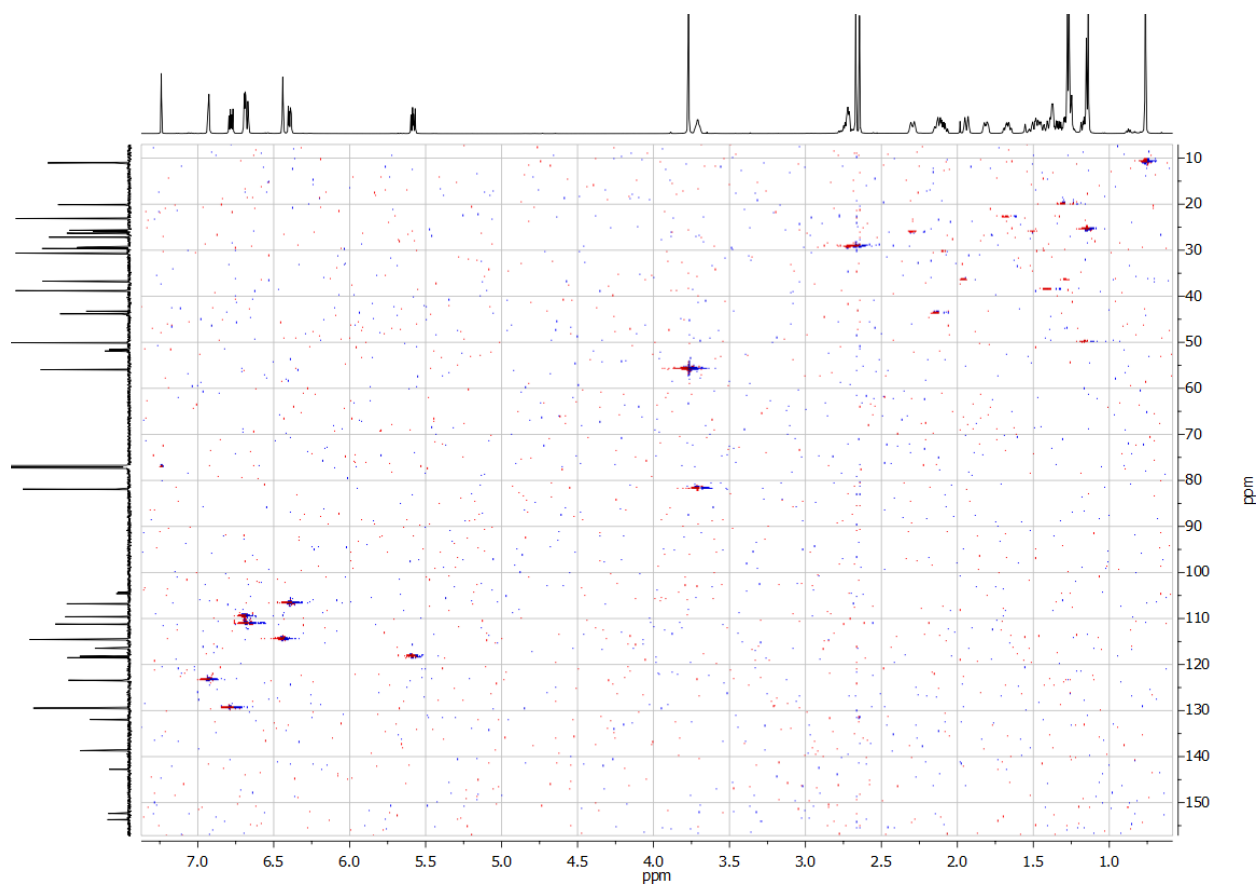

Figure S14. HSQC  $^1\text{H}$ - $^{13}\text{C}$  NMR spectrum of SPP (4).



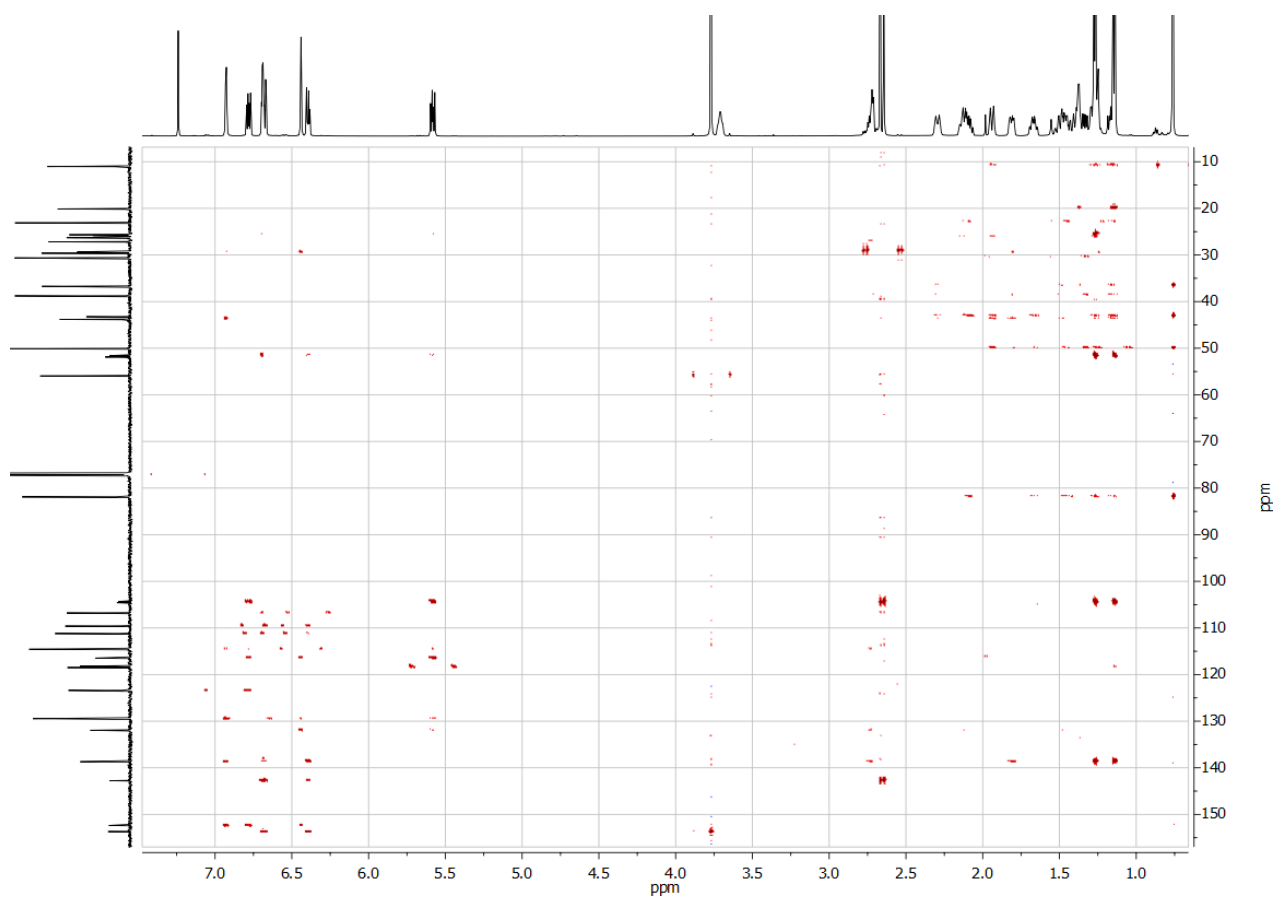

**Figure S15.** HMBC  $^1\text{H}$ - $^{13}\text{C}$  NMR spectrum of SPP (4).

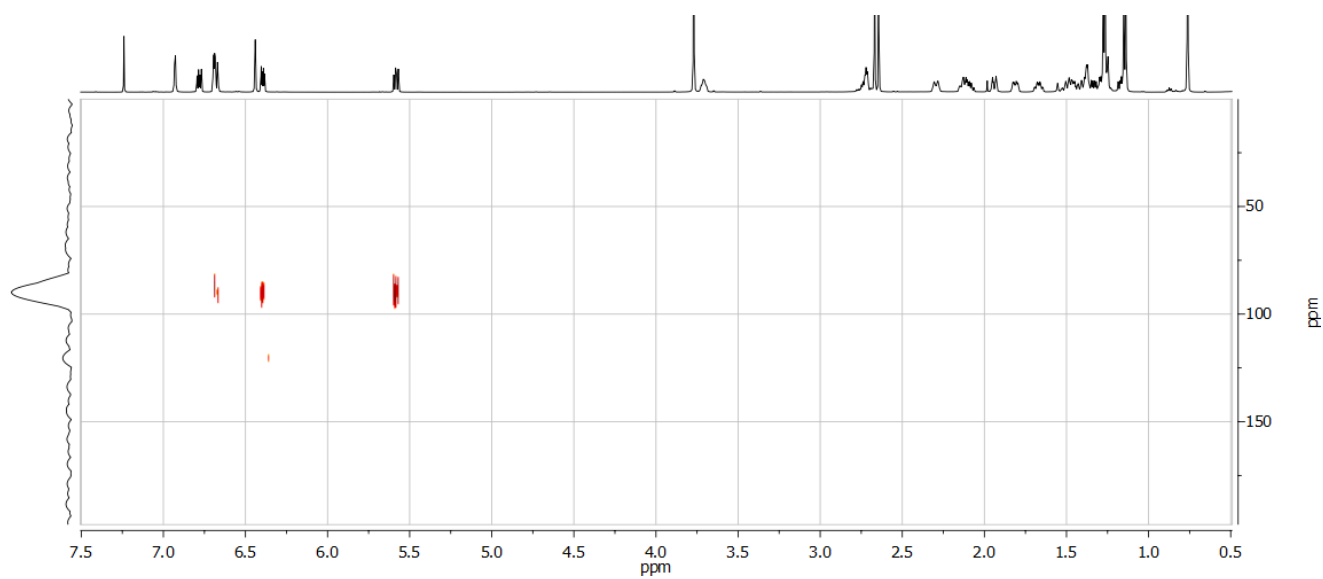

**Figure S16.** HMBC  $^1\text{H}$ - $^{15}\text{N}$  NMR spectrum of SPP (4).

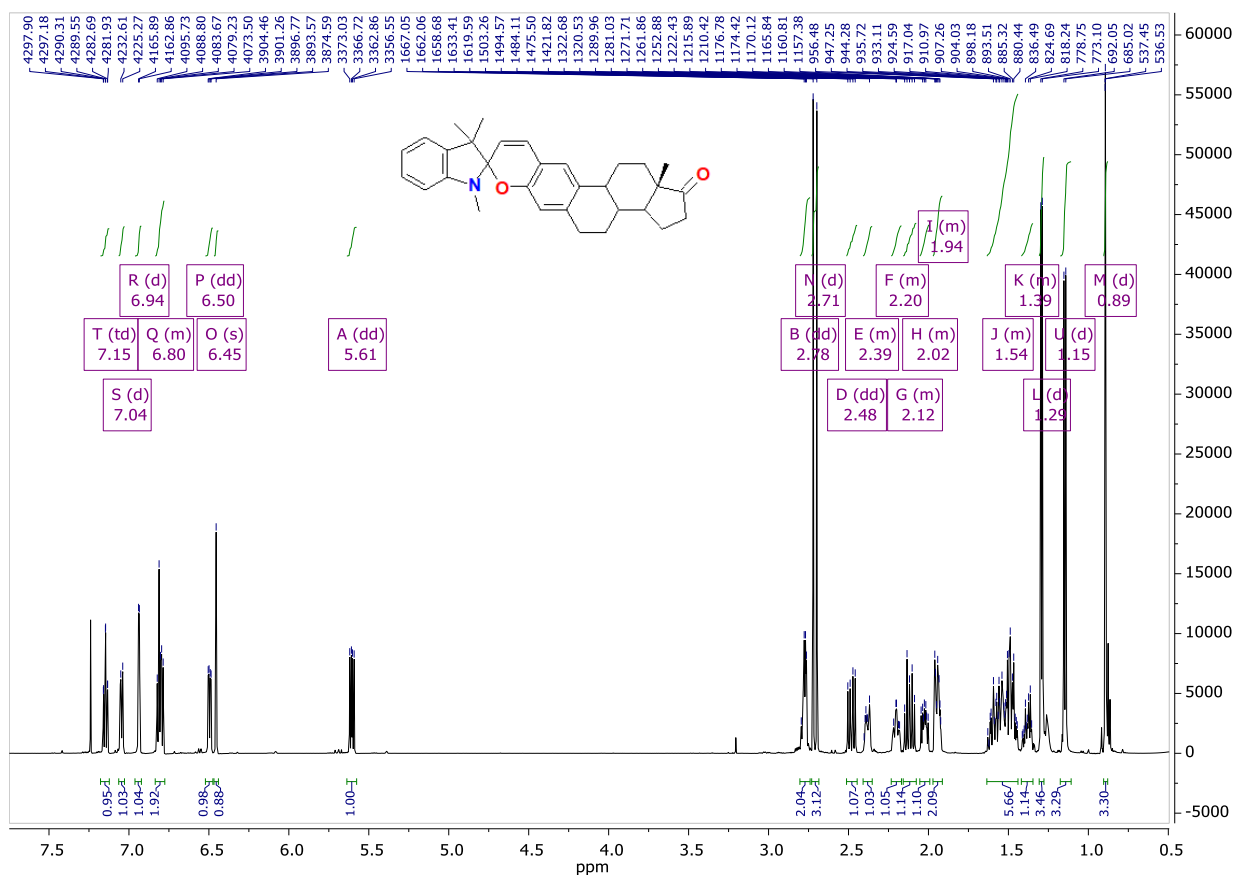

Figure S17. NMR  $^1\text{H}$  spectrum of SPP (5).

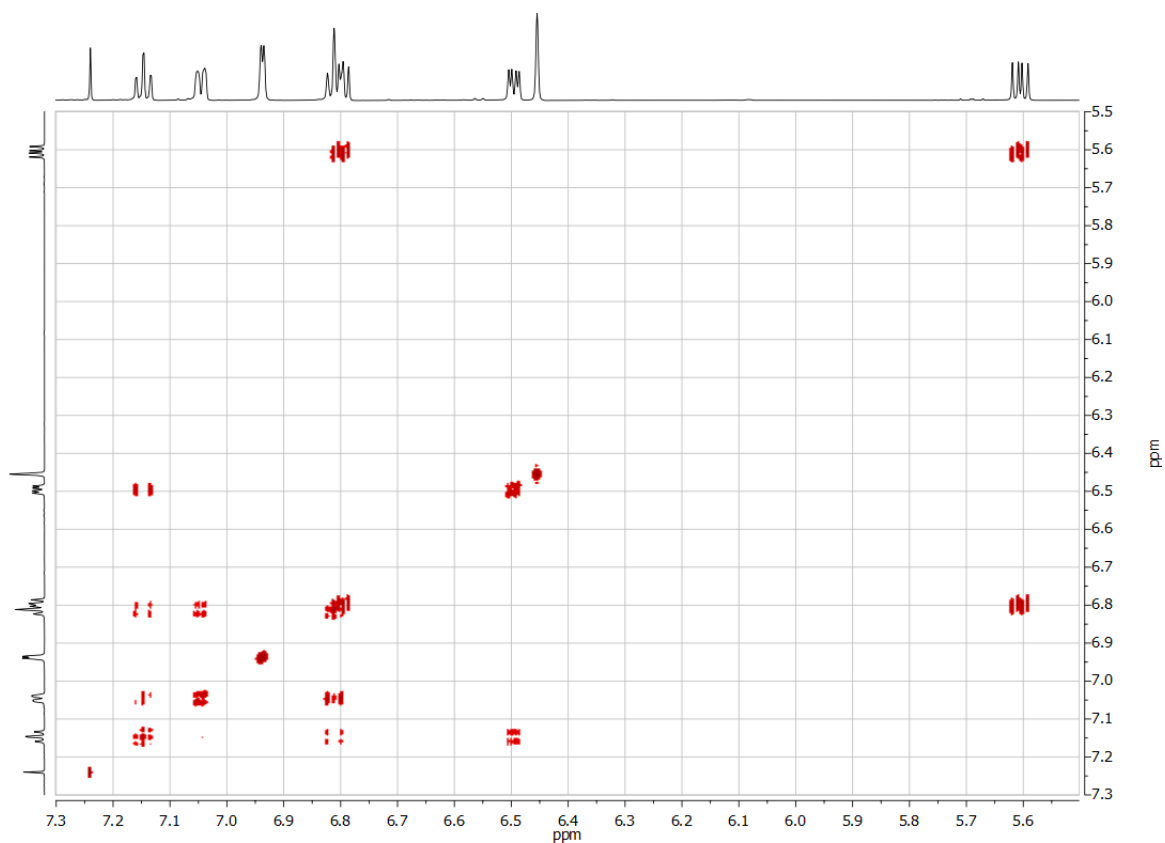

Figure S18. Fragment of COSY  $^1\text{H}$ - $^1\text{H}$  NMR spectrum of SPP (5), aromatic protons region.

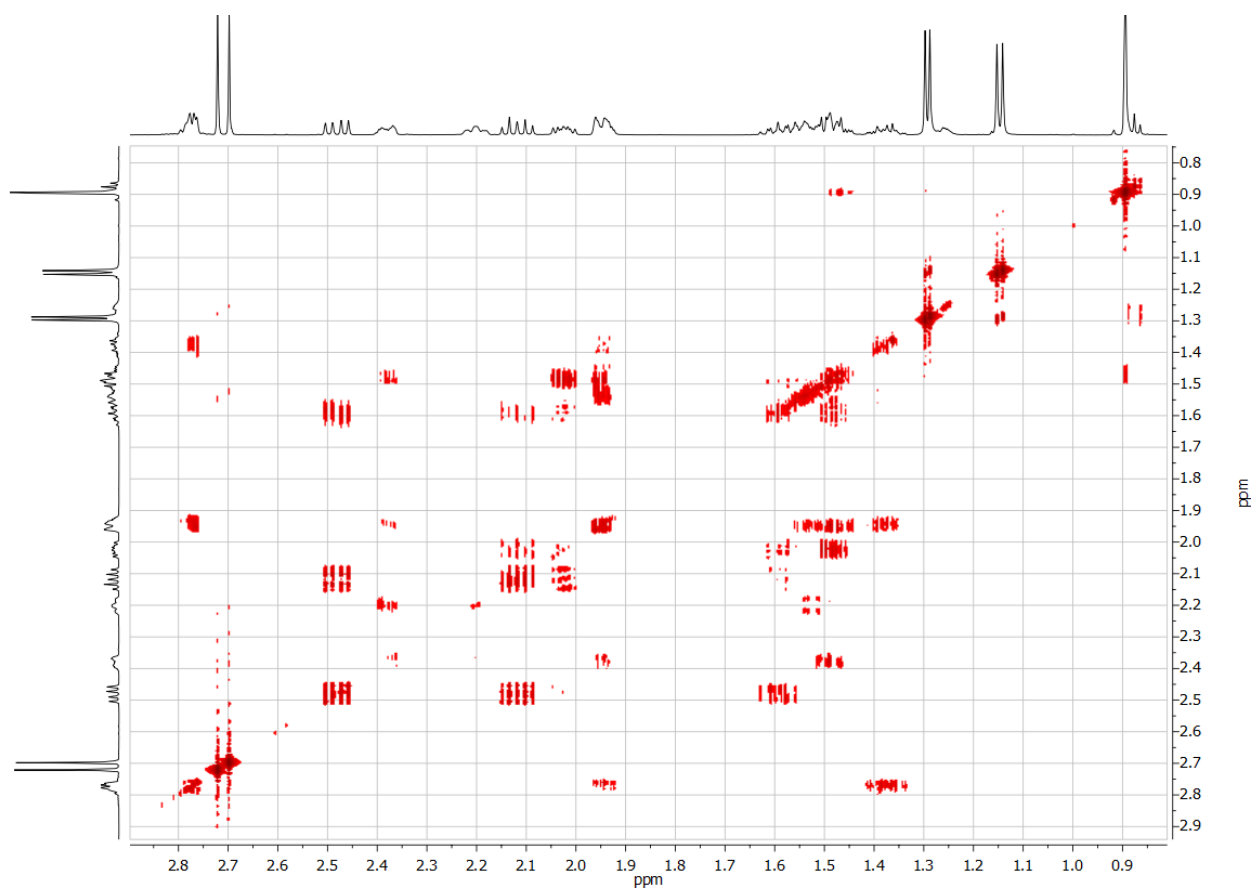

Figure S19. Fragment of COSY  $^1\text{H}$ - $^1\text{H}$  NMR spectrum of SPP (5), aliphatic protons region.

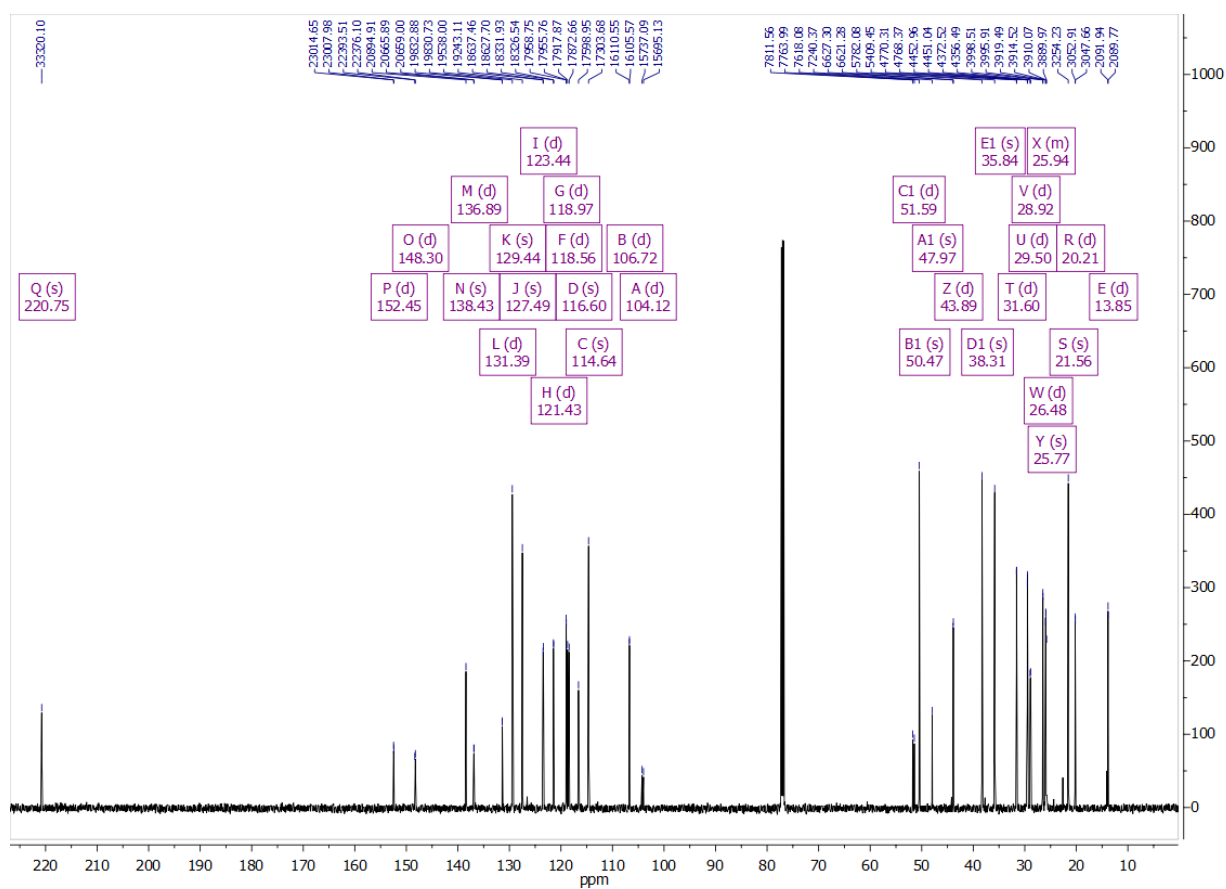

Figure S20. NMR  $^{13}\text{C}$  spectrum of SPP (5).

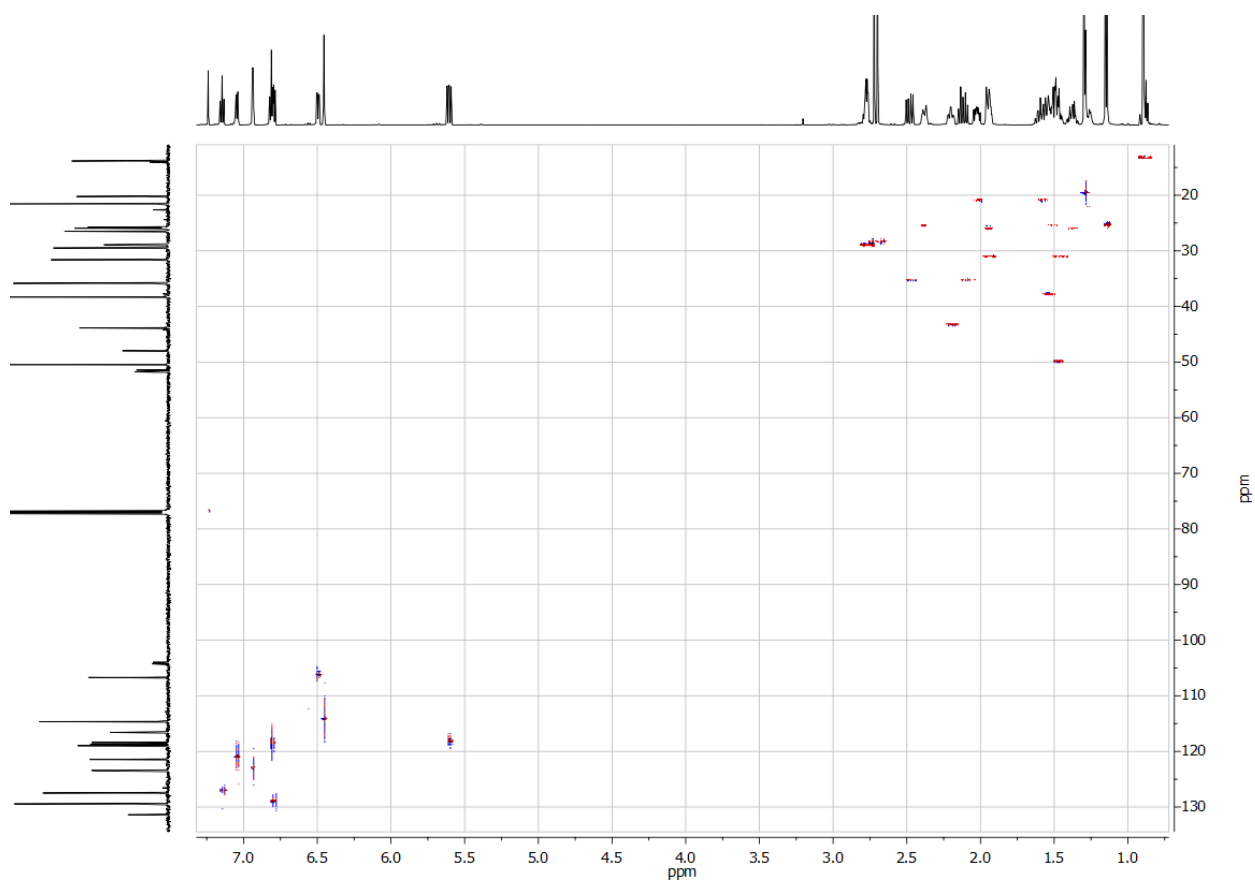

**Figure S21.** HSQC  $^1\text{H}$ - $^{13}\text{C}$  NMR spectrum of SPP (5).

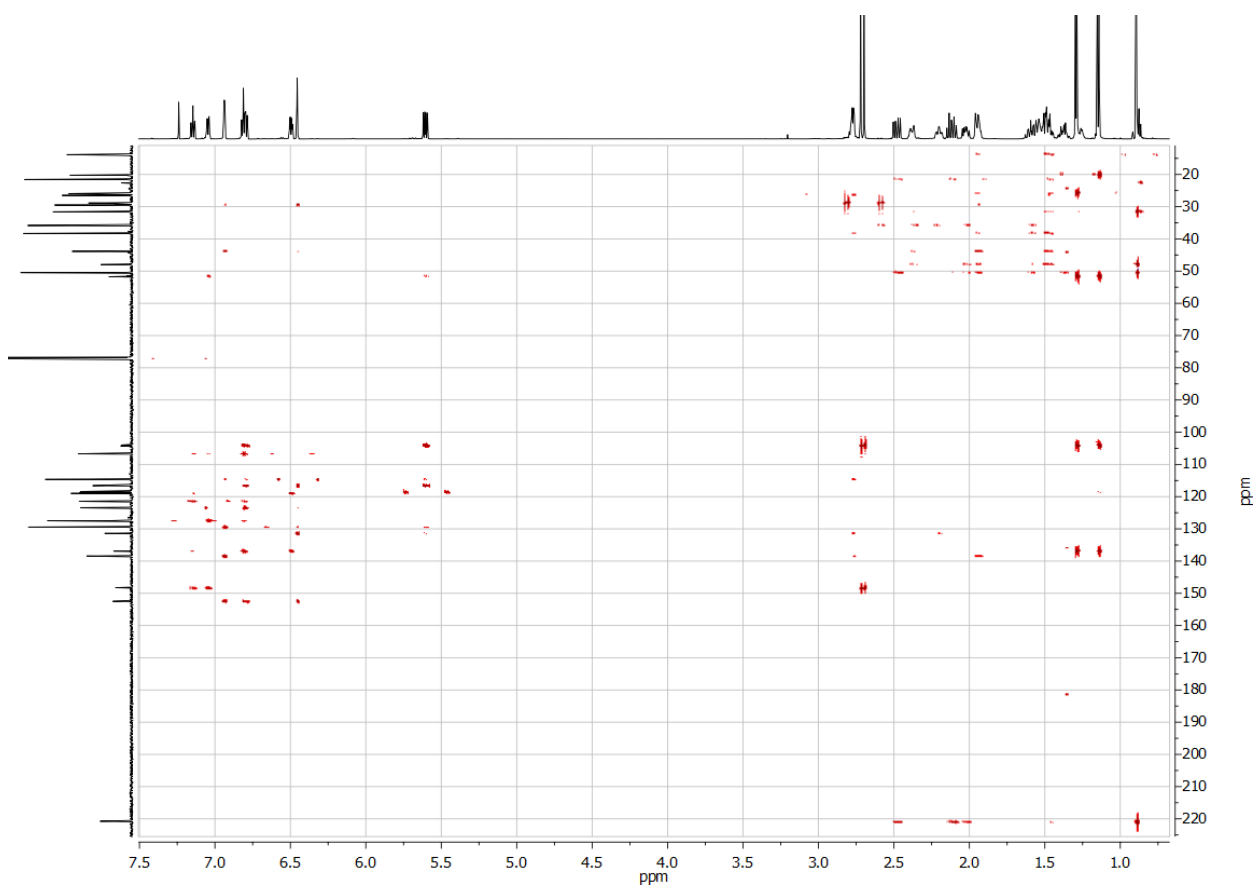

**Figure S22.** HMBC  $^1\text{H}$ - $^{13}\text{C}$  NMR spectrum of SPP (5).

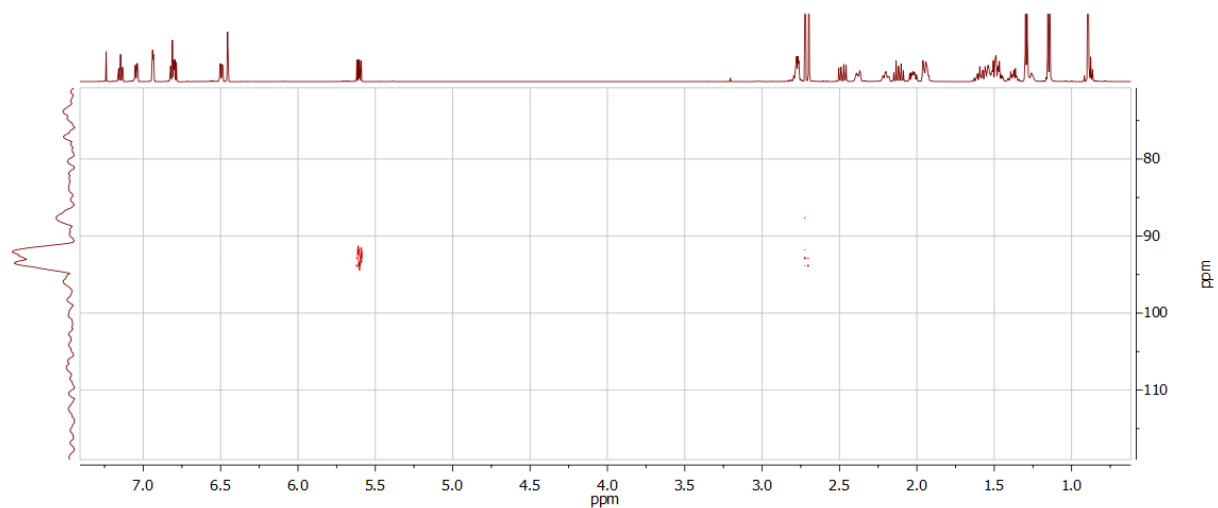

**Figure S23.** HMBC  $^1\text{H}$ - $^{15}\text{N}$  NMR spectrum of SPP (5).

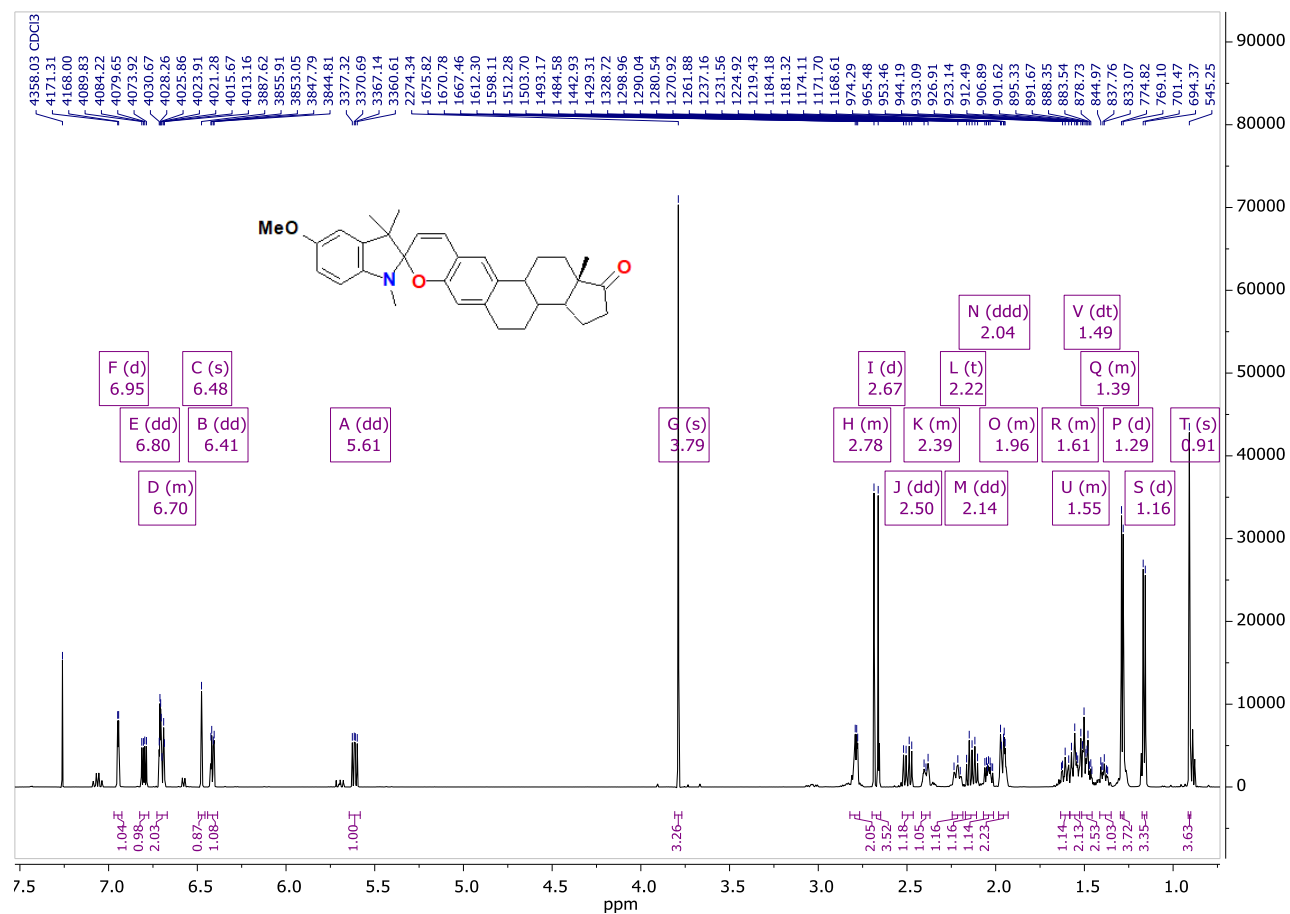

**Figure S24.** NMR  $^1\text{H}$  spectrum of SPP (6).

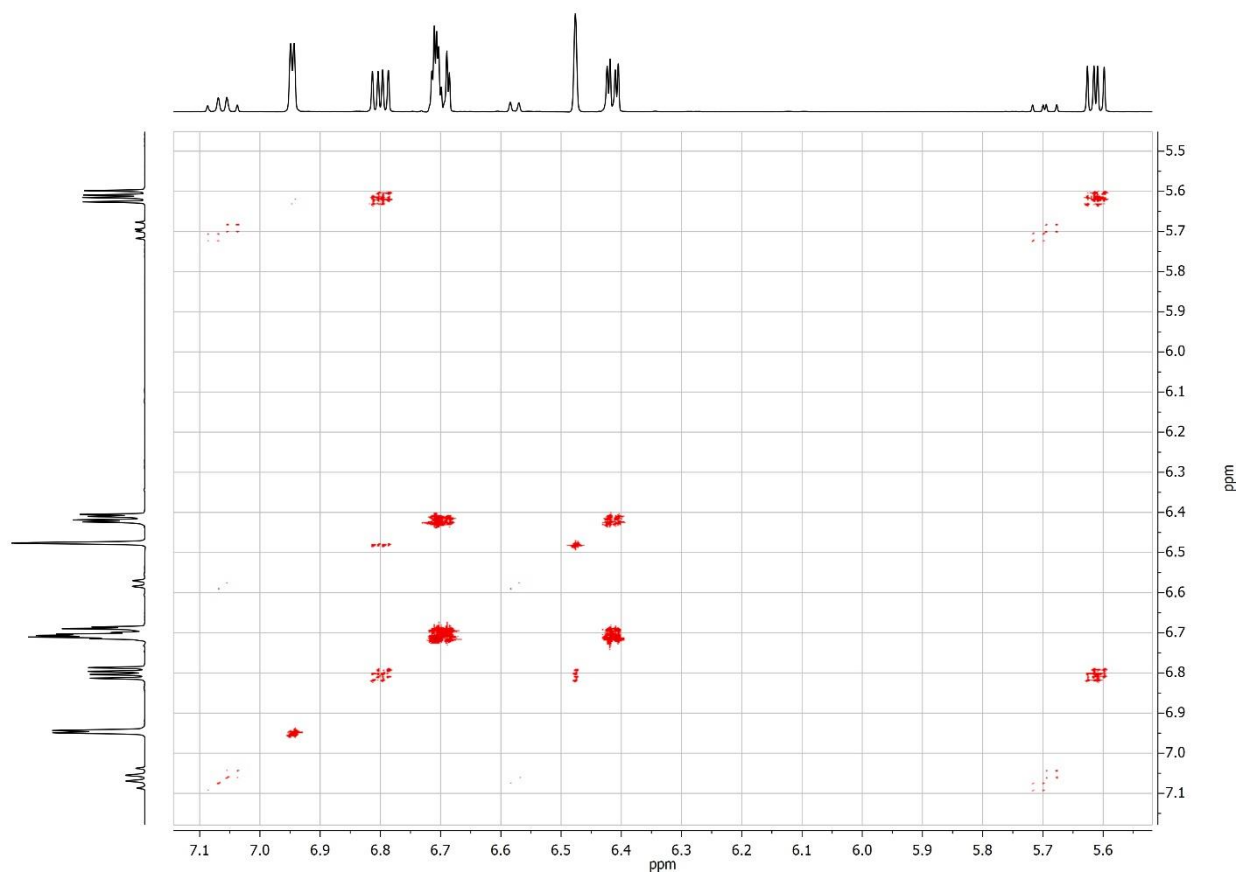

**Figure S25.** Fragment of COSY  $^1\text{H}$ - $^1\text{H}$  NMR spectrum of SPP (6), aromatic protons region.

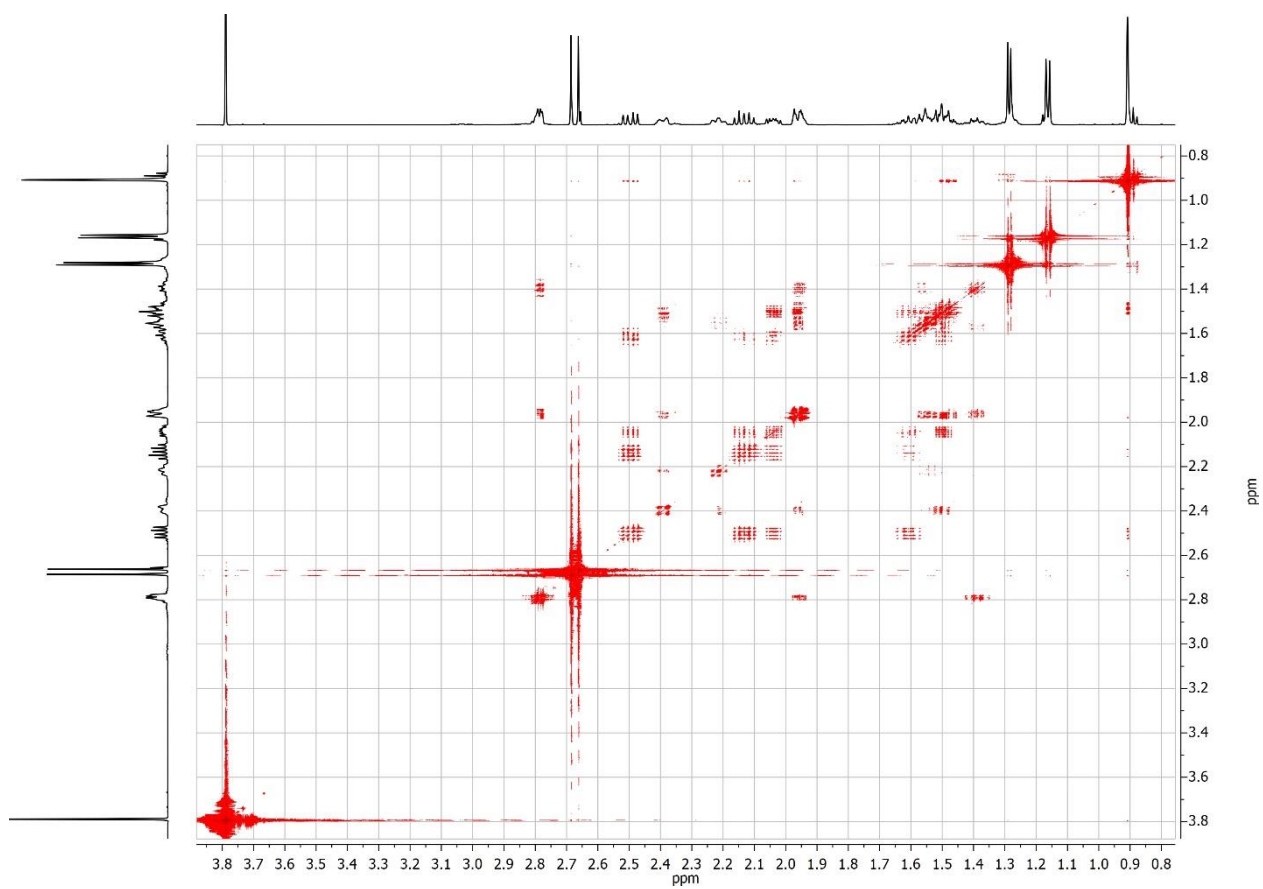

**Figure S26.** Fragment of COSY  $^1\text{H}$ - $^1\text{H}$  NMR spectrum of SPP (6), aliphatic protons region.

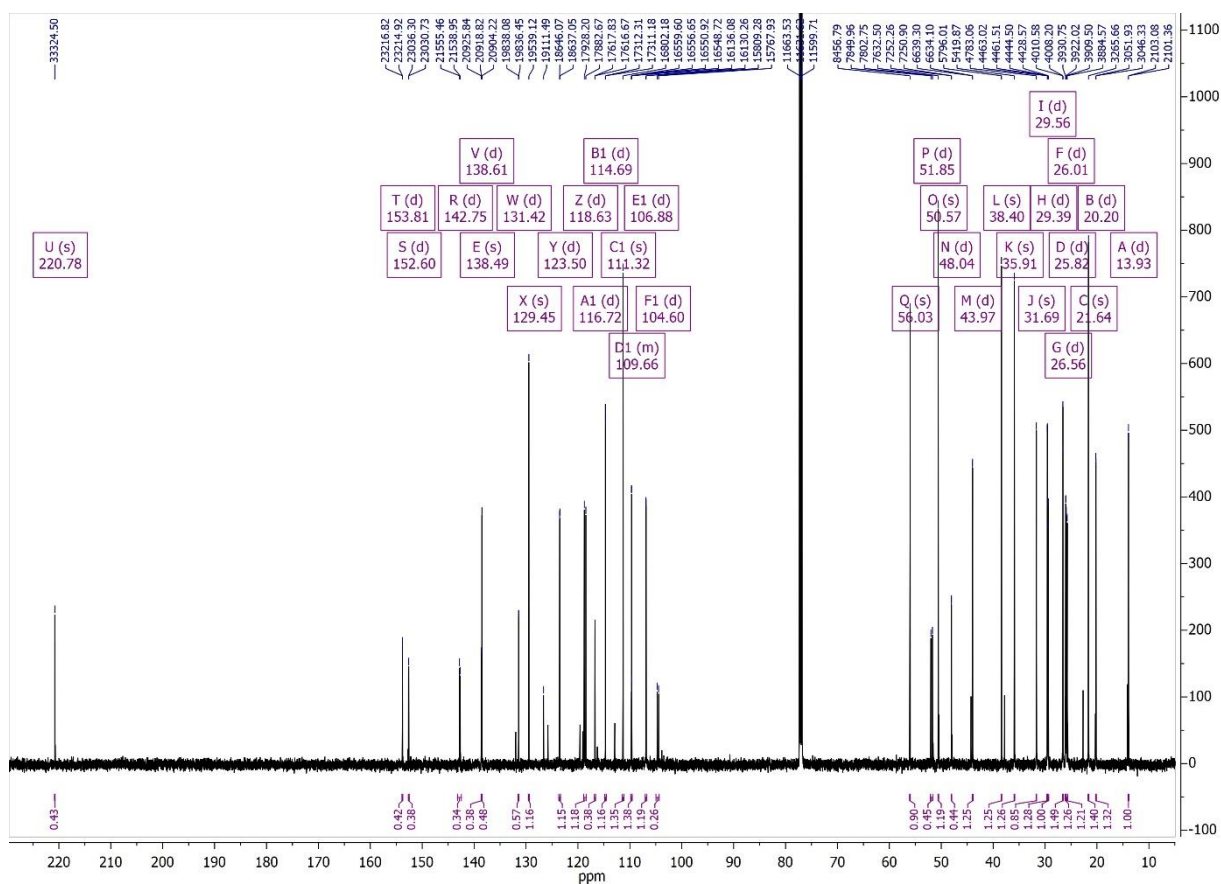

Figure S27. NMR  $^{13}\text{C}$  spectrum of SPP (6).

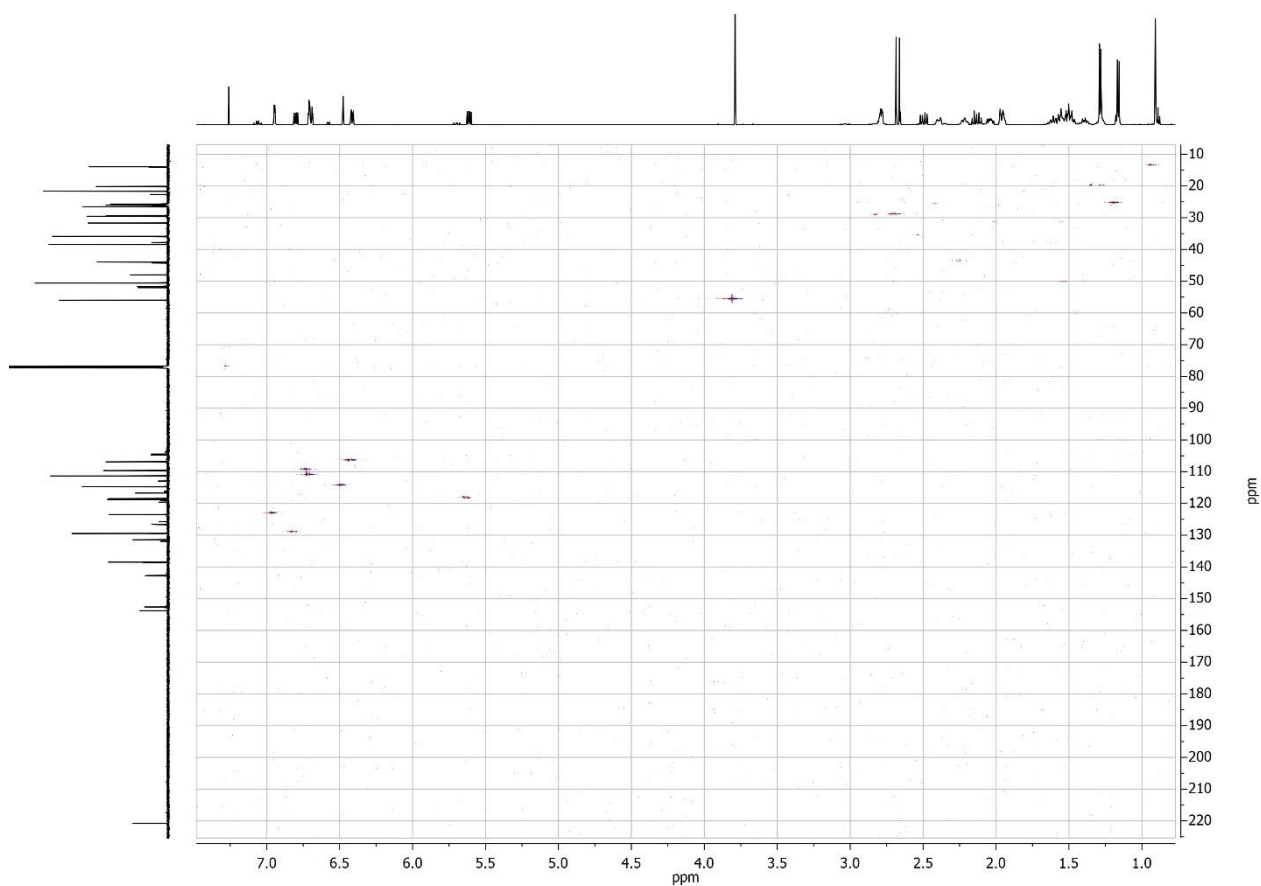

Figure S28. HSQC  $^1\text{H}$ - $^{13}\text{C}$  NMR spectrum of SPP (6).

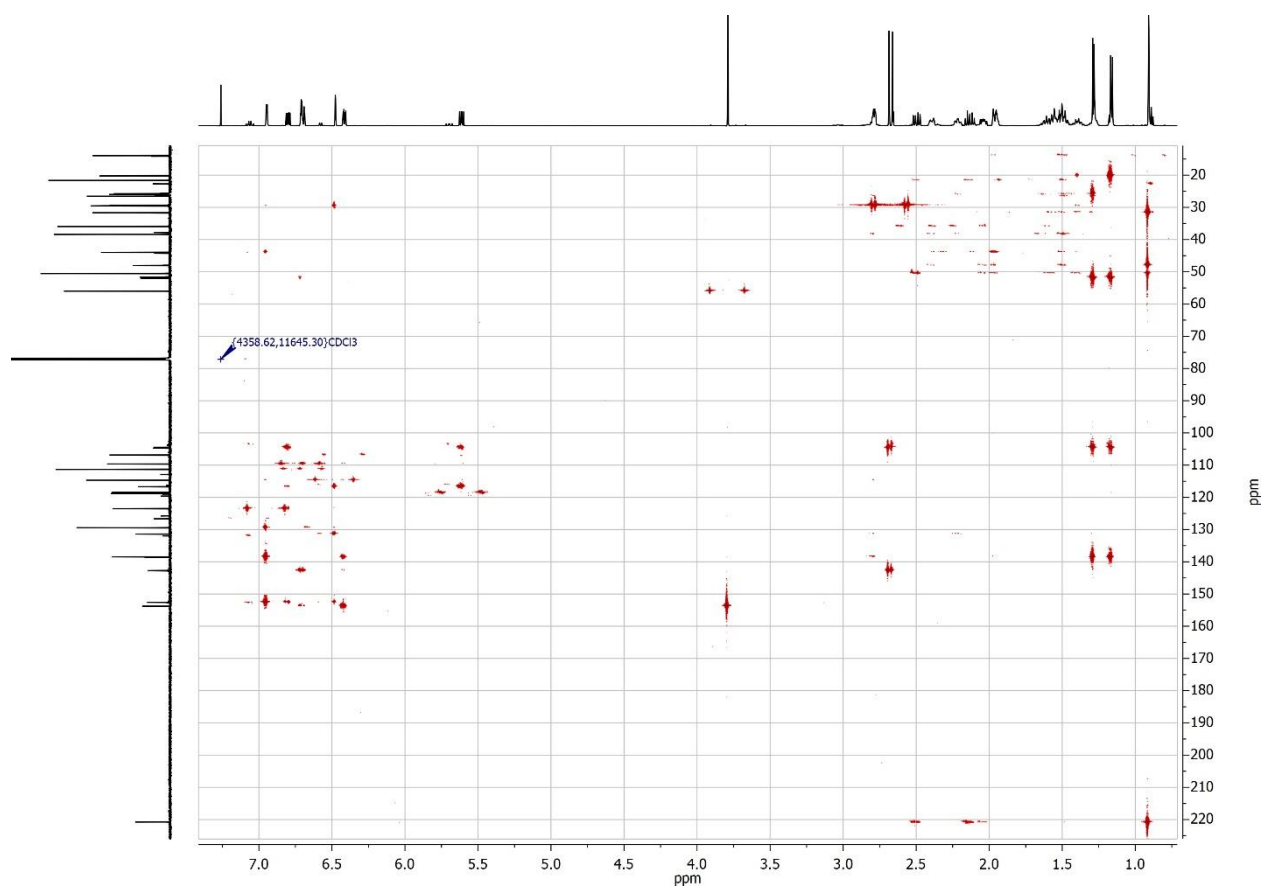

**Figure S29.** HMBC  $^1\text{H}$ - $^{13}\text{C}$  NMR spectrum of SPP (6).

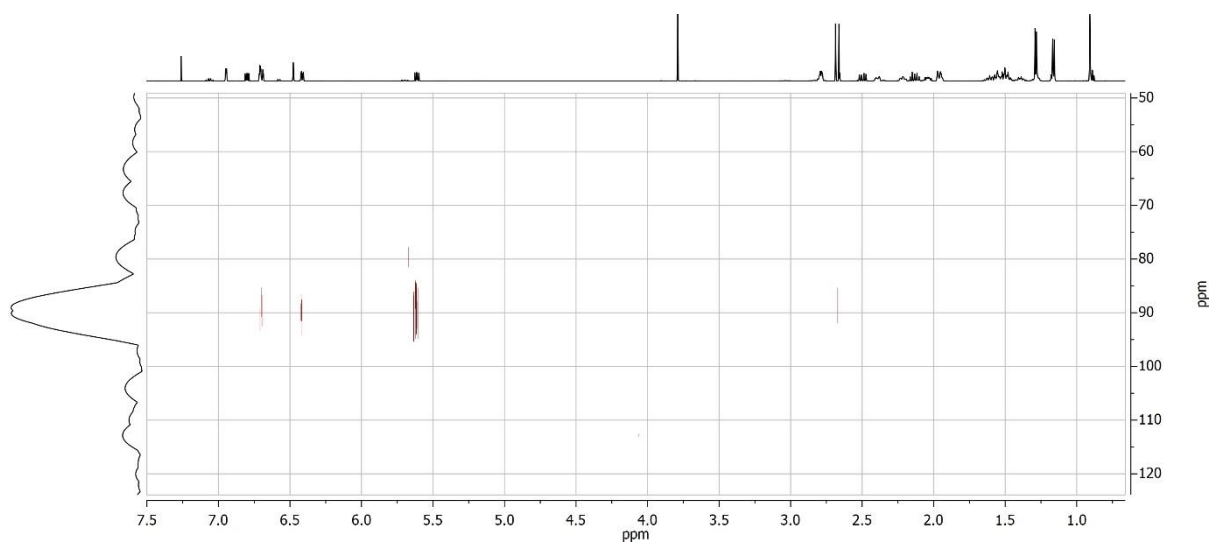

**Figure S30.** HMBC  $^1\text{H}$ - $^{15}\text{N}$  NMR spectrum of SPP (6).



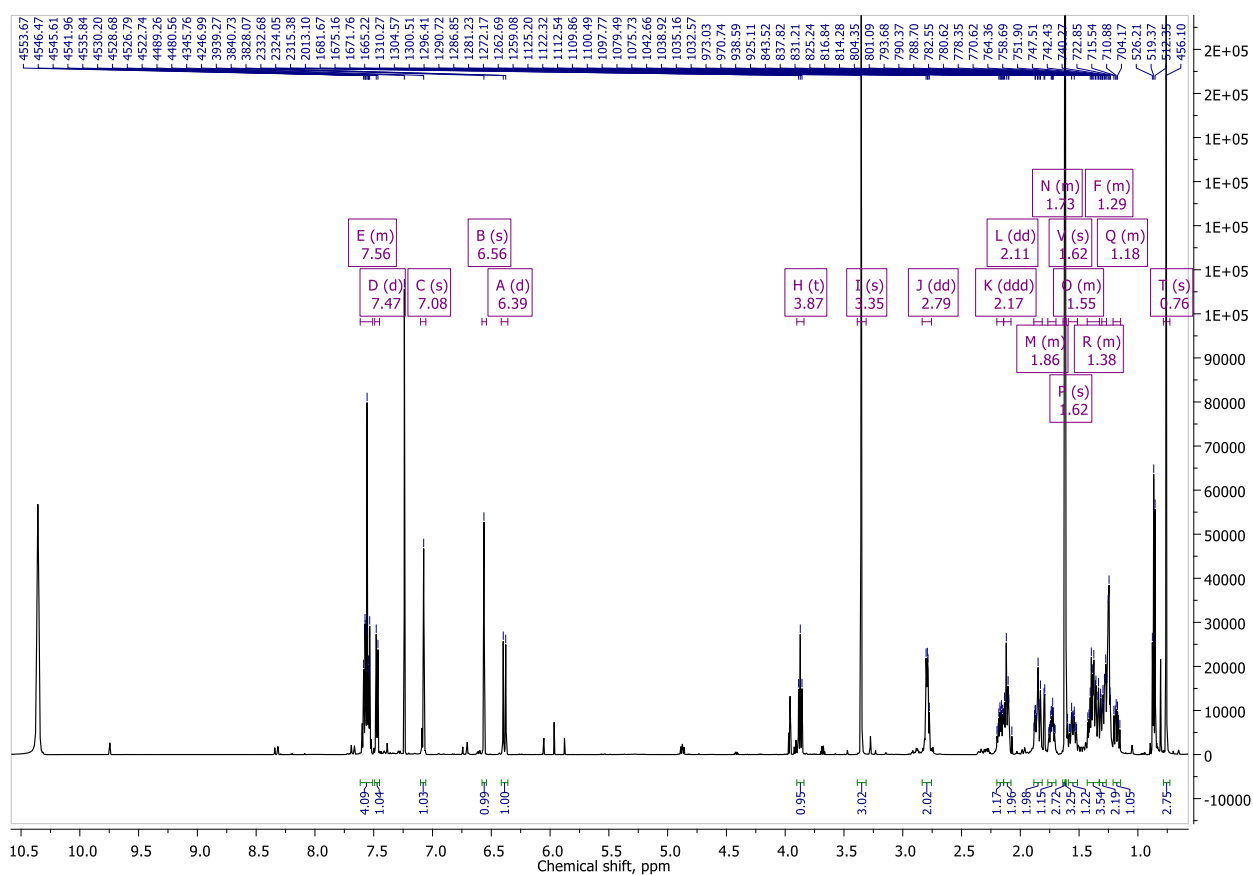

**Figure S31.**  $^1\text{H}$  NMR spectrum of freshly prepared solution of SPP (**3**) in  $\text{CDCl}_3$  with excess of  $\text{TFA-}d$ ; CCCH form predominates.

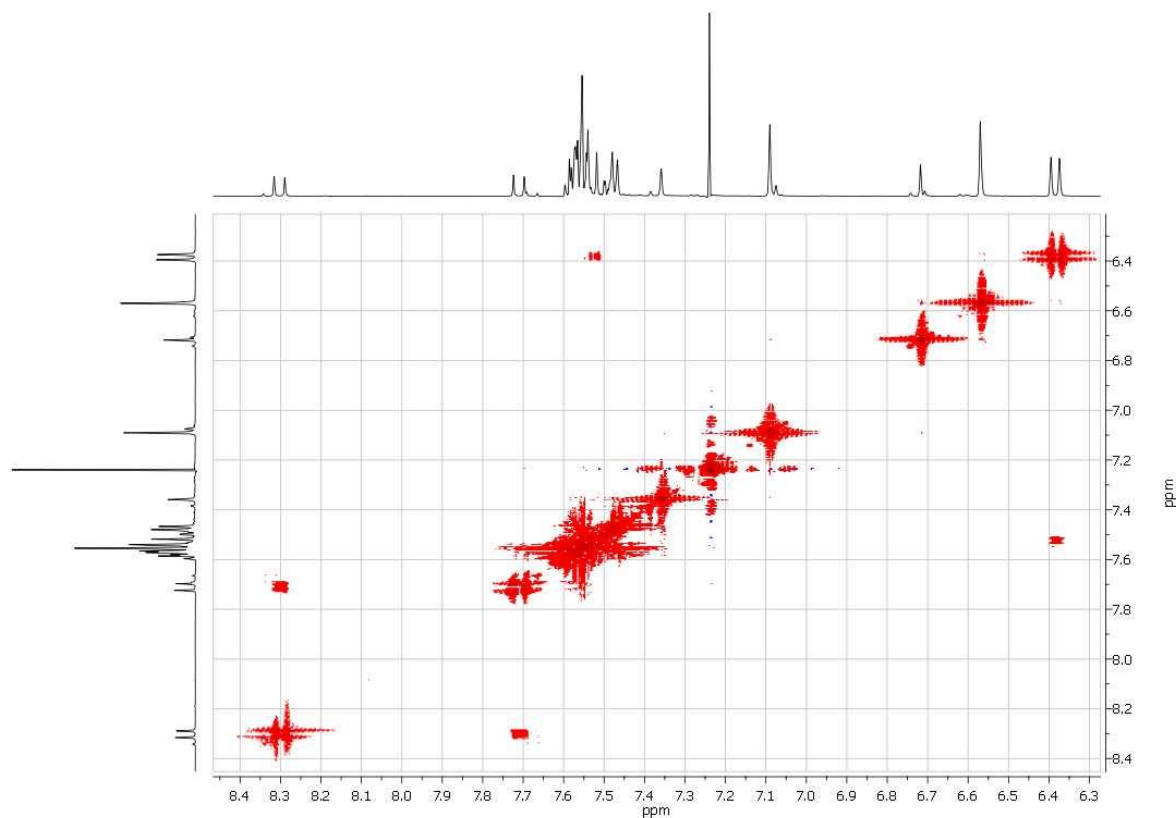

**Figure S32.** Fragment of COSY  $^1\text{H}$ - $^1\text{H}$  NMR spectrum of protonated SPP (**3**); mixture of CCCH and TTCH forms.

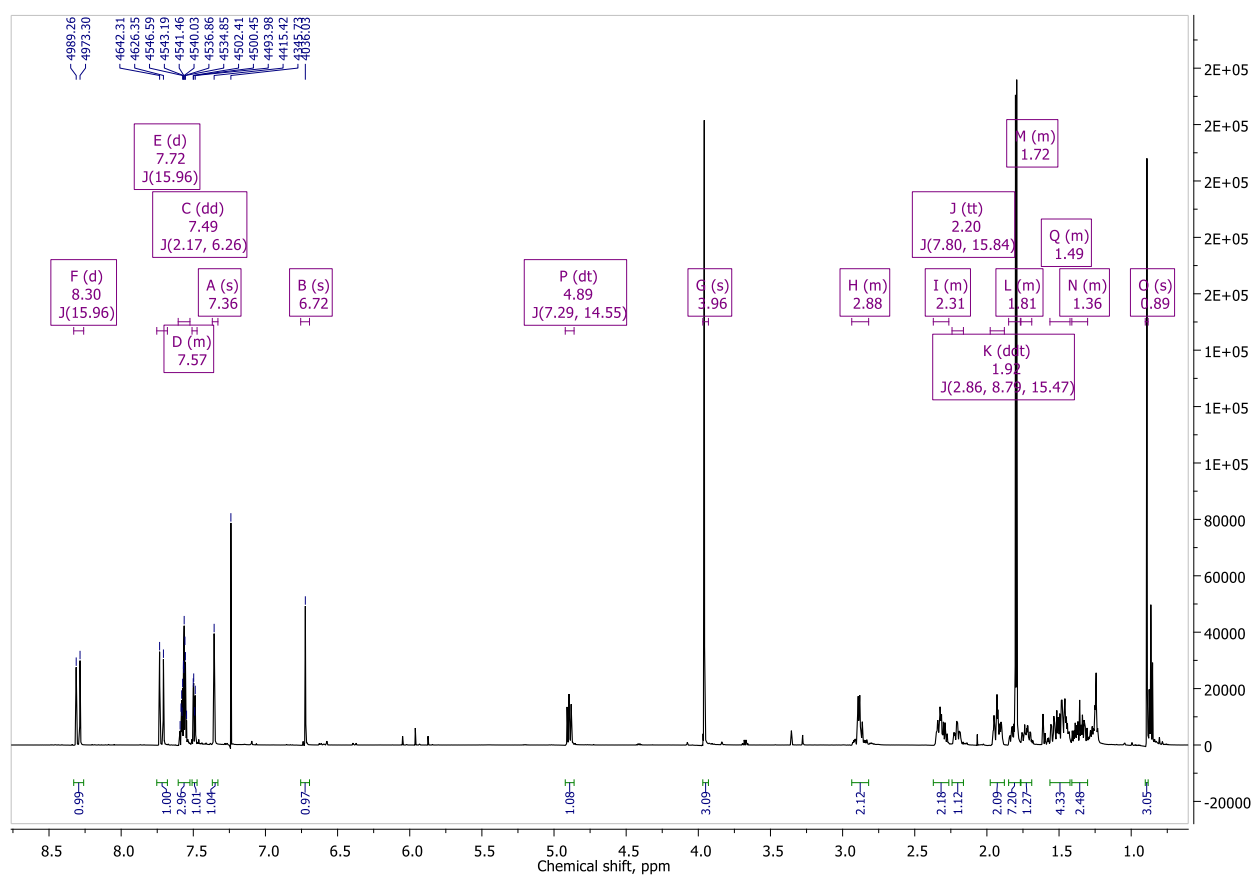

**Figure S33.**  $^1\text{H}$  NMR spectrum of SPP (**3**) solution in  $\text{CDCl}_3$  with excess of  $\text{TFA-d}$  registered after 24 h; TTCH form predominates.

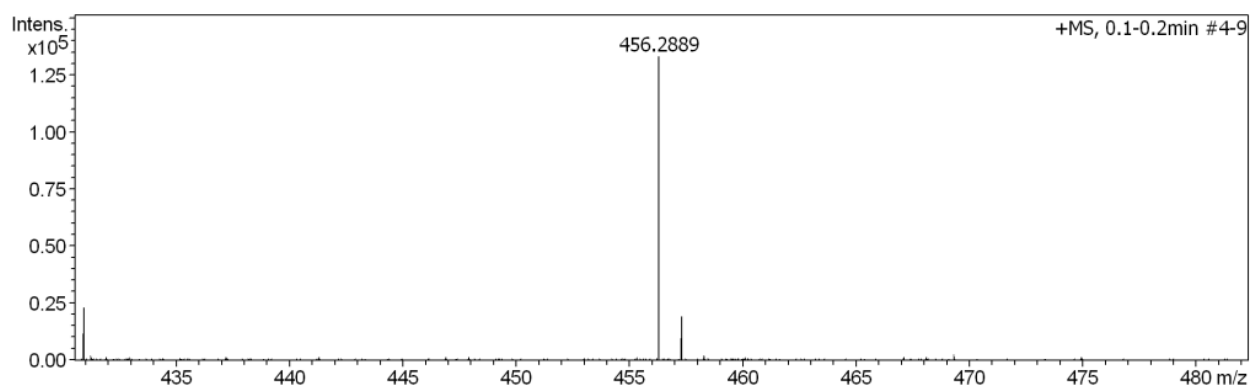

**Figure S34.** HRMS-spectrum of SPP (3).

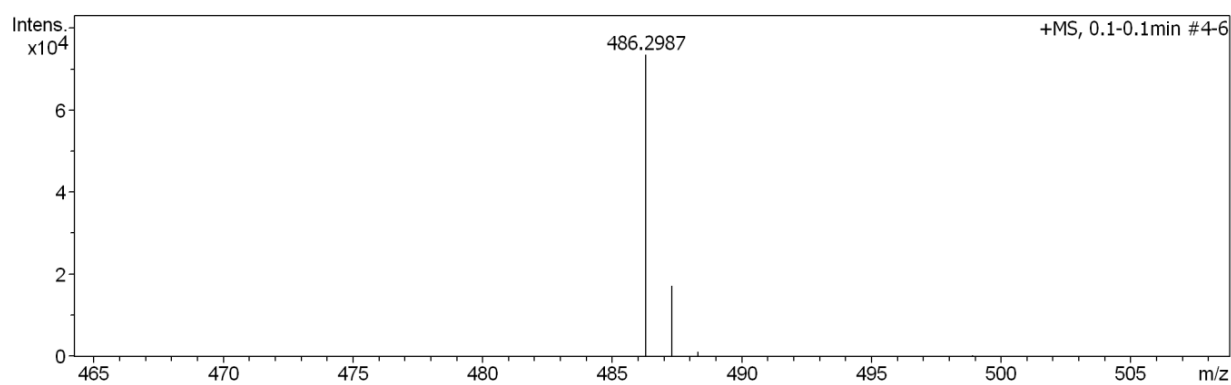

**Figure S35.** HRMS-spectrum of SPP (4).

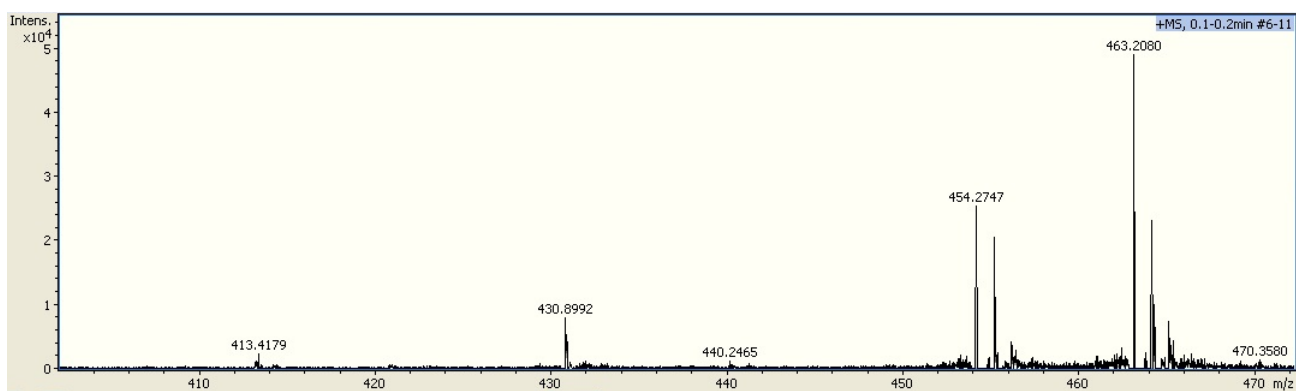

**Figure S36.** HRMS-spectrum of SPP (5).

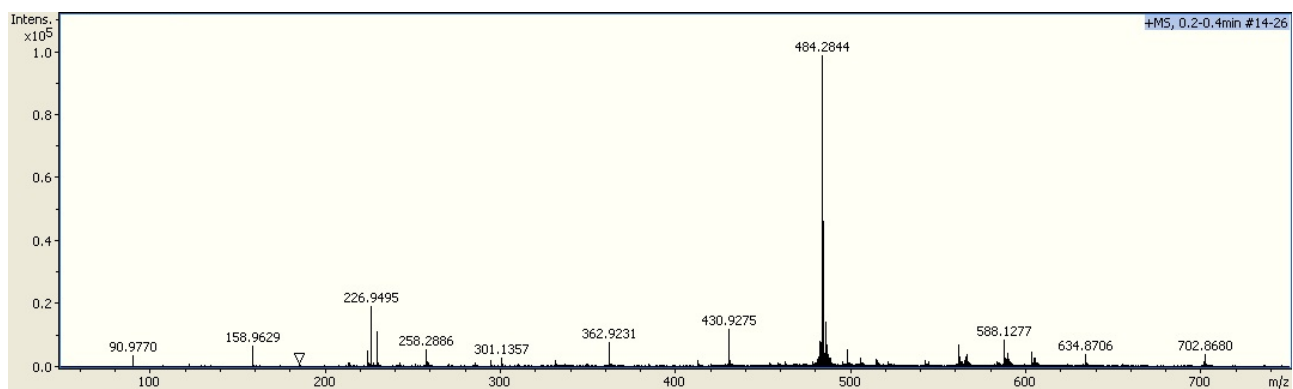

**Figure S37.** HRMS-spectrum of SPP (6).

**Table S1.** Crystal data and structure refinement for SPP (**3**).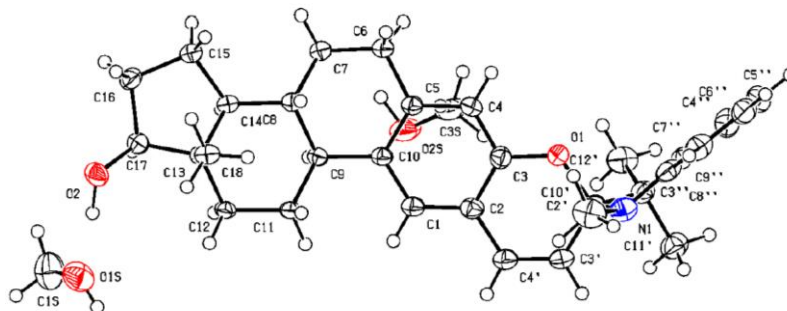

|                                             |                                                               |
|---------------------------------------------|---------------------------------------------------------------|
| CCDC Number                                 | 2163146                                                       |
| Empirical formula                           | C <sub>33</sub> H <sub>45</sub> NO <sub>4</sub>               |
| Formula weight                              | 519.70                                                        |
| Temperature/K                               | 100.00(10)                                                    |
| Crystal system                              | monoclinic                                                    |
| Space group                                 | P2 <sub>1</sub>                                               |
| a/Å                                         | 6.60840(10)                                                   |
| b/Å                                         | 11.1387(2)                                                    |
| c/Å                                         | 19.9797(4)                                                    |
| α/°                                         | 90                                                            |
| β/°                                         | 92.557(2)                                                     |
| γ/°                                         | 90                                                            |
| Volume/Å <sup>3</sup>                       | 1469.22(5)                                                    |
| Z                                           | 2                                                             |
| ρ <sub>calc</sub> /g·cm <sup>-3</sup>       | 1.175                                                         |
| μ/mm <sup>-1</sup>                          | 0.597                                                         |
| F(000)                                      | 564.0                                                         |
| Crystal size/mm <sup>3</sup>                | 0.458 × 0.376 × 0.195                                         |
| Radiation                                   | Cu Kα (λ = 1.54184)                                           |
| 2θ range for data collection/°              | 4.428 to 152.858                                              |
| Index ranges                                | -8 ≤ h ≤ 8, -14 ≤ k ≤ 14, -24 ≤ l ≤ 25                        |
| Reflections collected                       | 39389                                                         |
| Independent reflections                     | 6141 [R <sub>int</sub> = 0.0493, R <sub>sigma</sub> = 0.0254] |
| Data/restraints/parameters                  | 6141/1/358                                                    |
| Goodness-of-fit on F <sup>2</sup>           | 1.111                                                         |
| Final R indexes [I ≥ 2σ (I)]                | R <sub>1</sub> = 0.0623, wR <sub>2</sub> = 0.1731             |
| Final R indexes [all data]                  | R <sub>1</sub> = 0.0628, wR <sub>2</sub> = 0.1736             |
| Largest diff. peak/hole / e Å <sup>-3</sup> | 0.54/-0.27                                                    |
| Flack parameter                             | 0.04(14)                                                      |

**Table S2.** Bond Lengths for SPP (**3**).

| Atom | Atom | Length/Å | Atom | Atom | Length/Å |
|------|------|----------|------|------|----------|
| O2   | C17  | 1.421(5) | C17  | C16  | 1.550(5) |
| O1   | C3   | 1.366(5) | C4   | C5   | 1.399(5) |
| O1   | C2'  | 1.457(5) | C5   | C6   | 1.512(5) |
| O1S  | C1S  | 1.385(8) | C5   | C10  | 1.412(5) |
| O2S  | C3S  | 1.413(6) | C15  | C16  | 1.554(5) |

**Table S2.** Bond Lengths for SPP (3).

| Atom | Atom | Length/Å | Atom | Atom | Length/Å |
|------|------|----------|------|------|----------|
| N1   | C8"  | 1.398(6) | C6   | C7   | 1.528(5) |
| N1   | C2'  | 1.463(6) | C8"  | C9"  | 1.394(7) |
| N1   | C10' | 1.438(7) | C8"  | C7"  | 1.390(6) |
| C3   | C4   | 1.384(6) | C1   | C2   | 1.391(6) |
| C3   | C2   | 1.396(5) | C1   | C10  | 1.394(5) |
| C8   | C14  | 1.531(5) | C2'  | C3"  | 1.544(6) |
| C8   | C9   | 1.541(5) | C2'  | C3'  | 1.505(6) |
| C8   | C7   | 1.528(5) | C2   | C4'  | 1.446(6) |
| C14  | C13  | 1.539(5) | C9"  | C3"  | 1.511(6) |
| C14  | C15  | 1.537(5) | C9"  | C4"  | 1.375(7) |
| C12  | C11  | 1.539(5) | C3"  | C11' | 1.544(6) |
| C12  | C13  | 1.534(5) | C3"  | C12' | 1.536(7) |
| C11  | C9   | 1.536(5) | C4'  | C3'  | 1.334(6) |
| C9   | C10  | 1.520(5) | C5"  | C4"  | 1.405(7) |
| C13  | C17  | 1.541(5) | C5"  | C6"  | 1.387(8) |
| C13  | C18  | 1.528(5) | C7"  | C6"  | 1.400(7) |

**Table S3.** Bond Angles for SPP (3).

| Atom | Atom | Atom | Angle/°  | Atom | Atom | Atom | Angle/°  |
|------|------|------|----------|------|------|------|----------|
| C3   | O1   | C2'  | 122.8(3) | C9"  | C8"  | N1   | 110.2(4) |
| C8"  | N1   | C2'  | 106.7(4) | C7"  | C8"  | N1   | 128.4(5) |
| C8"  | N1   | C10' | 119.6(4) | C7"  | C8"  | C9"  | 121.4(5) |
| C10' | N1   | C2'  | 117.9(4) | C6   | C7   | C8   | 109.9(3) |
| O1   | C3   | C4   | 117.1(3) | C2   | C1   | C10  | 122.9(4) |
| O1   | C3   | C2   | 122.2(4) | O1   | C2'  | N1   | 107.6(3) |
| C4   | C3   | C2   | 120.7(4) | O1   | C2'  | C3"  | 106.2(4) |
| C14  | C8   | C9   | 108.1(3) | O1   | C2'  | C3'  | 112.9(3) |
| C7   | C8   | C14  | 113.8(3) | N1   | C2'  | C3"  | 102.7(3) |
| C7   | C8   | C9   | 108.8(3) | N1   | C2'  | C3'  | 112.8(4) |
| C8   | C14  | C13  | 112.5(3) | C3'  | C2'  | C3"  | 114.0(4) |
| C8   | C14  | C15  | 119.7(3) | C3   | C2   | C4'  | 117.8(4) |
| C15  | C14  | C13  | 104.0(3) | C1   | C2   | C3   | 118.1(4) |
| C13  | C12  | C11  | 111.2(3) | C1   | C2   | C4'  | 124.1(4) |
| C9   | C11  | C12  | 112.6(3) | C5   | C10  | C9   | 121.3(3) |
| C11  | C9   | C8   | 111.6(3) | C1   | C10  | C9   | 120.9(3) |
| C10  | C9   | C8   | 110.9(3) | C1   | C10  | C5   | 117.8(3) |
| C10  | C9   | C11  | 113.1(3) | C8"  | C9"  | C3"  | 108.0(4) |
| C14  | C13  | C17  | 98.8(3)  | C4"  | C9"  | C8"  | 120.6(4) |
| C12  | C13  | C14  | 108.2(3) | C4"  | C9"  | C3"  | 131.2(4) |
| C12  | C13  | C17  | 115.1(3) | C17  | C16  | C15  | 105.3(3) |
| C18  | C13  | C14  | 113.8(3) | C9"  | C3"  | C2'  | 100.9(3) |
| C18  | C13  | C12  | 110.9(3) | C9"  | C3"  | C11' | 108.2(4) |
| C18  | C13  | C17  | 109.7(3) | C9"  | C3"  | C12' | 114.5(4) |
| O2   | C17  | C13  | 116.0(3) | C11' | C3"  | C2'  | 112.4(4) |
| O2   | C17  | C16  | 110.2(3) | C12' | C3"  | C2'  | 112.8(4) |

**Table S3.** Bond Angles for SPP (3).

| Atom | Atom | Atom | Angle/°  | Atom | Atom | Atom | Angle/°  |
|------|------|------|----------|------|------|------|----------|
| C13  | C17  | C16  | 103.9(3) | C12' | C3'' | C11' | 107.9(4) |
| C3   | C4   | C5   | 120.6(3) | C3'  | C4'  | C2   | 121.5(4) |
| C4   | C5   | C6   | 118.2(3) | C6'' | C5'' | C4'' | 119.4(5) |
| C4   | C5   | C10  | 119.8(3) | C9'' | C4'' | C5'' | 119.3(5) |
| C10  | C5   | C6   | 122.0(3) | C4'  | C3'  | C2'  | 122.6(4) |
| C14  | C15  | C16  | 104.0(3) | C8'' | C7'' | C6'' | 117.3(5) |
| C5   | C6   | C7   | 113.4(3) | C5'' | C6'' | C7'' | 122.0(4) |

**Table S4.** Torsion Angles for SPP (3).

| A   | B    | C    | D    | Angle/°   | A    | B    | C    | D    | Angle/°   |
|-----|------|------|------|-----------|------|------|------|------|-----------|
| O2  | C17  | C16  | C15  | 150.5(3)  | C4   | C5   | C10  | C1   | -3.9(6)   |
| O1  | C3   | C4   | C5   | 178.2(4)  | C5   | C6   | C7   | C8   | 43.1(5)   |
| O1  | C3   | C2   | C1   | -179.9(4) | C18  | C13  | C17  | O2   | -46.5(4)  |
| O1  | C3   | C2   | C4'  | 0.1(6)    | C18  | C13  | C17  | C16  | 74.7(4)   |
| O1  | C2'  | C3'' | C9'' | 81.6(4)   | C15  | C14  | C13  | C12  | 167.9(3)  |
| O1  | C2'  | C3'' | C11' | -163.4(4) | C15  | C14  | C13  | C17  | 47.7(3)   |
| O1  | C2'  | C3'' | C12' | -41.1(5)  | C15  | C14  | C13  | C18  | -68.4(4)  |
| O1  | C2'  | C3'  | C4'  | -4.5(7)   | C6   | C5   | C10  | C9   | -4.1(6)   |
| N1  | C8'' | C9'' | C3'' | -0.3(5)   | C6   | C5   | C10  | C1   | 174.5(4)  |
| N1  | C8'' | C9'' | C4'' | -177.0(4) | C8'' | N1   | C2'  | O1   | -79.0(4)  |
| N1  | C8'' | C7'' | C6'' | 177.3(4)  | C8'' | N1   | C2'  | C3'' | 32.8(4)   |
| N1  | C2'  | C3'' | C9'' | -31.2(4)  | C8'' | N1   | C2'  | C3'  | 156.0(4)  |
| N1  | C2'  | C3'' | C11' | 83.8(4)   | C8'' | C9'' | C3'' | C2'  | 19.9(4)   |
| N1  | C2'  | C3'' | C12' | -153.9(4) | C8'' | C9'' | C3'' | C11' | -98.2(4)  |
| N1  | C2'  | C3'  | C4'  | 117.7(5)  | C8'' | C9'' | C3'' | C12' | 141.4(4)  |
| C3  | O1   | C2'  | N1   | -118.7(4) | C8'' | C9'' | C4'' | C5'' | -0.8(7)   |
| C3  | O1   | C2'  | C3'' | 131.9(4)  | C8'' | C7'' | C6'' | C5'' | -0.5(7)   |
| C3  | O1   | C2'  | C3'  | 6.3(6)    | C7   | C8   | C14  | C13  | -178.6(3) |
| C3  | C4   | C5   | C6   | -175.6(4) | C7   | C8   | C14  | C15  | -56.1(4)  |
| C3  | C4   | C5   | C10  | 2.8(6)    | C7   | C8   | C9   | C11  | -179.2(3) |
| C3  | C2   | C4'  | C3'  | 1.7(7)    | C7   | C8   | C9   | C10  | 53.7(4)   |
| C8  | C14  | C13  | C12  | -61.2(4)  | C1   | C2   | C4'  | C3'  | -178.3(5) |
| C8  | C14  | C13  | C17  | 178.7(3)  | C2'  | O1   | C3   | C4   | 177.8(4)  |
| C8  | C14  | C13  | C18  | 62.5(4)   | C2'  | O1   | C3   | C2   | -4.4(7)   |
| C8  | C14  | C15  | C16  | -159.1(3) | C2'  | N1   | C8'' | C9'' | -21.1(4)  |
| C8  | C9   | C10  | C5   | -19.1(5)  | C2'  | N1   | C8'' | C7'' | 160.6(4)  |
| C8  | C9   | C10  | C1   | 162.4(3)  | C2   | C3   | C4   | C5   | 0.3(6)    |
| C14 | C8   | C9   | C11  | -55.2(4)  | C2   | C1   | C10  | C9   | -179.4(4) |
| C14 | C8   | C9   | C10  | 177.7(3)  | C2   | C1   | C10  | C5   | 2.1(6)    |
| C14 | C8   | C7   | C6   | 172.4(3)  | C2   | C4'  | C3'  | C2'  | 0.7(8)    |
| C14 | C13  | C17  | O2   | -165.7(3) | C10  | C5   | C6   | C7   | -8.1(5)   |
| C14 | C13  | C17  | C16  | -44.5(3)  | C10  | C1   | C2   | C3   | 0.9(6)    |
| C14 | C15  | C16  | C17  | 4.1(4)    | C10  | C1   | C2   | C4'  | -179.0(4) |
| C12 | C11  | C9   | C8   | 53.6(4)   | C9'' | C8'' | C7'' | C6'' | -0.7(7)   |
| C12 | C11  | C9   | C10  | 179.4(3)  | C3'' | C2'  | C3'  | C4'  | -125.7(5) |
| C12 | C13  | C17  | O2   | 79.4(4)   | C3'' | C9'' | C4'' | C5'' | -176.7(4) |

**Table S4.** Torsion Angles for SPP (3).

| A   | B   | C   | D   | Angle/°   | A    | B    | C    | D    | Angle/°   |
|-----|-----|-----|-----|-----------|------|------|------|------|-----------|
| C12 | C13 | C17 | C16 | -159.5(3) | C4'' | C9'' | C3'' | C2'  | -163.8(5) |
| C11 | C12 | C13 | C14 | 56.0(4)   | C4'' | C9'' | C3'' | C11' | 78.1(6)   |
| C11 | C12 | C13 | C17 | 165.4(3)  | C4'' | C9'' | C3'' | C12' | -42.3(7)  |
| C11 | C12 | C13 | C18 | -69.4(4)  | C4'' | C5'' | C6'' | C7'' | 1.0(7)    |
| C11 | C9  | C10 | C5  | -145.4(4) | C3'  | C2'  | C3'' | C9'' | -153.5(4) |
| C11 | C9  | C10 | C1  | 36.1(5)   | C3'  | C2'  | C3'' | C11' | -38.5(5)  |
| C9  | C8  | C14 | C13 | 60.5(4)   | C3'  | C2'  | C3'' | C12' | 83.8(5)   |
| C9  | C8  | C14 | C15 | -177.0(3) | C7'' | C8'' | C9'' | C3'' | 178.1(4)  |
| C9  | C8  | C7  | C6  | -67.0(4)  | C7'' | C8'' | C9'' | C4'' | 1.3(7)    |
| C13 | C14 | C15 | C16 | -32.5(4)  | C6'' | C5'' | C4'' | C9'' | -0.3(7)   |
| C13 | C12 | C11 | C9  | -54.0(4)  | C10' | N1   | C8'' | C9'' | -158.3(4) |
| C13 | C17 | C16 | C15 | 25.5(4)   | C10' | N1   | C8'' | C7'' | 23.5(7)   |
| C4  | C3  | C2  | C1  | -2.2(6)   | C10' | N1   | C2'  | O1   | 59.0(5)   |
| C4  | C3  | C2  | C4' | 177.8(4)  | C10' | N1   | C2'  | C3'' | 170.8(4)  |
| C4  | C5  | C6  | C7  | 170.2(4)  | C10' | N1   | C2'  | C3'  | -66.1(5)  |
| C4  | C5  | C10 | C9  | 177.5(3)  |      |      |      |      |           |

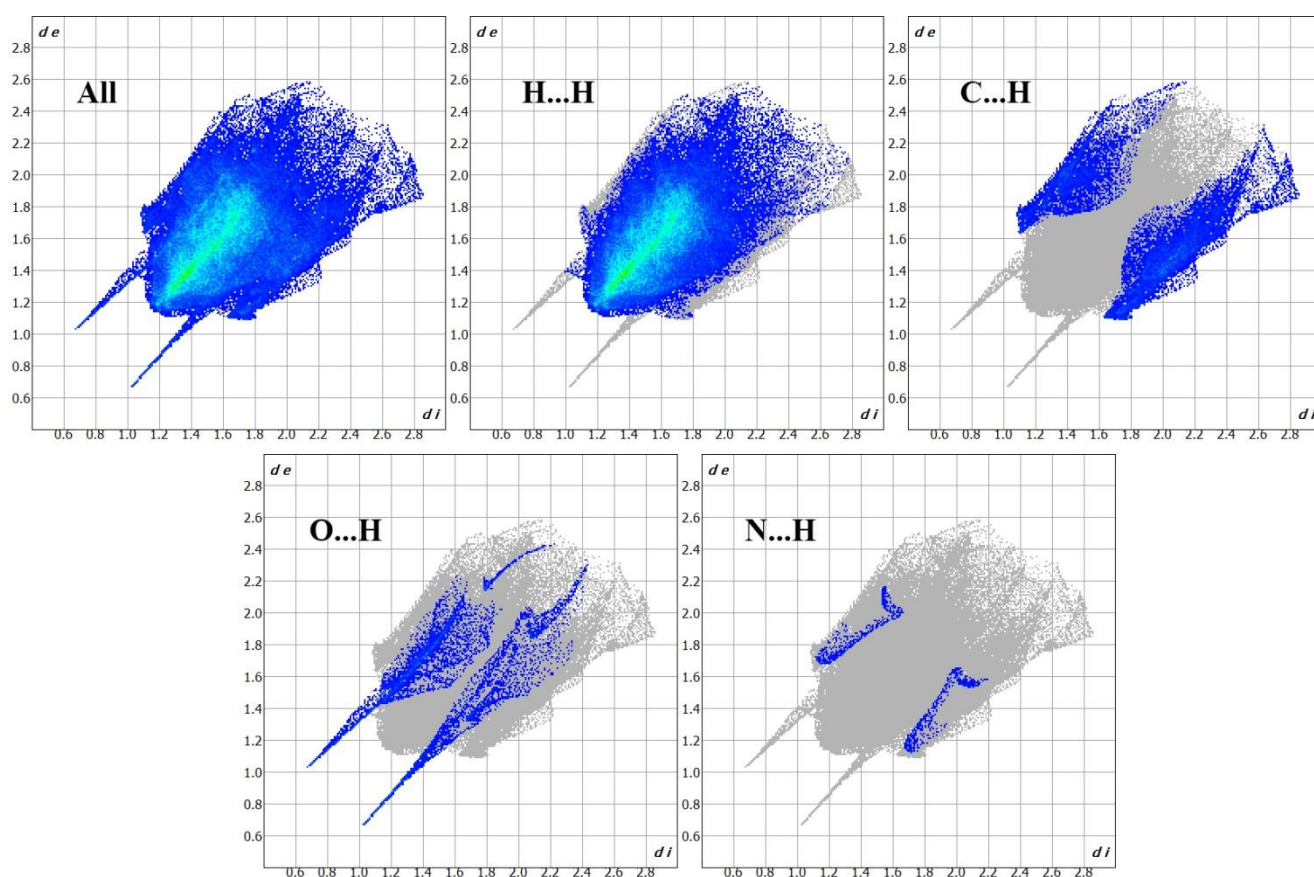**Figure S38.** 2D fingerprint plot for SPP (3).

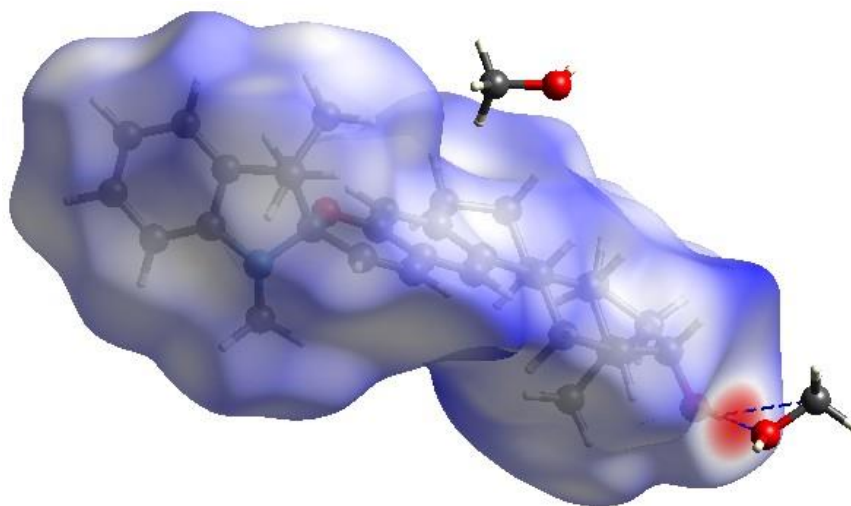

**Figure S39.** Classical hydrogen bond in the crystal of compound (3).

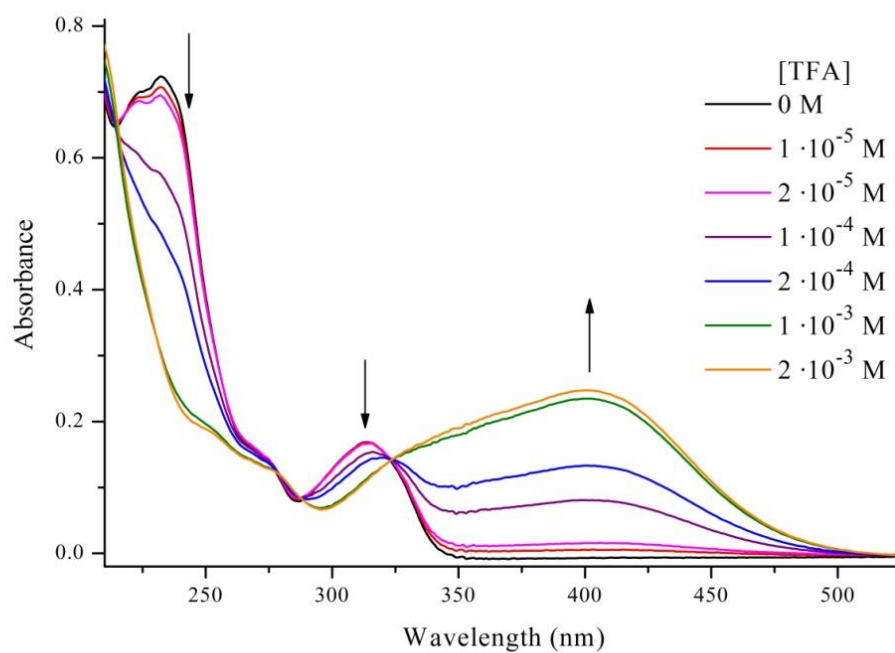

**Figure S40.** Changes in the UV-Vis spectra of SPP (4) in acetonitrile ( $C = 2 \cdot 10^{-5}$  M,  $l = 1$  cm,  $T = 293$  K) under increasing trifluoroacetic acid (TFA) concentration.



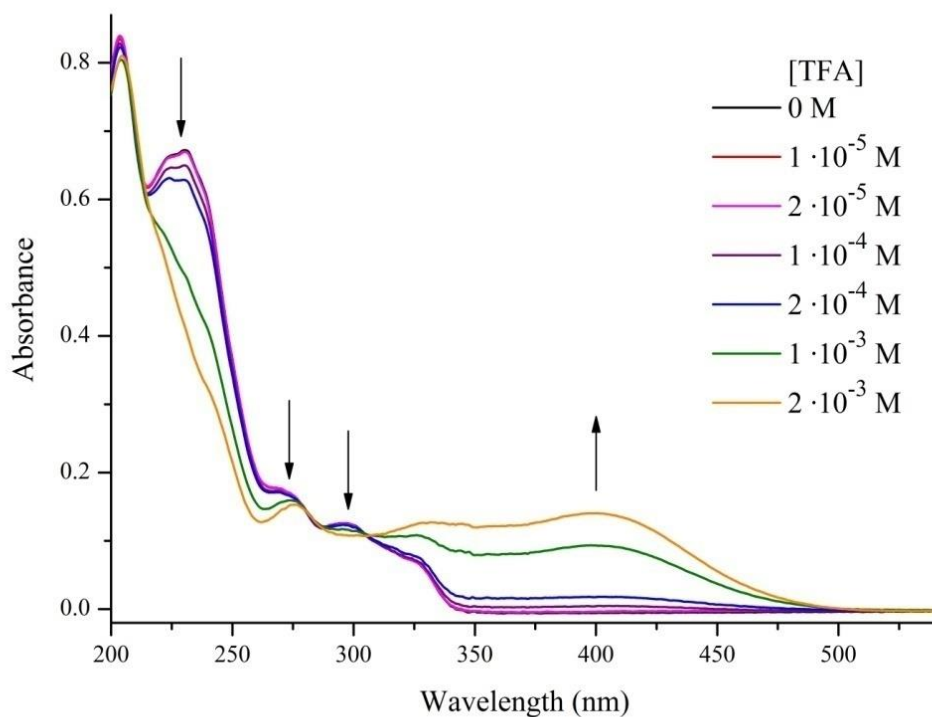

**Figure S41.** Changes in the UV-Vis spectra of SPP (**5**) in acetonitrile ( $C = 2 \cdot 10^{-5}$  M,  $l = 1$  cm,  $T = 293$  K) under increasing TFA concentration.

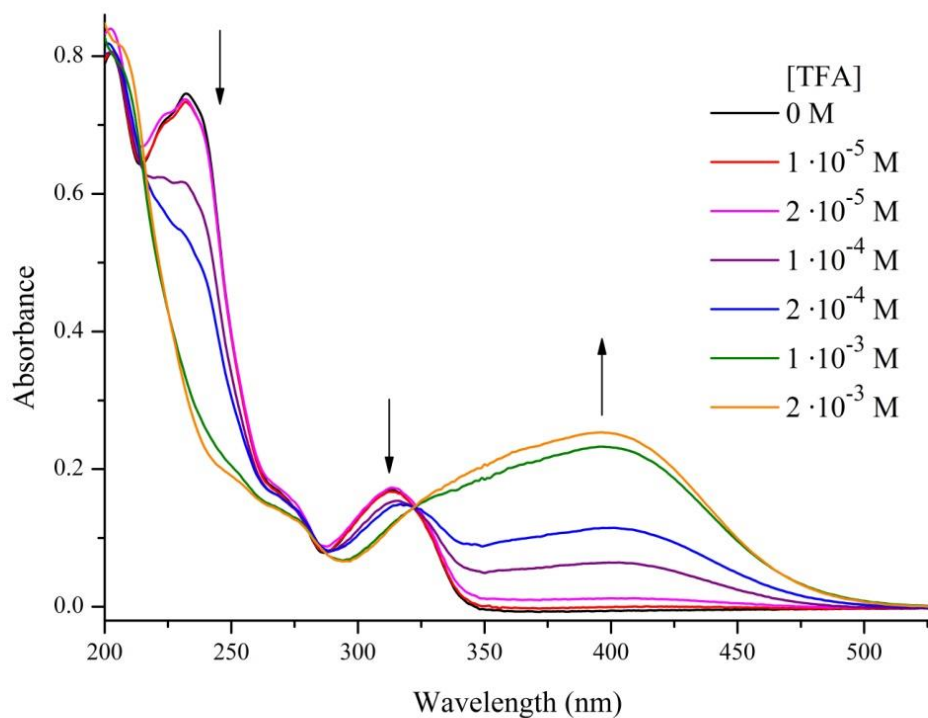

**Figure S42.** Changes in the UV-Vis spectra of SPP (**6**) in acetonitrile ( $C = 2 \cdot 10^{-5}$  M,  $l = 1$  cm,  $T = 293$  K) under increasing TFA concentration.

**Table S5.** Optimized geometry of the cyclic **Sp** form of spiropyran (**3**). The bond lengths and Cartesian coordinates of the atoms are given in Angstroms.

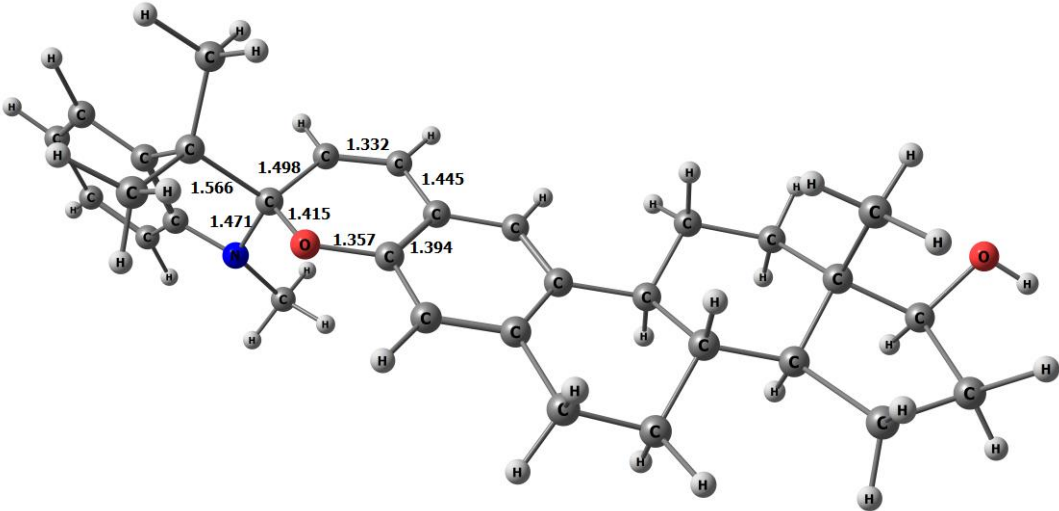

| Atom | X            | Y            | Z            | Atom | X            | Y           | Z            |
|------|--------------|--------------|--------------|------|--------------|-------------|--------------|
| 8    | -5.152400643 | 9.031469249  | 11.508773178 | 1    | -3.723051742 | 6.997028224 | 9.741696540  |
| 8    | 4.544763916  | 5.802900500  | 7.845037887  | 1    | -3.293872255 | 8.340837582 | 8.686466606  |
| 6    | -4.026689810 | 9.670651687  | 10.933437017 | 1    | -2.500595244 | 8.583569135 | 12.901431337 |
| 6    | -3.447071918 | 10.818546241 | 11.781630249 | 1    | -3.465757924 | 7.270041851 | 12.231030137 |
| 6    | -1.923145106 | 10.795488666 | 11.535253800 | 1    | -1.722918459 | 7.305333199 | 11.972805670 |
| 6    | -1.745838813 | 9.730336387  | 10.454057558 | 1    | 4.193536379  | 7.968598073 | 9.144575074  |
| 6    | -0.394282377 | 9.082676224  | 10.245494616 | 1    | 0.026471737  | 5.822095701 | 7.654102719  |
| 6    | 0.726640851  | 10.073588553 | 9.992497432  | 6    | 3.468154730  | 4.025349976 | 6.586105208  |
| 6    | 2.061018197  | 9.352621632  | 9.970692261  | 6    | 4.735534102  | 4.751460947 | 6.917446373  |
| 6    | 2.044772598  | 8.089446106  | 9.152562715  | 6    | 5.861030575  | 3.797693920 | 7.441803946  |
| 6    | 3.265945355  | 7.504625230  | 8.824511910  | 7    | 5.329786648  | 5.290028517 | 5.684832594  |
| 6    | 3.320434490  | 6.334130012  | 8.092925684  | 6    | 6.478122332  | 3.367252570 | 6.134225272  |
| 6    | 2.143498943  | 5.719522605  | 7.667146825  | 6    | 6.146600694  | 4.309414627 | 5.153354606  |
| 6    | 0.929848627  | 6.312666175  | 7.998493809  | 6    | 5.328552205  | 2.664900434 | 8.301718977  |
| 6    | 0.846273588  | 7.488256783  | 8.738320191  | 6    | 6.905954302  | 4.592205173 | 8.231185788  |
| 6    | -0.495351520 | 8.118229011  | 9.056284629  | 6    | 4.544243111  | 6.143233044 | 4.830173306  |
| 6    | -1.624976509 | 7.102347056  | 9.242663809  | 6    | 7.297997090  | 2.304223490 | 5.832959147  |
| 6    | -2.964305579 | 7.765232265  | 9.560486423  | 6    | 6.619723952  | 4.183964275 | 3.854836148  |
| 6    | -2.853356074 | 8.710534899  | 10.747252542 | 6    | 7.788558563  | 2.167884073 | 4.530193983  |
| 6    | -2.615772500 | 7.927002853  | 12.037132389 | 6    | 7.450303332  | 3.101845593 | 3.562249758  |
| 6    | 2.264385272  | 4.495619160  | 6.908138837  | 1    | 3.585964164  | 3.122351684 | 5.998475644  |
| 1    | -5.881989729 | 9.658207299  | 11.509578386 | 1    | 1.360214243  | 3.977250190 | 6.604638082  |
| 1    | -4.300096566 | 10.053236344 | 9.940292742  | 1    | 7.556229988  | 1.574594272 | 6.593741277  |
| 1    | -3.686673312 | 10.636652773 | 12.832028451 | 1    | 8.426338030  | 1.329378400 | 4.276100280  |
| 1    | -3.897377715 | 11.775093418 | 11.508746746 | 1    | 7.827566444  | 2.987128625 | 2.551788290  |
| 1    | -1.384812452 | 10.514413536 | 12.444919116 | 1    | 6.351829050  | 4.898001924 | 3.085262892  |
| 1    | -1.536586302 | 11.766705098 | 11.222510896 | 1    | 4.015302052  | 6.874696265 | 5.441082855  |
| 1    | -2.017044517 | 10.199614093 | 9.495167551  | 1    | 5.206074275  | 6.689682712 | 4.156397573  |
| 1    | -0.131301419 | 8.505843390  | 11.143396090 | 1    | 3.811938990  | 5.590466542 | 4.227663405  |
| 1    | 0.739794797  | 10.847392236 | 10.764307698 | 1    | 7.265380618  | 5.449508452 | 7.659754634  |
| 1    | 0.548810515  | 10.579144600 | 9.035221914  | 1    | 7.753896880  | 3.939475213 | 8.448105934  |
| 1    | 2.339178463  | 9.089526513  | 10.999215494 | 1    | 6.493254382  | 4.951939503 | 9.174931178  |
| 1    | 2.856002061  | 10.008932444 | 9.604965870  | 1    | 6.159064739  | 2.055872601 | 8.665642276  |
| 1    | -0.774917969 | 8.743686377  | 8.193204476  | 1    | 4.647008205  | 2.014475520 | 7.751989194  |
| 1    | -1.346944300 | 6.402751878  | 10.038005856 | 1    | 4.800227474  | 3.064821711 | 9.170993724  |
| 1    | -1.743882922 | 6.504028679  | 8.336730201  |      |              |             |              |

**Table S6.** Optimized geometry of TS(Sp-CCC) of spiropyran (**3**). The bond lengths and Cartesian coordinates of the atoms are given in Angstroms.

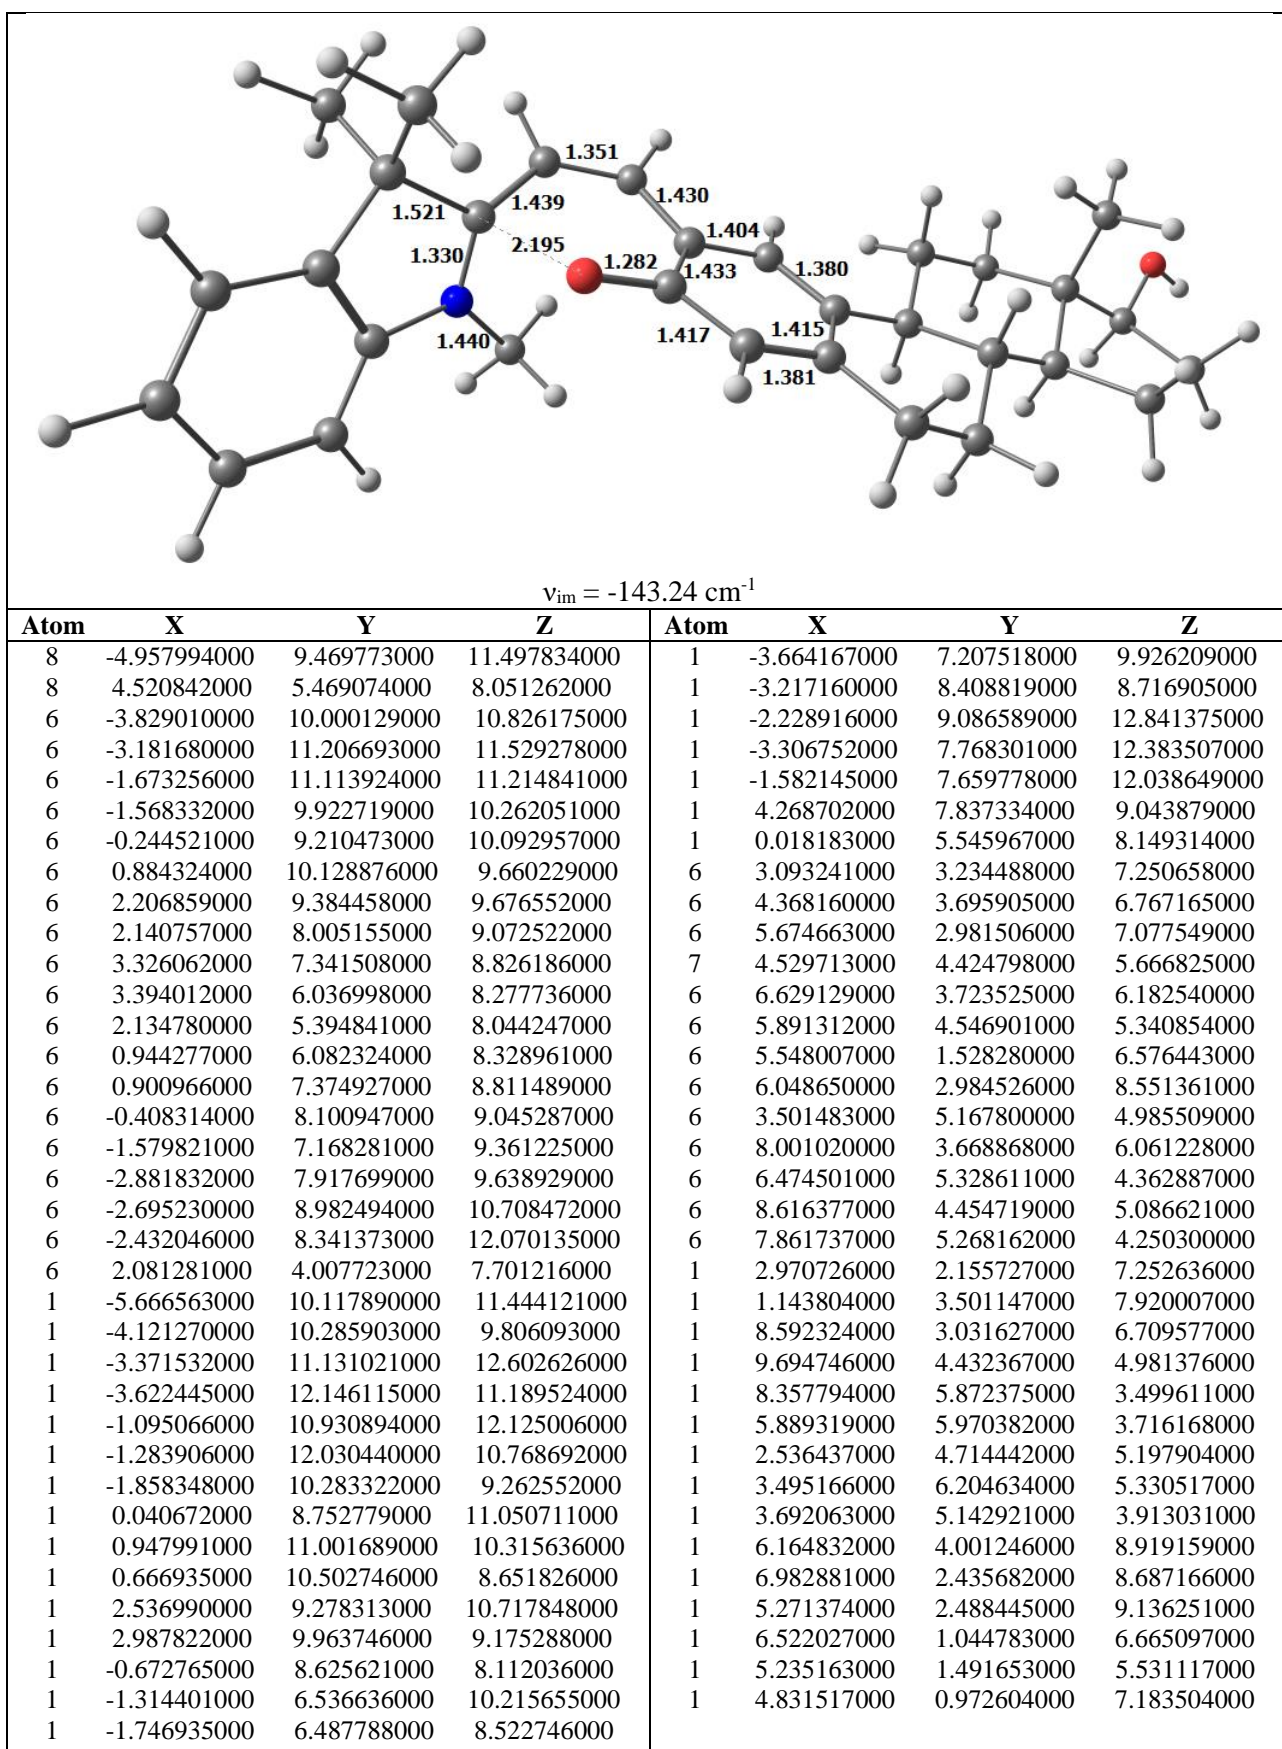

**Table S7.** Optimized geometry of the open CCC form of spiropyran (**3**). The bond lengths and Cartesian coordinates of the atoms are given in Angstroms, the torsion angles - in degrees.

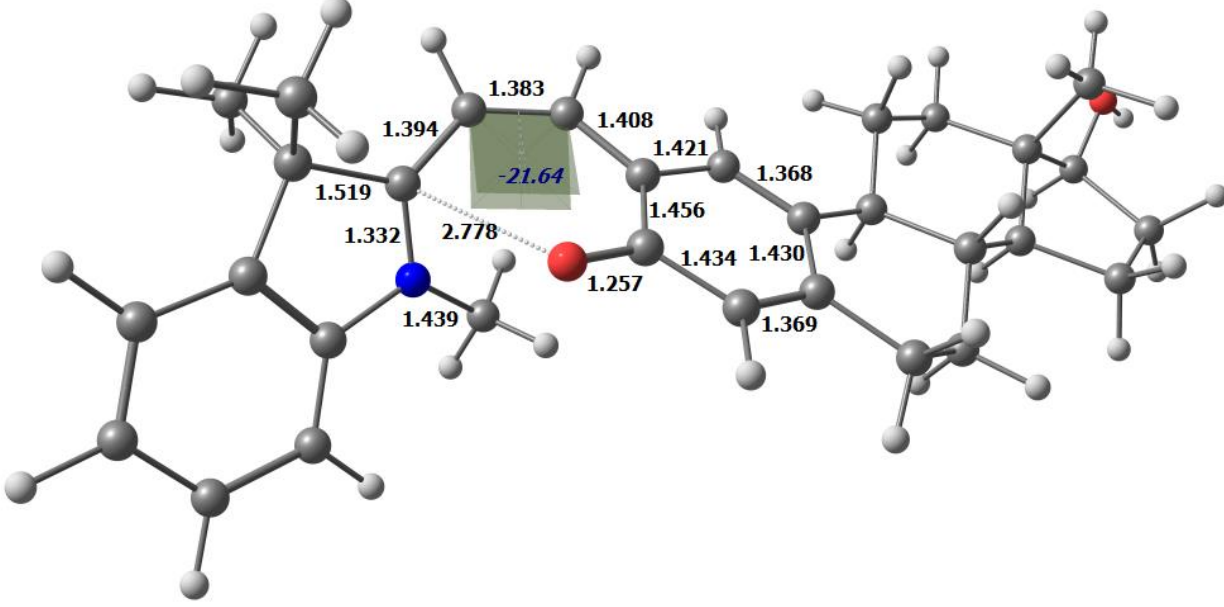

| Atom | X            | Y            | Z            | Atom | X            | Y           | Z            |
|------|--------------|--------------|--------------|------|--------------|-------------|--------------|
| 8    | -5.095705882 | 9.386092329  | 11.381040296 | 1    | -3.551742551 | 7.000981055 | 10.269815343 |
| 8    | 4.748925503  | 5.787577796  | 8.450003201  | 1    | -3.202714352 | 8.009690828 | 8.868712011  |
| 6    | -3.991549809 | 9.890905199  | 10.651285804 | 1    | -2.392657654 | 9.480958283 | 12.822490800 |
| 6    | -3.469467117 | 11.250874992 | 11.149518962 | 1    | -3.327424056 | 8.006296519 | 12.578124125 |
| 6    | -1.948194343 | 11.236641566 | 10.886611625 | 1    | -1.588043316 | 8.009342186 | 12.288058577 |
| 6    | -1.718522274 | 9.919594942  | 10.145343756 | 1    | 4.291159809  | 8.210161279 | 9.175621152  |
| 6    | -0.335286975 | 9.306892661  | 10.100952149 | 1    | 0.243914717  | 5.497608368 | 8.510244496  |
| 6    | 0.728530024  | 10.241682695 | 9.555070257  | 6    | 3.306916000  | 3.303656000 | 7.464132000  |
| 6    | 2.098696512  | 9.610769611  | 9.711984679  | 6    | 4.483591771  | 3.588375050 | 6.773409334  |
| 6    | 2.166577874  | 8.185263163  | 9.232354064  | 6    | 5.684748279  | 2.659112412 | 6.748597458  |
| 6    | 3.393314995  | 7.618250622  | 9.016693550  | 7    | 4.713871050  | 4.636724722 | 5.984914601  |
| 6    | 3.594834361  | 6.265330297  | 8.586496742  | 6    | 6.645599469  | 3.440321746 | 5.895085104  |
| 6    | 2.373399584  | 5.503842397  | 8.364039599  | 6    | 6.020498490  | 4.605519522 | 5.470042730  |
| 6    | 1.124352505  | 6.115147002  | 8.655826088  | 6    | 5.322164123  | 1.321499277 | 6.092809780  |
| 6    | 0.974427139  | 7.416007322  | 9.052449903  | 6    | 6.220530898  | 2.431297682 | 8.162733703  |
| 6    | -0.392852050 | 8.044467747  | 9.230364480  | 6    | 3.734222973  | 5.592478714 | 5.540238700  |
| 6    | -1.464670078 | 7.067937649  | 9.718050422  | 6    | 7.939649670  | 3.171319430 | 5.501689980  |
| 6    | -2.837008312 | 7.723771037  | 9.862880976  | 6    | 6.646598722  | 5.534998997 | 4.660712228  |
| 6    | -2.773499230 | 8.971473952  | 10.730789654 | 6    | 8.595014903  | 4.093486894 | 4.686740497  |
| 6    | -2.498718731 | 8.599736581  | 12.187249787 | 6    | 7.955091911  | 5.257110664 | 4.275578108  |
| 6    | 2.344170000  | 4.147093000  | 7.988796000  | 1    | 3.130027284  | 2.241338950 | 7.609363766  |
| 1    | -5.843402340 | 9.971902762  | 11.229728367 | 1    | 1.405716487  | 3.647234722 | 8.226240340  |
| 1    | -4.271196795 | 9.973522970  | 9.591663969  | 1    | 8.439816884  | 2.263567830 | 5.821317504  |
| 1    | -3.689862221 | 11.342710952 | 12.215830064 | 1    | 9.614671077  | 3.903587649 | 4.372755210  |
| 1    | -3.972768023 | 12.077215202 | 10.643620571 | 1    | 8.481747861  | 5.964483012 | 3.645662293  |
| 1    | -1.389347518 | 11.253833828 | 11.826413111 | 1    | 6.153618507  | 6.445443591 | 4.343790713  |
| 1    | -1.617886336 | 12.097879158 | 10.303745459 | 1    | 2.749547680  | 5.131142215 | 5.582865358  |
| 1    | -2.016928296 | 10.086200716 | 9.098417852  | 1    | 3.731304908  | 6.485062079 | 6.168250602  |
| 1    | -0.036786912 | 9.020319858  | 11.119254174 | 1    | 3.962991039  | 5.870304630 | 4.512381184  |
| 1    | 0.705531958  | 11.201807212 | 10.077401304 | 1    | 6.463457994  | 3.379156060 | 8.644325880  |
| 1    | 0.517423972  | 10.446834507 | 8.498129236  | 1    | 7.121749598  | 1.816565230 | 8.117365880  |
| 1    | 2.364543453  | 9.619686838  | 10.776912434 | 1    | 5.474680073  | 1.912570481 | 8.768157515  |
| 1    | 2.868881737  | 10.199231524 | 9.205866399  | 1    | 6.219608847  | 0.704126855 | 6.019392952  |
| 1    | -0.718359127 | 8.397205560  | 8.237674411  | 1    | 4.918387096  | 1.470784517 | 5.089790573  |
| 1    | -1.144097992 | 6.635620793  | 10.671859575 | 1    | 4.585617293  | 0.785847074 | 6.694468583  |
| 1    | -1.556209236 | 6.232260891  | 9.020640350  |      |              |             |              |

**Table S8.** Optimized geometry of **TS(CCC-CTC)** of spiropyran (**3**). The bond lengths and Cartesian coordinates of the atoms are given in Angstroms, the torsion angles - in degrees.

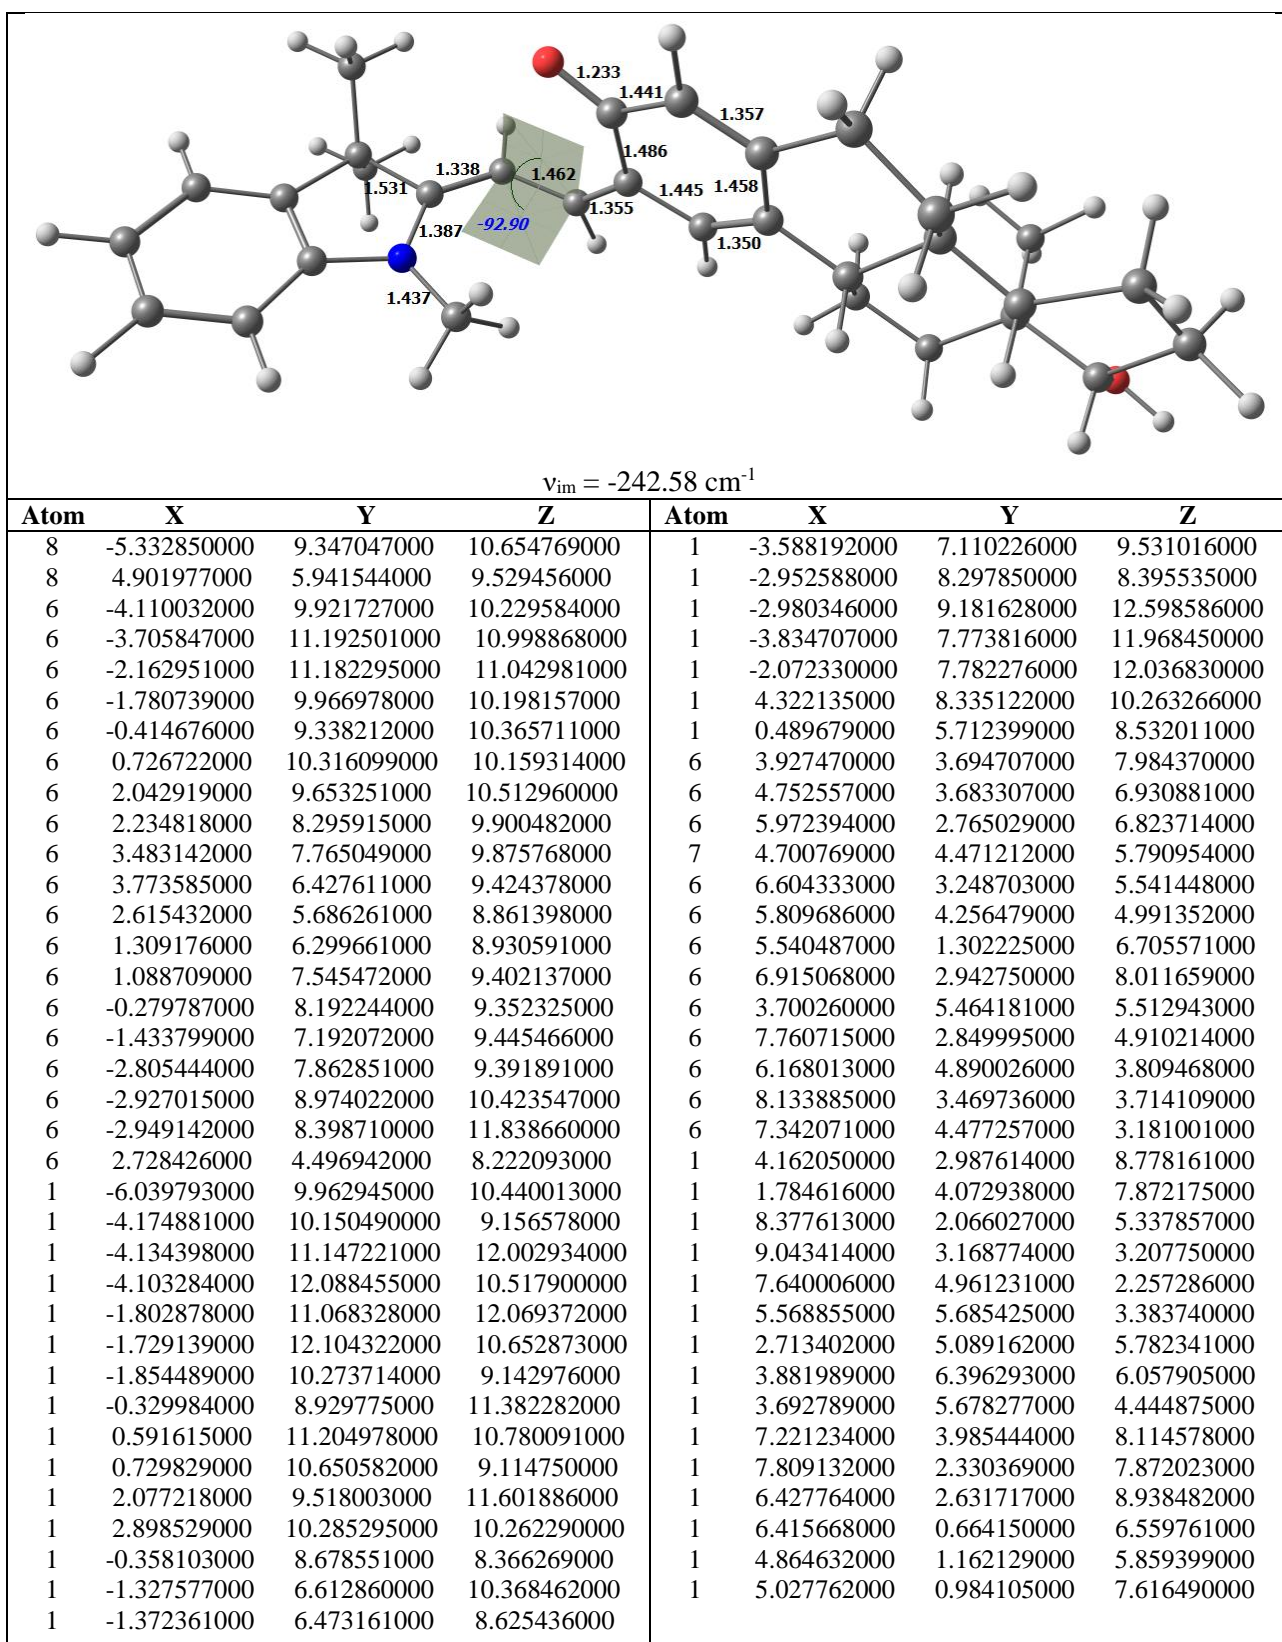



**Table S9.** Optimized geometry of the open CTC form of spiropyran (**3**). The bond lengths and Cartesian coordinates of the atoms are given in Angstroms, the torsion angles - in degrees.

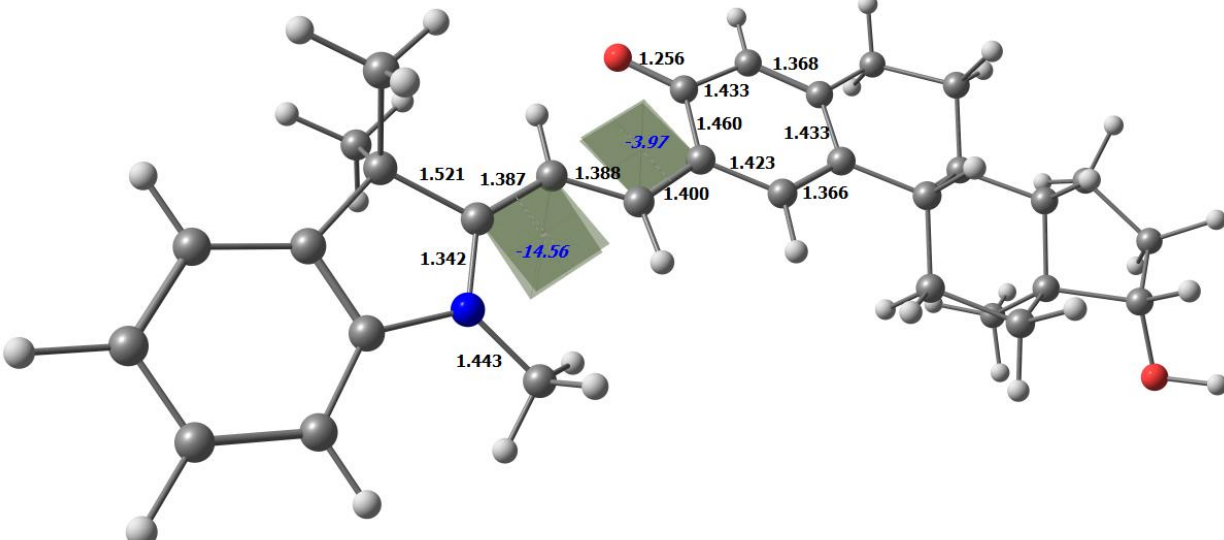

| Atom | X            | Y            | Z            | Atom | X            | Y           | Z            |
|------|--------------|--------------|--------------|------|--------------|-------------|--------------|
| 8    | -5.072607000 | 10.094933000 | 9.187712000  | 1    | -2.858945000 | 8.510094000 | 7.794996000  |
| 8    | 4.789714000  | 5.660353000  | 10.504050000 | 1    | -1.837837000 | 9.931181000 | 8.000240000  |
| 6    | -3.832005000 | 10.489321000 | 9.747593000  | 1    | -3.934337000 | 8.313373000 | 11.379875000 |
| 6    | -3.924173000 | 10.979093000 | 11.204903000 | 1    | -4.290330000 | 7.752746000 | 9.746576000  |
| 6    | -2.601396000 | 10.553042000 | 11.876371000 | 1    | -2.783782000 | 7.283736000 | 10.533612000 |
| 6    | -1.781715000 | 9.967964000  | 10.727369000 | 1    | 3.640741000  | 7.114277000 | 12.283582000 |
| 6    | -0.625850000 | 9.037446000  | 11.023510000 | 1    | 1.352108000  | 7.066205000 | 7.924582000  |
| 6    | 0.400165000  | 9.621733000  | 11.976244000 | 6    | 4.631989000  | 4.896071000 | 7.736575000  |
| 6    | 1.418871000  | 8.561439000  | 12.347620000 | 6    | 5.094598000  | 4.208400000 | 6.624198000  |
| 6    | 1.976147000  | 7.816957000  | 11.164945000 | 6    | 6.534229000  | 3.722944000 | 6.545323000  |
| 6    | 3.132495000  | 7.103040000  | 11.322998000 | 7    | 4.446521000  | 3.844638000 | 5.506543000  |
| 6    | 3.734536000  | 6.308648000  | 10.294042000 | 6    | 6.564691000  | 3.073463000 | 5.191200000  |
| 6    | 3.028053000  | 6.318475000  | 9.016789000  | 6    | 5.305525000  | 3.180683000 | 4.614313000  |
| 6    | 1.833454000  | 7.082070000  | 8.897250000  | 6    | 6.828790000  | 2.715947000 | 7.661130000  |
| 6    | 1.289576000  | 7.823737000  | 9.907233000  | 6    | 7.502052000  | 4.906885000 | 6.622545000  |
| 6    | 0.058562000  | 8.681421000  | 9.697486000  | 6    | 3.038101000  | 4.009876000 | 5.240372000  |
| 6    | -0.931676000 | 8.104197000  | 8.683541000  | 6    | 7.586242000  | 2.443711000 | 4.512996000  |
| 6    | -2.155526000 | 8.996330000  | 8.478755000  | 6    | 5.025729000  | 2.682200000 | 3.354443000  |
| 6    | -2.828394000 | 9.337815000  | 9.799657000  | 6    | 7.327797000  | 1.927752000 | 3.243951000  |
| 6    | -3.492230000 | 8.102093000  | 10.404453000 | 6    | 6.064698000  | 2.048791000 | 2.677628000  |
| 6    | 3.459935000  | 5.626051000  | 7.879465000  | 1    | 5.306789000  | 4.911211000 | 8.582113000  |
| 1    | -5.619837000 | 10.880651000 | 9.095723000  | 1    | 2.806941000  | 5.735010000 | 7.020135000  |
| 1    | -3.393115000 | 11.280443000 | 9.123873000  | 1    | 8.572048000  | 2.352308000 | 4.955919000  |
| 1    | -4.786167000 | 10.506404000 | 11.681879000 | 1    | 8.117980000  | 1.431178000 | 2.693313000  |
| 1    | -4.083813000 | 12.058408000 | 11.248242000 | 1    | 5.880011000  | 1.646882000 | 1.688157000  |
| 1    | -2.779820000 | 9.797594000  | 12.646850000 | 1    | 4.048848000  | 2.777374000 | 2.897760000  |
| 1    | -2.091841000 | 11.387729000 | 12.360536000 | 1    | 2.819976000  | 5.011120000 | 4.862599000  |
| 1    | -1.360362000 | 10.818511000 | 10.168938000 | 1    | 2.730881000  | 3.276639000 | 4.498231000  |
| 1    | -1.016007000 | 8.116705000  | 11.479488000 | 1    | 2.473758000  | 3.837103000 | 6.156573000  |
| 1    | -0.082484000 | 9.998058000  | 12.882009000 | 1    | 7.289676000  | 5.637079000 | 5.839438000  |
| 1    | 0.891982000  | 10.477235000 | 11.496364000 | 1    | 8.525627000  | 4.548229000 | 6.496966000  |
| 1    | 0.930622000  | 7.827387000  | 13.001772000 | 1    | 7.421736000  | 5.400428000 | 7.592827000  |
| 1    | 2.242286000  | 8.982454000  | 12.930727000 | 1    | 7.842929000  | 2.330410000 | 7.539073000  |
| 1    | 0.402423000  | 9.645556000  | 9.287305000  | 1    | 6.130652000  | 1.877658000 | 7.627575000  |
| 1    | -1.236770000 | 7.105570000  | 9.013856000  | 1    | 6.757095000  | 3.195465000 | 8.638865000  |
| 1    | -0.441348000 | 7.967794000  | 7.717074000  |      |              |             |              |

**Table S10.** Optimized geometry of **TS(CTC-TTC)** of spiropyran (**3**). The bond lengths and Cartesian coordinates of the atoms are given in Angstroms, the torsion angles - in degrees.

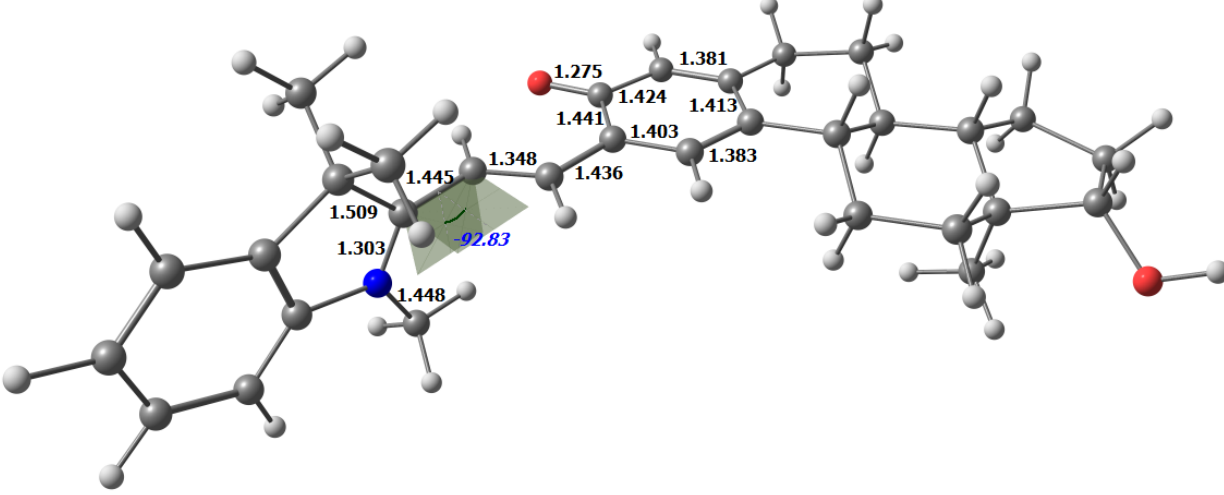

$\nu_{\text{im}} = -169.95 \text{ cm}^{-1}$

| Atom | X            | Y            | Z            | Atom | X            | Y            | Z            |
|------|--------------|--------------|--------------|------|--------------|--------------|--------------|
| 8    | -4.269112000 | 11.181538000 | 8.682946000  | 1    | -2.015616000 | 9.559808000  | 7.442753000  |
| 8    | 4.155744000  | 4.592276000  | 10.799606000 | 1    | -0.900252000 | 10.634413000 | 8.282410000  |
| 6    | -3.203316000 | 11.147017000 | 9.615495000  | 1    | -4.081410000 | 8.718647000  | 10.441158000 |
| 6    | -3.640943000 | 11.255306000 | 11.087988000 | 1    | -3.986941000 | 8.630879000  | 8.683674000  |
| 6    | -2.626457000 | 10.410456000 | 11.889177000 | 1    | -2.863191000 | 7.703631000  | 9.676834000  |
| 6    | -1.599662000 | 9.982501000  | 10.840404000 | 1    | 2.799735000  | 5.803082000  | 12.646118000 |
| 6    | -0.693358000 | 8.798237000  | 11.101744000 | 1    | 1.711401000  | 7.222795000  | 8.075607000  |
| 6    | 0.117368000  | 8.924849000  | 12.379367000 | 6    | 4.453311000  | 4.421363000  | 8.004108000  |
| 6    | 0.874773000  | 7.638243000  | 12.652015000 | 6    | 5.009305000  | 3.924312000  | 6.766083000  |
| 6    | 1.592487000  | 7.089131000  | 11.445082000 | 6    | 6.225924000  | 4.480404000  | 6.067261000  |
| 6    | 2.558050000  | 6.119313000  | 11.633410000 | 7    | 4.560443000  | 2.883369000  | 6.123112000  |
| 6    | 3.271332000  | 5.483441000  | 10.577575000 | 6    | 6.367431000  | 3.533759000  | 4.910391000  |
| 6    | 2.908723000  | 5.924481000  | 9.254066000  | 6    | 5.349610000  | 2.594901000  | 4.980773000  |
| 6    | 1.933378000  | 6.920069000  | 9.094858000  | 6    | 7.428776000  | 4.439679000  | 7.016259000  |
| 6    | 1.261447000  | 7.523774000  | 10.141715000 | 6    | 5.947382000  | 5.917957000  | 5.612909000  |
| 6    | 0.265867000  | 8.643925000  | 9.913805000  | 6    | 3.413471000  | 2.079107000  | 6.491487000  |
| 6    | -0.487039000 | 8.545618000  | 8.586196000  | 6    | 7.281416000  | 3.467998000  | 3.878163000  |
| 6    | -1.465950000 | 9.699220000  | 8.379586000  | 6    | 5.185429000  | 1.574791000  | 4.066700000  |
| 6    | -2.422975000 | 9.835499000  | 9.553871000  | 6    | 7.143609000  | 2.448359000  | 2.939395000  |
| 6    | -3.390838000 | 8.654154000  | 9.598199000  | 6    | 6.113719000  | 1.517412000  | 3.032542000  |
| 6    | 3.504923000  | 5.377256000  | 8.067399000  | 1    | 4.842075000  | 4.010687000  | 8.934749000  |
| 1    | -4.673766000 | 12.053016000 | 8.727331000  | 1    | 3.127322000  | 5.784087000  | 7.129674000  |
| 1    | -2.499186000 | 11.958540000 | 9.384656000  | 1    | 8.087723000  | 4.188036000  | 3.797745000  |
| 1    | -4.655390000 | 10.860725000 | 11.185426000 | 1    | 7.851189000  | 2.377498000  | 2.121702000  |
| 1    | -3.667133000 | 12.296355000 | 11.416336000 | 1    | 6.030725000  | 0.734008000  | 2.288861000  |
| 1    | -3.111156000 | 9.536458000  | 12.333348000 | 1    | 4.382228000  | 0.852791000  | 4.143195000  |
| 1    | -2.171069000 | 10.972622000 | 12.705990000 | 1    | 2.692227000  | 2.096185000  | 5.674187000  |
| 1    | -0.937454000 | 10.846456000 | 10.672660000 | 1    | 3.740965000  | 1.053730000  | 6.664686000  |
| 1    | -1.304140000 | 7.887520000  | 11.181192000 | 1    | 2.972022000  | 2.495009000  | 7.392611000  |
| 1    | -0.531964000 | 9.156643000  | 13.228273000 | 1    | 5.076328000  | 5.965519000  | 4.957035000  |
| 1    | 0.815995000  | 9.764874000  | 12.274575000 | 1    | 6.817589000  | 6.285245000  | 5.066831000  |
| 1    | 0.159384000  | 6.879877000  | 12.995814000 | 1    | 5.777582000  | 6.558827000  | 6.478879000  |
| 1    | 1.587048000  | 7.769430000  | 13.471839000 | 1    | 8.307433000  | 4.809982000  | 6.485934000  |
| 1    | 0.829956000  | 9.591378000  | 9.877341000  | 1    | 7.627983000  | 3.422962000  | 7.359116000  |
| 1    | -1.012983000 | 7.585717000  | 8.542119000  | 1    | 7.243996000  | 5.078117000  | 7.881574000  |
| 1    | 0.221683000  | 8.542461000  | 7.754926000  |      |              |              |              |

**Table S11.** Optimized geometry of the open **TTC** form of spiropyran (**3**). The bond lengths and Cartesian coordinates of the atoms are given in Angstroms.



**Table S12.** Optimized geometry of **TS(CTC-CTT)** of spiropyran (**3**). The bond lengths and Cartesian coordinates of the atoms are given in Angstroms, the torsion angles - in degrees.

| 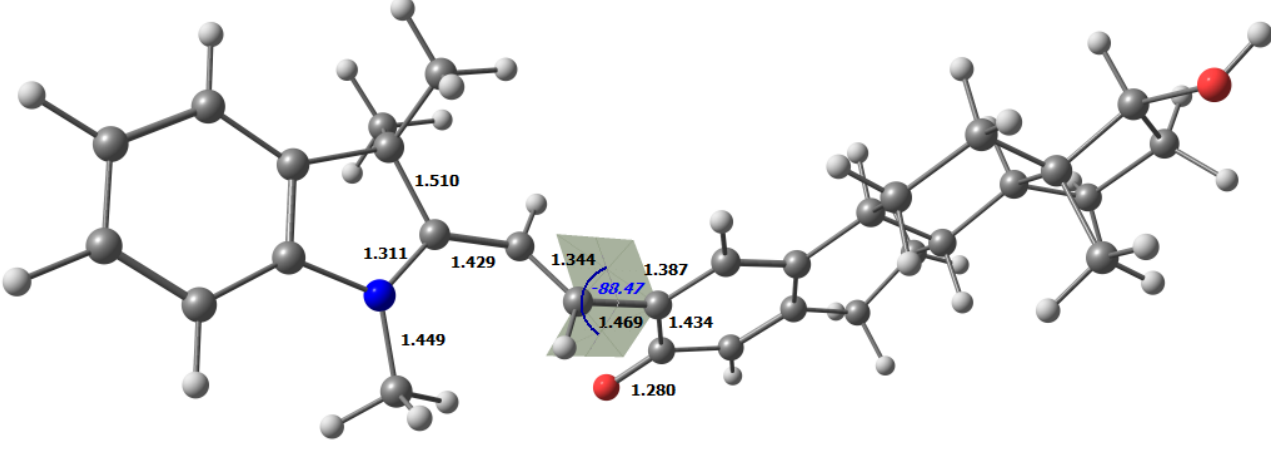 <p style="text-align: center;"><math>\nu_{\text{im}} = -160.06 \text{ cm}^{-1}</math></p> |              |              |              |      |              |              |              |
|------------------------------------------------------------------------------------------------------------------------------------------------------------------------------|--------------|--------------|--------------|------|--------------|--------------|--------------|
| Atom                                                                                                                                                                         | X            | Y            | Z            | Atom | X            | Y            | Z            |
| 8                                                                                                                                                                            | -3.780716000 | 11.547760000 | 8.476330000  | 1    | -1.889380000 | 9.426723000  | 7.363056000  |
| 8                                                                                                                                                                            | 3.352984000  | 3.706724000  | 11.058742000 | 1    | -0.579816000 | 10.348278000 | 8.097248000  |
| 6                                                                                                                                                                            | -2.716057000 | 11.391129000 | 9.398450000  | 1    | -4.012535000 | 9.247815000  | 10.432151000 |
| 6                                                                                                                                                                            | -3.093216000 | 11.701805000 | 10.859237000 | 1    | -3.984431000 | 9.012930000  | 8.686164000  |
| 6                                                                                                                                                                            | -2.245581000 | 10.744078000 | 11.724510000 | 1    | -3.034335000 | 7.961362000  | 9.734850000  |
| 6                                                                                                                                                                            | -1.337955000 | 10.047114000 | 10.711727000 | 1    | 2.170662000  | 5.229005000  | 12.832765000 |
| 6                                                                                                                                                                            | -0.669676000 | 8.735392000  | 11.063127000 | 1    | 1.536240000  | 6.644408000  | 8.174310000  |
| 6                                                                                                                                                                            | 0.144717000  | 8.780357000  | 12.343206000 | 6    | 4.310521000  | 4.756146000  | 7.906951000  |
| 6                                                                                                                                                                            | 0.621907000  | 7.384534000  | 12.699746000 | 6    | 4.943118000  | 4.125880000  | 6.791917000  |
| 6                                                                                                                                                                            | 1.244942000  | 6.653641000  | 11.536360000 | 6    | 5.930569000  | 4.845537000  | 5.904698000  |
| 6                                                                                                                                                                            | 2.023694000  | 5.535696000  | 11.798659000 | 7    | 4.777433000  | 2.891330000  | 6.381747000  |
| 6                                                                                                                                                                            | 2.657053000  | 4.749188000  | 10.799738000 | 6    | 6.237877000  | 3.787252000  | 4.885301000  |
| 6                                                                                                                                                                            | 2.446964000  | 5.229519000  | 9.465302000  | 6    | 5.528293000  | 2.640539000  | 5.207075000  |
| 6                                                                                                                                                                            | 1.655668000  | 6.339238000  | 9.209466000  | 6    | 7.178730000  | 5.234536000  | 6.709364000  |
| 6                                                                                                                                                                            | 1.033202000  | 7.078194000  | 10.215379000 | 6    | 5.280358000  | 6.085631000  | 5.283061000  |
| 6                                                                                                                                                                            | 0.238453000  | 8.327930000  | 9.896503000  | 6    | 4.005795000  | 1.846867000  | 7.025073000  |
| 6                                                                                                                                                                            | -0.545498000 | 8.253015000  | 8.584478000  | 6    | 7.059468000  | 3.794338000  | 3.776949000  |
| 6                                                                                                                                                                            | -1.303930000 | 9.544372000  | 8.280992000  | 6    | 5.586165000  | 1.478747000  | 4.463375000  |
| 6                                                                                                                                                                            | -2.196226000 | 9.955222000  | 9.442925000  | 6    | 7.140340000  | 2.635810000  | 3.008469000  |
| 6                                                                                                                                                                            | -3.370619000 | 8.987849000  | 9.588601000  | 6    | 6.414146000  | 1.498213000  | 3.346312000  |
| 6                                                                                                                                                                            | 3.070682000  | 4.497175000  | 8.355496000  | 1    | 4.863971000  | 5.581635000  | 8.343292000  |
| 1                                                                                                                                                                            | -3.999322000 | 12.483368000 | 8.432639000  | 1    | 2.475541000  | 3.737133000  | 7.852826000  |
| 1                                                                                                                                                                            | -1.880280000 | 12.035188000 | 9.091716000  | 1    | 7.627136000  | 4.677735000  | 3.507720000  |
| 1                                                                                                                                                                            | -4.162665000 | 11.521517000 | 10.992139000 | 1    | 7.776934000  | 2.619881000  | 2.131732000  |
| 1                                                                                                                                                                            | -2.911207000 | 12.751337000 | 11.099374000 | 1    | 6.490852000  | 0.610721000  | 2.729756000  |
| 1                                                                                                                                                                            | -2.880347000 | 10.016683000 | 12.238592000 | 1    | 5.016843000  | 0.595326000  | 4.722256000  |
| 1                                                                                                                                                                            | -1.676122000 | 11.269882000 | 12.492550000 | 1    | 3.017960000  | 1.773240000  | 6.568817000  |
| 1                                                                                                                                                                            | -0.527697000 | 10.753371000 | 10.471562000 | 1    | 4.535290000  | 0.904646000  | 6.898381000  |
| 1                                                                                                                                                                            | -1.441702000 | 7.963165000  | 11.192165000 | 1    | 3.907309000  | 2.075118000  | 8.084191000  |
| 1                                                                                                                                                                            | -0.447558000 | 9.192806000  | 13.164967000 | 1    | 4.378497000  | 5.821762000  | 4.728310000  |
| 1                                                                                                                                                                            | 1.001032000  | 9.451206000  | 12.197545000 | 1    | 5.990546000  | 6.550407000  | 4.597358000  |
| 1                                                                                                                                                                            | -0.235849000 | 6.802291000  | 13.060876000 | 1    | 5.021283000  | 6.807316000  | 6.059338000  |
| 1                                                                                                                                                                            | 1.333337000  | 7.415731000  | 13.530452000 | 1    | 7.905107000  | 5.680671000  | 6.028364000  |
| 1                                                                                                                                                                            | 0.952220000  | 9.161894000  | 9.781087000  | 1    | 7.631479000  | 4.362012000  | 7.182762000  |
| 1                                                                                                                                                                            | -1.238442000 | 7.405800000  | 8.630844000  | 1    | 6.928680000  | 5.968991000  | 7.476052000  |
| 1                                                                                                                                                                            | 0.132375000  | 8.045611000  | 7.753371000  |      |              |              |              |

**Table S13.** Optimized geometry of the open CTT form of spiropyran (**3**). The bond lengths and Cartesian coordinates of the atoms are given in Angstroms.

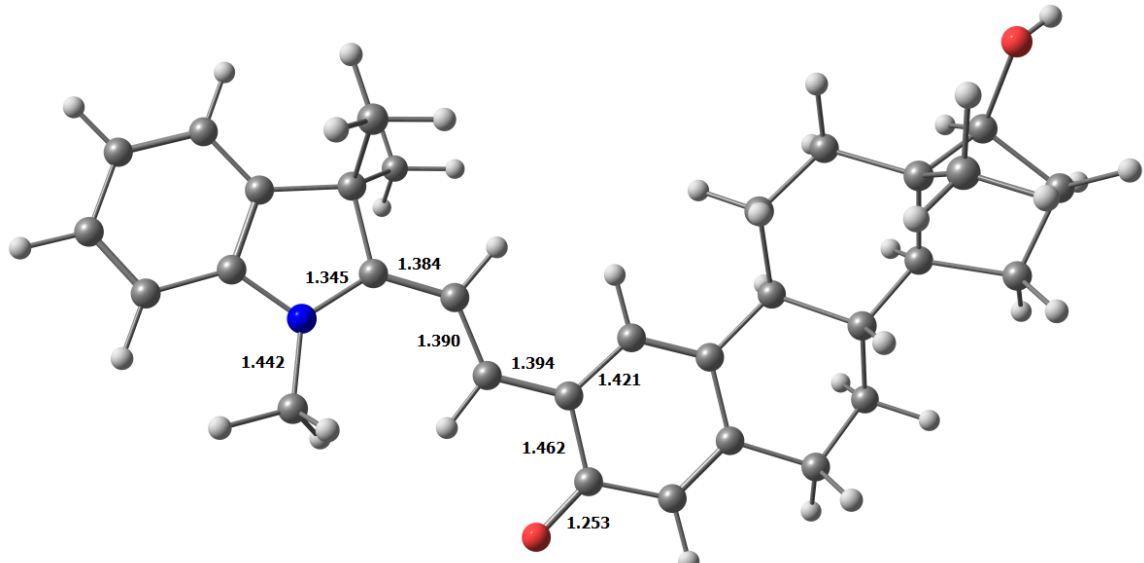

| Atom | X            | Y            | Z            | Atom | X            | Y            | Z            |
|------|--------------|--------------|--------------|------|--------------|--------------|--------------|
| 8    | -2.611617000 | 12.075967000 | 8.239426000  | 1    | -0.445191000 | 10.090105000 | 7.439160000  |
| 8    | 2.739901000  | 3.152437000  | 11.358909000 | 1    | 0.499814000  | 10.696916000 | 8.797113000  |
| 6    | -1.960529000 | 11.643275000 | 9.420924000  | 1    | -3.563544000 | 9.455868000  | 9.415359000  |
| 6    | -2.841388000 | 11.685786000 | 10.683571000 | 1    | -2.892982000 | 9.580693000  | 7.790329000  |
| 6    | -2.374829000 | 10.504187000 | 11.560636000 | 1    | -2.404444000 | 8.257748000  | 8.847768000  |
| 6    | -1.173020000 | 9.939989000  | 10.804124000 | 1    | 1.197475000  | 4.487185000  | 12.951176000 |
| 6    | -0.712042000 | 8.524298000  | 11.074042000 | 1    | 2.101035000  | 6.712517000  | 8.638446000  |
| 6    | -0.387344000 | 8.262426000  | 12.533329000 | 6    | 3.676039000  | 4.789695000  | 7.630806000  |
| 6    | -0.103532000 | 6.787818000  | 12.745771000 | 6    | 4.489849000  | 4.198153000  | 6.680288000  |
| 6    | 0.836766000  | 6.190362000  | 11.734287000 | 6    | 4.932722000  | 4.958728000  | 5.437811000  |
| 6    | 1.401483000  | 4.975686000  | 12.002088000 | 7    | 5.009486000  | 2.958442000  | 6.645735000  |
| 6    | 2.250762000  | 4.272518000  | 11.083616000 | 6    | 5.809616000  | 3.946180000  | 4.756855000  |
| 6    | 2.487847000  | 4.956494000  | 9.813466000  | 6    | 5.826187000  | 2.782760000  | 5.516345000  |
| 6    | 1.894411000  | 6.226677000  | 9.583903000  | 6    | 5.717275000  | 6.215978000  | 5.820331000  |
| 6    | 1.095224000  | 6.861685000  | 10.488776000 | 6    | 3.725569000  | 5.326704000  | 4.569607000  |
| 6    | 0.539738000  | 8.246994000  | 10.229965000 | 6    | 4.746974000  | 1.895822000  | 7.585155000  |
| 6    | 0.321761000  | 8.553102000  | 8.746871000  | 6    | 6.530819000  | 4.019089000  | 3.584451000  |
| 6    | -0.248824000 | 9.949179000  | 8.507026000  | 6    | 6.563897000  | 1.672096000  | 5.146213000  |
| 6    | -1.506692000 | 10.187446000 | 9.327742000  | 6    | 7.277848000  | 2.910667000  | 3.187681000  |
| 6    | -2.657103000 | 9.317675000  | 8.823287000  | 6    | 7.291669000  | 1.757371000  | 3.962293000  |
| 6    | 3.301414000  | 4.313588000  | 8.882251000  | 1    | 3.334681000  | 5.777845000  | 7.344127000  |
| 1    | -2.795185000 | 13.015772000 | 8.329418000  | 1    | 3.677152000  | 3.359791000  | 9.230216000  |
| 1    | -1.063882000 | 12.257684000 | 9.582247000  | 1    | 6.519937000  | 4.921270000  | 2.982554000  |
| 1    | -3.887626000 | 11.576238000 | 10.388167000 | 1    | 7.853919000  | 2.949333000  | 2.270749000  |
| 1    | -2.749369000 | 12.645689000 | 11.195769000 | 1    | 7.881188000  | 0.905055000  | 3.644846000  |
| 1    | -3.162195000 | 9.750448000  | 11.651319000 | 1    | 6.591750000  | 0.769483000  | 5.743117000  |
| 1    | -2.113325000 | 10.815049000 | 12.573354000 | 1    | 3.678368000  | 1.848640000  | 7.796827000  |
| 1    | -0.315750000 | 10.593607000 | 11.029739000 | 1    | 5.055027000  | 0.950977000  | 7.145651000  |
| 1    | -1.504985000 | 7.824604000  | 10.775150000 | 1    | 5.294616000  | 2.048617000  | 8.517806000  |
| 1    | -1.216074000 | 8.569607000  | 13.176438000 | 1    | 3.148302000  | 4.439521000  | 4.303212000  |
| 1    | 0.481865000  | 8.867452000  | 12.819953000 | 1    | 4.075375000  | 5.804327000  | 3.652179000  |
| 1    | -1.052175000 | 6.240694000  | 12.672227000 | 1    | 3.073606000  | 6.026580000  | 5.095569000  |
| 1    | 0.277289000  | 6.594064000  | 13.752137000 | 1    | 6.082371000  | 6.703714000  | 4.914274000  |
| 1    | 1.289506000  | 8.969801000  | 10.592267000 | 1    | 6.572307000  | 5.967965000  | 6.451844000  |
| 1    | -0.339446000 | 7.792390000  | 8.318500000  | 1    | 5.077116000  | 6.919000000  | 6.356628000  |
| 1    | 1.268349000  | 8.472202000  | 8.207631000  |      |              |              |              |

**Table S14.** Optimized geometry of **TS(TTC-TTT)** of spiropyran (**3**). The bond lengths and Cartesian coordinates of the atoms are given in Angstroms, the torsion angles - in degrees.

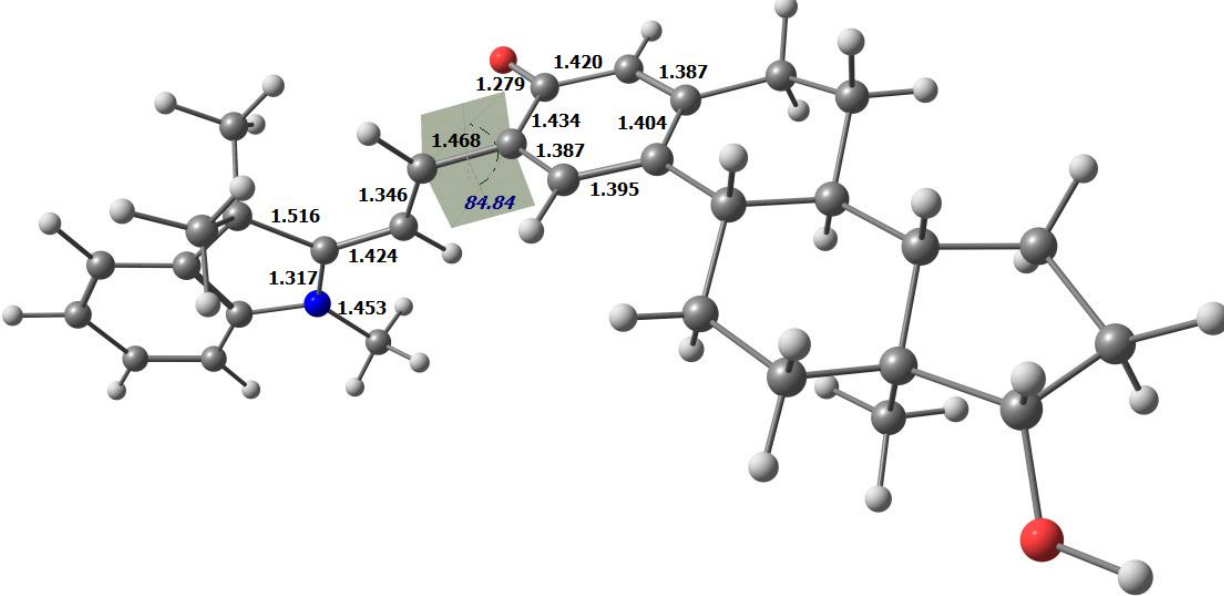

$\nu_{\text{im}} = -210.92 \text{ cm}^{-1}$

| Atom | X            | Y           | Z            | Atom | X            | Y            | Z            |
|------|--------------|-------------|--------------|------|--------------|--------------|--------------|
| 8    | -4.851594000 | 3.335708000 | 15.446205000 | 1    | -2.791639000 | 2.467857000  | 13.356672000 |
| 8    | 1.786620000  | 6.841247000 | 7.564051000  | 1    | -3.951599000 | 2.959932000  | 12.125611000 |
| 6    | -4.980776000 | 4.185519000 | 14.318942000 | 1    | -2.929813000 | 5.650873000  | 15.314937000 |
| 6    | -5.517447000 | 5.591704000 | 14.648358000 | 1    | -2.388812000 | 3.973827000  | 15.326550000 |
| 6    | -4.819216000 | 6.552090000 | 13.662731000 | 1    | -1.653562000 | 5.132035000  | 14.218945000 |
| 6    | -4.045681000 | 5.618358000 | 12.732911000 | 1    | -0.008728000 | 8.360995000  | 8.717706000  |
| 6    | -2.893761000 | 6.153692000 | 11.911019000 | 1    | -0.392249000 | 3.579297000  | 9.766237000  |
| 6    | -3.264494000 | 7.336873000 | 11.035911000 | 6    | 2.846687000  | 3.827273000  | 8.752596000  |
| 6    | -2.018982000 | 7.920460000 | 10.395149000 | 6    | 3.811314000  | 2.899156000  | 8.267644000  |
| 6    | -1.098807000 | 6.879533000 | 9.806209000  | 6    | 3.802432000  | 2.105263000  | 6.976517000  |
| 6    | -0.088439000 | 7.301418000 | 8.954372000  | 7    | 4.914645000  | 2.647623000  | 8.941061000  |
| 6    | 0.868486000  | 6.437936000 | 8.358283000  | 6    | 5.124217000  | 1.392346000  | 7.066485000  |
| 6    | 0.707964000  | 5.059704000 | 8.718451000  | 6    | 5.752374000  | 1.745469000  | 8.250237000  |
| 6    | -0.320170000 | 4.640755000 | 9.550350000  | 6    | 3.773638000  | 3.035265000  | 5.756542000  |
| 6    | -1.237295000 | 5.519622000 | 10.126493000 | 6    | 2.654534000  | 1.086739000  | 6.938408000  |
| 6    | -2.352561000 | 5.024144000 | 11.025275000 | 6    | 5.271280000  | 3.221470000  | 10.227050000 |
| 6    | -1.983898000 | 3.788382000 | 11.848794000 | 6    | 5.735394000  | 0.507720000  | 6.201945000  |
| 6    | -3.123562000 | 3.317495000 | 12.750628000 | 6    | 6.991365000  | 1.258224000  | 8.620799000  |
| 6    | -3.639680000 | 4.444634000 | 13.633656000 | 6    | 6.983273000  | -0.001187000 | 6.551029000  |
| 6    | -2.593720000 | 4.829065000 | 14.679738000 | 6    | 7.599840000  | 0.369969000  | 7.741819000  |
| 6    | 1.657326000  | 4.080826000 | 8.175867000  | 1    | 3.099447000  | 4.372654000  | 9.654661000  |
| 1    | -5.734816000 | 3.146219000 | 15.776576000 | 1    | 1.373042000  | 3.542423000  | 7.275442000  |
| 1    | -5.640509000 | 3.705575000 | 13.582811000 | 1    | 5.259313000  | 0.216495000  | 5.272601000  |
| 1    | -5.269128000 | 5.830470000 | 15.685376000 | 1    | 7.483087000  | -0.695542000 | 5.886151000  |
| 1    | -6.605395000 | 5.627105000 | 14.561751000 | 1    | 8.572294000  | -0.036969000 | 7.991870000  |
| 1    | -4.135162000 | 7.224318000 | 14.188635000 | 1    | 7.478447000  | 1.547126000  | 9.542812000  |
| 1    | -5.527697000 | 7.179404000 | 13.119153000 | 1    | 4.408777000  | 3.206141000  | 10.889477000 |
| 1    | -4.775331000 | 5.207467000 | 12.017067000 | 1    | 6.063250000  | 2.624961000  | 10.669321000 |
| 1    | -2.091703000 | 6.480951000 | 12.587719000 | 1    | 5.619159000  | 4.246302000  | 10.091996000 |
| 1    | -3.774719000 | 8.106631000 | 11.621876000 | 1    | 2.656057000  | 0.463523000  | 7.834189000  |
| 1    | -3.971546000 | 7.000895000 | 10.266616000 | 1    | 2.793113000  | 0.444217000  | 6.067657000  |
| 1    | -1.462874000 | 8.481143000 | 11.157687000 | 1    | 1.685871000  | 1.576782000  | 6.850877000  |
| 1    | -2.283191000 | 8.649586000 | 9.623250000  | 1    | 3.888617000  | 2.431087000  | 4.855325000  |
| 1    | -3.202001000 | 4.726454000 | 10.386870000 | 1    | 4.591160000  | 3.757064000  | 5.798710000  |
| 1    | -1.091949000 | 4.007373000 | 12.445709000 | 1    | 2.830672000  | 3.577403000  | 5.694397000  |
| 1    | -1.708349000 | 2.966776000 | 11.183531000 |      |              |              |              |

**Table S15.** Optimized geometry of **TS(CTT-TTT)** of spiropyran (**3**). The bond lengths and Cartesian coordinates of the atoms are given in Angstroms, the torsion angles - in degrees.

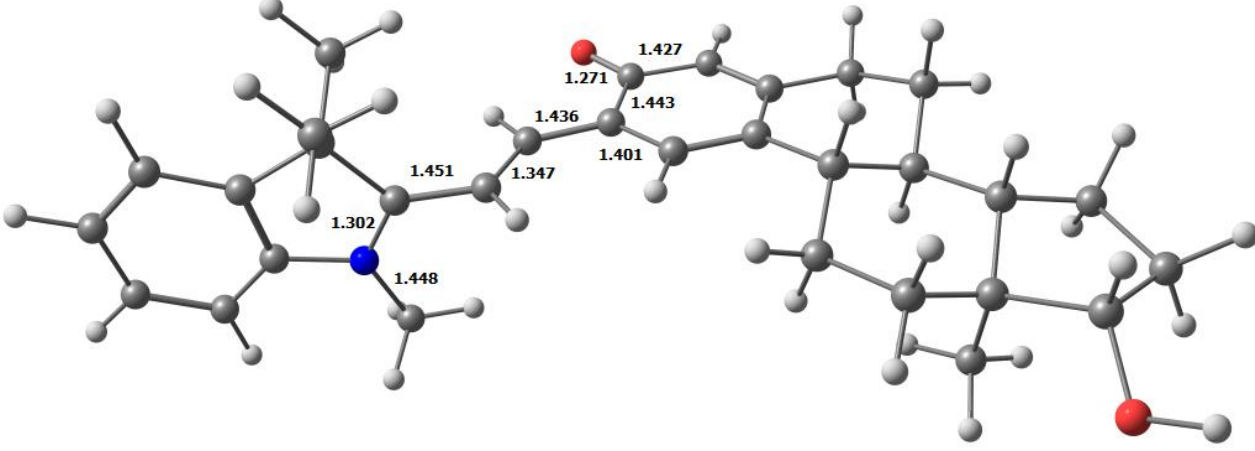

$\nu_{\text{im}} = -211.96 \text{ cm}^{-1}$

| Atom | X            | Y           | Z            | Atom | X            | Y            | Z            |
|------|--------------|-------------|--------------|------|--------------|--------------|--------------|
| 8    | -4.851594000 | 3.335708000 | 15.446205000 | 1    | -2.791639000 | 2.467857000  | 13.356672000 |
| 8    | 1.786620000  | 6.841247000 | 7.564051000  | 1    | -3.951599000 | 2.959932000  | 12.125611000 |
| 6    | -4.980776000 | 4.185519000 | 14.318942000 | 1    | -2.929813000 | 5.650873000  | 15.314937000 |
| 6    | -5.517447000 | 5.591704000 | 14.648358000 | 1    | -2.388812000 | 3.973827000  | 15.326550000 |
| 6    | -4.819216000 | 6.552090000 | 13.662731000 | 1    | -1.653562000 | 5.132035000  | 14.218945000 |
| 6    | -4.045681000 | 5.618358000 | 12.732911000 | 1    | -0.008728000 | 8.360995000  | 8.717706000  |
| 6    | -2.893761000 | 6.153692000 | 11.911019000 | 1    | -0.392249000 | 3.579297000  | 9.766237000  |
| 6    | -3.264494000 | 7.336873000 | 11.035911000 | 6    | 2.846687000  | 3.827273000  | 8.752596000  |
| 6    | -2.018982000 | 7.920460000 | 10.395149000 | 6    | 3.811314000  | 2.899156000  | 8.267644000  |
| 6    | -1.098807000 | 6.879533000 | 9.806209000  | 6    | 3.802432000  | 2.105263000  | 6.976517000  |
| 6    | -0.088439000 | 7.301418000 | 8.954372000  | 7    | 4.914645000  | 2.647623000  | 8.941061000  |
| 6    | 0.868486000  | 6.437936000 | 8.358283000  | 6    | 5.124217000  | 1.392346000  | 7.066485000  |
| 6    | 0.707964000  | 5.059704000 | 8.718451000  | 6    | 5.752374000  | 1.745469000  | 8.250237000  |
| 6    | -0.320170000 | 4.640755000 | 9.550350000  | 6    | 3.773638000  | 3.035265000  | 5.756542000  |
| 6    | -1.237295000 | 5.519622000 | 10.126493000 | 6    | 2.654534000  | 1.086739000  | 6.938408000  |
| 6    | -2.352561000 | 5.024144000 | 11.025275000 | 6    | 5.271280000  | 3.221470000  | 10.227050000 |
| 6    | -1.983898000 | 3.788382000 | 11.848794000 | 6    | 5.735394000  | 0.507720000  | 6.201945000  |
| 6    | -3.123562000 | 3.317495000 | 12.750628000 | 6    | 6.991365000  | 1.258224000  | 8.620799000  |
| 6    | -3.639680000 | 4.444634000 | 13.633656000 | 6    | 6.983273000  | -0.001187000 | 6.551029000  |
| 6    | -2.593720000 | 4.829065000 | 14.679738000 | 6    | 7.599840000  | 0.369969000  | 7.741819000  |
| 6    | 1.657326000  | 4.080826000 | 8.175867000  | 1    | 3.099447000  | 4.372654000  | 9.654661000  |
| 1    | -5.734816000 | 3.146219000 | 15.776576000 | 1    | 1.373042000  | 3.542423000  | 7.275442000  |
| 1    | -5.640509000 | 3.705575000 | 13.582811000 | 1    | 5.259313000  | 0.216495000  | 5.272601000  |
| 1    | -5.269128000 | 5.830470000 | 15.685376000 | 1    | 7.483087000  | -0.695542000 | 5.886151000  |
| 1    | -6.605395000 | 5.627105000 | 14.561751000 | 1    | 8.572294000  | -0.036969000 | 7.991870000  |
| 1    | -4.135162000 | 7.224318000 | 14.188635000 | 1    | 7.478447000  | 1.547126000  | 9.542812000  |
| 1    | -5.527697000 | 7.179404000 | 13.119153000 | 1    | 4.408777000  | 3.206141000  | 10.889477000 |
| 1    | -4.775331000 | 5.207467000 | 12.017067000 | 1    | 6.063250000  | 2.624961000  | 10.669321000 |
| 1    | -2.091703000 | 6.480951000 | 12.587719000 | 1    | 5.619159000  | 4.246302000  | 10.091996000 |
| 1    | -3.774719000 | 8.106631000 | 11.621876000 | 1    | 2.656057000  | 0.463523000  | 7.834189000  |
| 1    | -3.971546000 | 7.000895000 | 10.266616000 | 1    | 2.793113000  | 0.444217000  | 6.067657000  |
| 1    | -1.462874000 | 8.481143000 | 11.157687000 | 1    | 1.685871000  | 1.576782000  | 6.850877000  |
| 1    | -2.283191000 | 8.649586000 | 9.623250000  | 1    | 3.888617000  | 2.431087000  | 4.855325000  |
| 1    | -3.202001000 | 4.726454000 | 10.386870000 | 1    | 4.591160000  | 3.757064000  | 5.798710000  |
| 1    | -1.091949000 | 4.007373000 | 12.445709000 | 1    | 2.830672000  | 3.577403000  | 5.694397000  |
| 1    | -1.708349000 | 2.966776000 | 11.183531000 |      |              |              |              |

**Table S16.** Optimized geometry of the open **TTT** form of spiropyran (**3**). The bond lengths and Cartesian coordinates of the atoms are given in Angstroms.

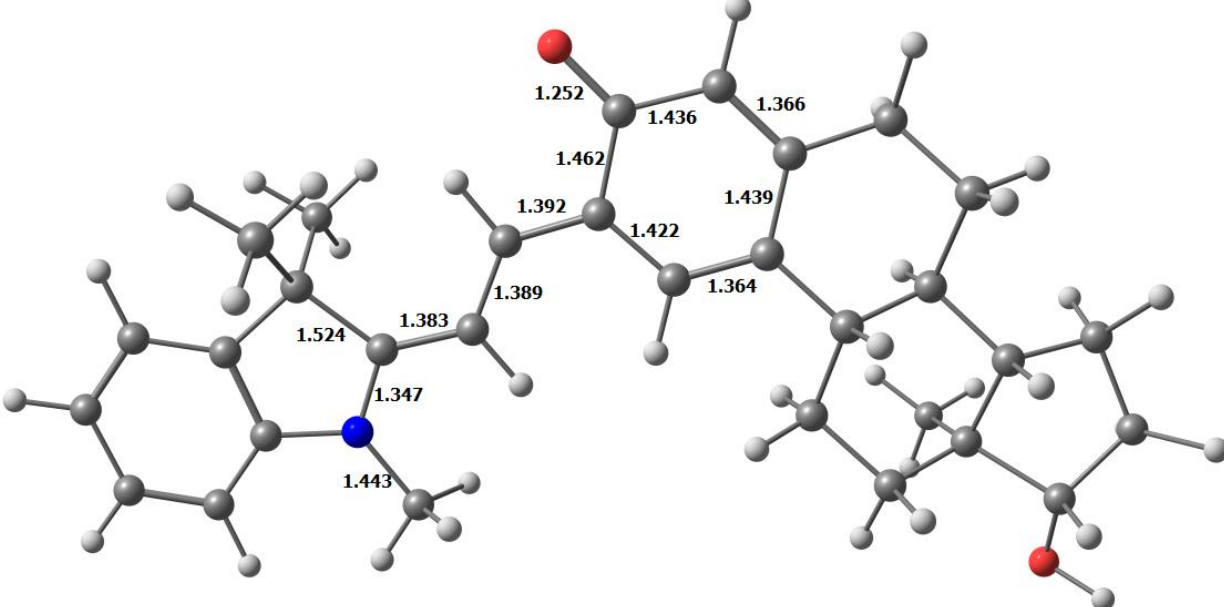

| Atom | X            | Y           | Z            | Atom | X            | Y            | Z            |
|------|--------------|-------------|--------------|------|--------------|--------------|--------------|
| 8    | 1.015630000  | 7.376652000 | 17.929332000 | 1    | 1.840010000  | 5.532826000  | 15.649329000 |
| 8    | 0.406109000  | 5.774426000 | 7.161764000  | 1    | 0.124680000  | 5.232816000  | 15.382307000 |
| 6    | 0.023458000  | 7.464402000 | 16.921725000 | 1    | 1.584743000  | 9.264409000  | 15.628032000 |
| 6    | -0.718617000 | 8.812863000 | 16.876917000 | 1    | 2.625611000  | 7.895418000  | 16.014553000 |
| 6    | -1.059587000 | 9.053983000 | 15.390699000 | 1    | 2.195626000  | 8.234436000  | 14.338050000 |
| 6    | -0.603680000 | 7.769662000 | 14.698839000 | 1    | -0.917250000 | 7.637492000  | 8.379731000  |
| 6    | -0.348473000 | 7.769325000 | 13.206652000 | 1    | 1.558661000  | 4.588549000  | 11.372946000 |
| 6    | -1.554462000 | 8.212482000 | 12.397968000 | 6    | 2.817445000  | 3.220490000  | 9.421911000  |
| 6    | -1.194915000 | 8.322115000 | 10.928740000 | 6    | 3.601970000  | 2.268039000  | 8.796512000  |
| 6    | -0.440742000 | 7.137890000 | 10.388423000 | 6    | 3.701980000  | 1.924600000  | 7.315107000  |
| 6    | -0.378079000 | 6.959557000 | 9.035855000  | 7    | 4.428569000  | 1.461962000  | 9.490096000  |
| 6    | 0.385858000  | 5.920417000 | 8.405366000  | 6    | 4.720599000  | 0.812889000  | 7.338485000  |
| 6    | 1.147008000  | 5.071905000 | 9.321041000  | 6    | 5.115584000  | 0.578899000  | 8.650144000  |
| 6    | 1.022376000  | 5.269396000 | 10.723307000 | 6    | 4.223541000  | 3.100708000  | 6.482860000  |
| 6    | 0.248102000  | 6.243692000 | 11.281125000 | 6    | 2.366935000  | 1.402797000  | 6.771117000  |
| 6    | 0.042406000  | 6.348267000 | 12.777892000 | 6    | 4.583007000  | 1.504736000  | 10.924560000 |
| 6    | 1.200725000  | 5.786816000 | 13.602903000 | 6    | 5.256257000  | 0.067794000  | 6.310120000  |
| 6    | 0.958671000  | 5.890472000 | 15.107145000 | 6    | 6.045461000  | -0.392798000 | 8.976803000  |
| 6    | 0.608780000  | 7.311921000 | 15.518600000 | 6    | 6.194391000  | -0.917756000 | 6.614345000  |
| 6    | 1.818758000  | 8.232381000 | 15.360915000 | 6    | 6.579684000  | -1.139740000 | 7.930733000  |
| 6    | 1.963637000  | 4.094117000 | 8.760244000  | 1    | 2.892824000  | 3.283713000  | 10.500659000 |
| 1    | 0.574122000  | 7.411073000 | 18.783253000 | 1    | 1.907438000  | 4.051879000  | 7.678832000  |
| 1    | -0.704283000 | 6.653378000 | 17.064915000 | 1    | 4.954668000  | 0.242529000  | 5.282979000  |
| 1    | -0.060174000 | 9.592274000 | 17.268156000 | 1    | 6.626169000  | -1.514303000 | 5.819541000  |
| 1    | -1.607849000 | 8.795058000 | 17.510241000 | 1    | 7.310735000  | -1.908346000 | 8.153307000  |
| 1    | -0.513484000 | 9.917156000 | 14.999808000 | 1    | 6.356787000  | -0.576216000 | 9.997212000  |
| 1    | -2.121332000 | 9.250133000 | 15.233557000 | 1    | 3.627269000  | 1.307071000  | 11.413864000 |
| 1    | -1.385410000 | 7.014602000 | 14.878038000 | 1    | 5.297970000  | 0.747707000  | 11.232503000 |
| 1    | 0.482382000  | 8.452460000 | 12.981247000 | 1    | 4.948496000  | 2.484767000  | 11.237564000 |
| 1    | -1.926320000 | 9.176792000 | 12.754207000 | 1    | 2.003043000  | 0.569531000  | 7.375004000  |
| 1    | -2.364142000 | 7.486194000 | 12.542114000 | 1    | 2.510506000  | 1.051203000  | 5.747543000  |
| 1    | -0.551959000 | 9.202087000 | 10.795926000 | 1    | 1.607140000  | 2.184212000  | 6.763681000  |
| 1    | -2.079730000 | 8.502337000 | 10.312485000 | 1    | 4.407877000  | 2.759618000  | 5.462261000  |
| 1    | -0.839802000 | 5.731298000 | 13.018379000 | 1    | 5.159980000  | 3.482224000  | 6.893928000  |
| 1    | 2.123528000  | 6.308710000 | 13.328136000 | 1    | 3.503112000  | 3.917401000  | 6.444600000  |
| 1    | 1.359476000  | 4.735021000 | 13.353900000 |      |              |              |              |



**Table S17.** Optimized geometry of the N-protonated cationic form **SPH** of spiropyran (**3**). The bond lengths and Cartesian coordinates of the atoms are given in Angstroms.

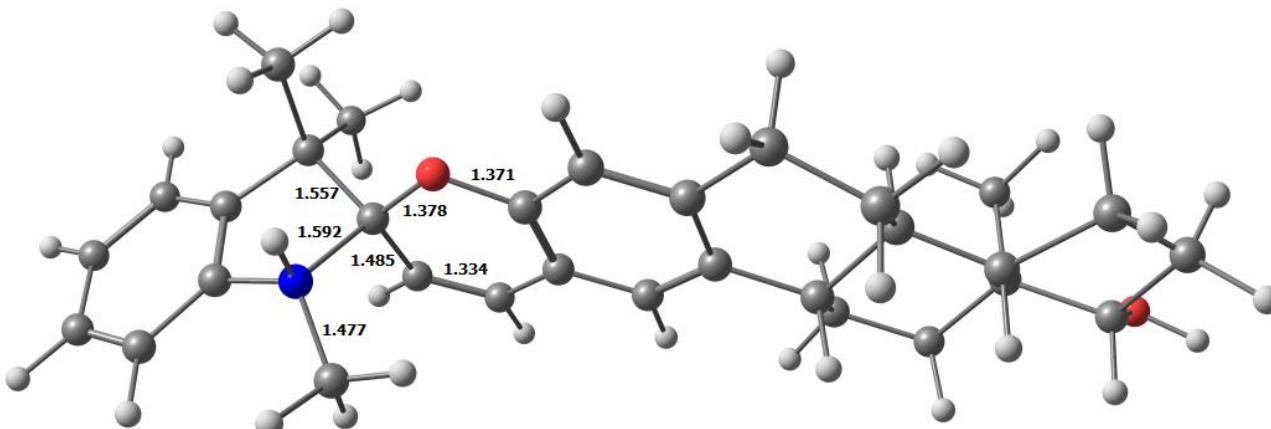

| Atom | X            | Y            | Z            | Atom | X            | Y           | Z            |
|------|--------------|--------------|--------------|------|--------------|-------------|--------------|
| 8    | -5.150724000 | 9.004820000  | 11.502036000 | 1    | -3.711646000 | 6.937122000 | 9.782857000  |
| 8    | 4.550650000  | 5.735720000  | 7.915848000  | 1    | -3.301792000 | 8.255855000 | 8.688663000  |
| 6    | -4.035733000 | 9.639361000  | 10.901889000 | 1    | -2.467241000 | 8.627635000 | 12.885957000 |
| 6    | -3.463141000 | 10.816250000 | 11.713488000 | 1    | -3.445468000 | 7.295609000 | 12.272431000 |
| 6    | -1.942007000 | 10.808276000 | 11.449770000 | 1    | -1.706911000 | 7.318084000 | 11.987187000 |
| 6    | -1.759030000 | 9.709466000  | 10.403542000 | 1    | 4.194047000  | 7.948280000 | 9.153952000  |
| 6    | -0.401774000 | 9.068718000  | 10.211754000 | 1    | 0.034334000  | 5.740404000 | 7.710245000  |
| 6    | 0.710146000  | 10.060632000 | 9.927056000  | 6    | 3.494663000  | 3.960549000 | 6.653812000  |
| 6    | 2.049840000  | 9.349615000  | 9.923176000  | 6    | 4.727456000  | 4.702896000 | 7.021522000  |
| 6    | 2.042194000  | 8.061375000  | 9.147292000  | 6    | 5.900030000  | 3.780562000 | 7.467517000  |
| 6    | 3.268973000  | 7.474751000  | 8.842663000  | 7    | 5.337646000  | 5.339418000 | 5.695438000  |
| 6    | 3.317913000  | 6.290158000  | 8.143555000  | 6    | 6.436346000  | 3.334865000 | 6.133592000  |
| 6    | 2.153686000  | 5.654035000  | 7.727598000  | 6    | 6.123458000  | 4.242633000 | 5.138852000  |
| 6    | 0.933802000  | 6.245267000  | 8.042203000  | 6    | 5.411125000  | 2.645333000 | 8.353680000  |
| 6    | 0.847133000  | 7.439449000  | 8.748844000  | 6    | 6.977574000  | 4.578081000 | 8.209418000  |
| 6    | -0.497764000 | 8.068725000  | 9.051868000  | 6    | 4.362452000  | 5.971613000 | 4.784193000  |
| 6    | -1.618520000 | 7.048417000  | 9.267977000  | 6    | 7.178827000  | 2.213989000 | 5.807428000  |
| 6    | -2.961955000 | 7.707568000  | 9.576074000  | 6    | 6.506779000  | 4.098622000 | 3.824452000  |
| 6    | -2.853030000 | 8.686688000  | 10.735110000 | 6    | 7.586281000  | 2.041108000 | 4.489061000  |
| 6    | -2.597252000 | 7.944004000  | 12.045108000 | 6    | 7.255686000  | 2.969744000 | 3.509366000  |
| 6    | 2.289896000  | 4.418691000  | 6.997041000  | 1    | 3.621336000  | 3.042038000 | 6.095757000  |
| 1    | -5.887498000 | 9.622992000  | 11.488162000 | 1    | 1.394334000  | 3.868150000 | 6.729383000  |
| 1    | -4.318804000 | 9.991078000  | 9.900017000  | 1    | 7.434863000  | 1.480960000 | 6.563511000  |
| 1    | -3.687239000 | 10.656488000 | 12.770880000 | 1    | 8.165543000  | 1.165649000 | 4.219854000  |
| 1    | -3.930627000 | 11.759316000 | 11.423335000 | 1    | 7.577715000  | 2.814800000 | 2.486861000  |
| 1    | -1.388379000 | 10.569105000 | 12.362246000 | 1    | 6.241882000  | 4.822828000 | 3.064632000  |
| 1    | -1.575192000 | 11.773627000 | 11.097571000 | 1    | 3.780302000  | 6.695704000 | 5.350210000  |
| 1    | -2.039635000 | 10.142633000 | 9.430682000  | 1    | 4.910632000  | 6.483852000 | 3.996572000  |
| 1    | -0.132562000 | 8.521502000  | 11.126096000 | 1    | 3.718453000  | 5.204570000 | 4.363841000  |
| 1    | 0.720549000  | 10.855949000 | 10.676375000 | 1    | 7.339516000  | 5.434002000 | 7.635528000  |
| 1    | 0.527146000  | 10.537649000 | 8.956420000  | 1    | 7.827112000  | 3.919768000 | 8.396540000  |
| 1    | 2.335479000  | 9.119560000  | 10.957417000 | 1    | 6.596703000  | 4.939384000 | 9.164979000  |
| 1    | 2.839339000  | 9.998083000  | 9.532821000  | 1    | 6.264863000  | 2.058171000 | 8.696361000  |
| 1    | -0.780050000 | 8.665388000  | 8.169821000  | 1    | 4.725794000  | 1.979334000 | 7.829217000  |
| 1    | -1.331122000 | 6.370078000  | 10.078173000 | 1    | 4.904448000  | 3.047509000 | 9.233466000  |
| 1    | -1.737280000 | 6.428401000  | 8.376776000  | 1    | 5.971342000  | 6.073474000 | 6.026227000  |

**Table S18.** Optimized geometry of the protonated cationic form **CCCH** of spiropyran (**3**). The bond lengths and Cartesian coordinates of the atoms are given in Angstroms, the torsion angles - in degrees.

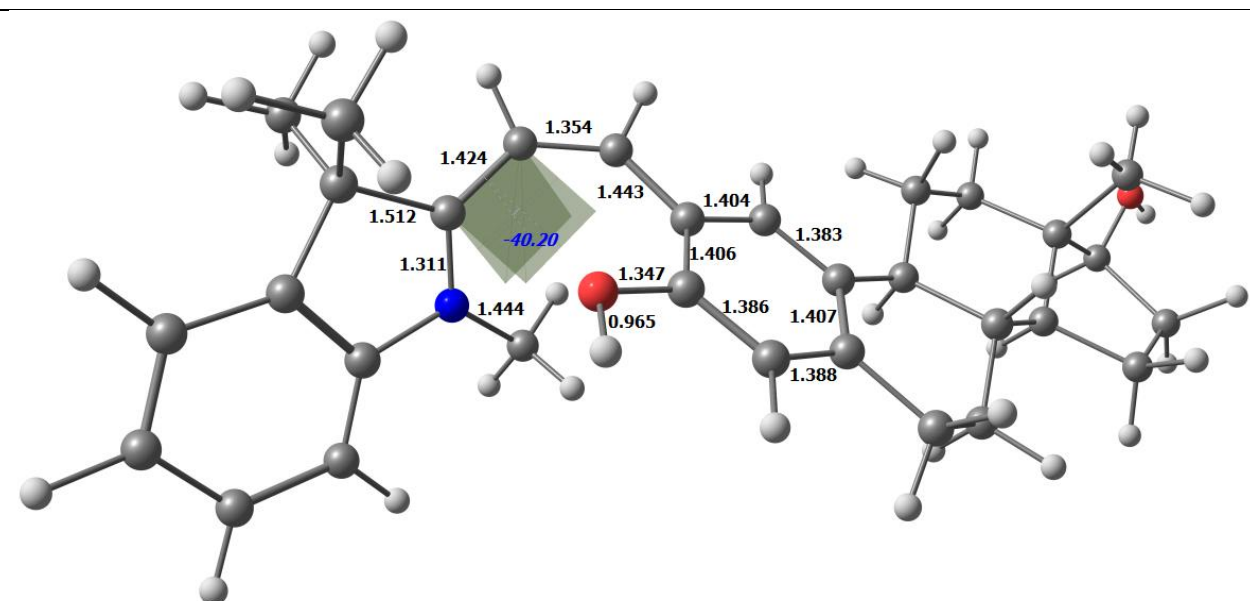

| Atom | X            | Y            | Z            | Atom | X            | Y           | Z            |
|------|--------------|--------------|--------------|------|--------------|-------------|--------------|
| 8    | -5.010526000 | 9.447940000  | 11.371749000 | 1    | -3.494369000 | 7.036745000 | 10.277459000 |
| 8    | 4.766808000  | 5.635998000  | 8.493387000  | 1    | -3.136393000 | 8.028255000 | 8.866237000  |
| 6    | -3.904740000 | 9.934156000  | 10.632577000 | 1    | -2.312867000 | 9.529071000 | 12.806147000 |
| 6    | -3.367814000 | 11.294647000 | 11.114216000 | 1    | -3.253789000 | 8.056755000 | 12.573587000 |
| 6    | -1.846836000 | 11.261494000 | 10.851951000 | 1    | -1.514285000 | 8.049360000 | 12.285123000 |
| 6    | -1.632804000 | 9.935917000  | 10.122031000 | 1    | 4.351870000  | 8.118991000 | 9.207627000  |
| 6    | -0.256220000 | 9.308939000  | 10.081901000 | 1    | 0.282522000  | 5.463218000 | 8.557142000  |
| 6    | 0.816171000  | 10.228155000 | 9.526371000  | 6    | 3.242354000  | 3.252965000 | 7.422111000  |
| 6    | 2.180722000  | 9.583596000  | 9.674481000  | 6    | 4.427304000  | 3.561868000 | 6.695800000  |
| 6    | 2.211695000  | 8.146700000  | 9.238564000  | 6    | 5.652085000  | 2.674906000 | 6.700088000  |
| 6    | 3.445389000  | 7.541150000  | 9.046770000  | 7    | 4.605577000  | 4.577374000 | 5.885473000  |
| 6    | 3.562483000  | 6.218039000  | 8.651783000  | 6    | 6.578732000  | 3.452424000 | 5.809394000  |
| 6    | 2.401646000  | 5.451993000  | 8.442918000  | 6    | 5.911289000  | 4.575112000 | 5.344076000  |
| 6    | 1.167662000  | 6.073994000  | 8.690434000  | 6    | 5.312861000  | 1.306481000 | 6.090951000  |
| 6    | 1.033140000  | 7.400097000  | 9.057537000  | 6    | 6.196245000  | 2.508874000 | 8.121043000  |
| 6    | -0.329947000 | 8.038801000  | 9.224120000  | 6    | 3.624034000  | 5.564574000 | 5.501393000  |
| 6    | -1.408654000 | 7.075506000  | 9.722988000  | 6    | 7.880559000  | 3.220250000 | 5.415355000  |
| 6    | -2.773213000 | 7.748392000  | 9.862909000  | 6    | 6.483042000  | 5.501463000 | 4.494953000  |
| 6    | -2.695455000 | 9.003653000  | 10.718730000 | 6    | 8.484914000  | 4.138289000 | 4.559725000  |
| 6    | -2.422201000 | 8.643048000  | 12.178260000 | 6    | 7.797008000  | 5.260484000 | 4.108685000  |
| 6    | 2.369190000  | 4.056874000  | 8.074677000  | 1    | 3.037262000  | 2.187497000 | 7.471248000  |
| 1    | -5.754137000 | 10.037440000 | 11.214671000 | 1    | 1.478047000  | 3.546117000 | 8.431952000  |
| 1    | -4.187216000 | 10.007888000 | 9.573093000  | 1    | 8.422007000  | 2.348292000 | 5.764361000  |
| 1    | -3.587505000 | 11.402610000 | 12.179079000 | 1    | 9.508373000  | 3.978370000 | 4.241631000  |
| 1    | -3.861847000 | 12.119610000 | 10.597188000 | 1    | 8.291084000  | 5.961502000 | 3.446740000  |
| 1    | -1.287978000 | 11.279464000 | 11.791707000 | 1    | 5.947746000  | 6.376352000 | 4.148828000  |
| 1    | -1.506657000 | 12.114136000 | 10.262217000 | 1    | 2.629701000  | 5.180973000 | 5.712186000  |
| 1    | -1.931390000 | 10.096010000 | 9.074192000  | 1    | 3.785532000  | 6.491381000 | 6.054097000  |
| 1    | 0.039720000  | 9.026773000  | 11.101925000 | 1    | 3.729966000  | 5.756721000 | 4.434940000  |
| 1    | 0.808497000  | 11.189869000 | 10.045189000 | 1    | 6.425568000  | 3.475561000 | 8.569519000  |
| 1    | 0.602042000  | 10.431737000 | 8.470219000  | 1    | 7.107897000  | 1.910405000 | 8.084020000  |
| 1    | 2.480332000  | 9.619646000  | 10.729661000 | 1    | 5.465694000  | 1.993425000 | 8.746836000  |
| 1    | 2.946039000  | 10.141415000 | 9.127532000  | 1    | 6.230129000  | 0.719453000 | 6.023928000  |
| 1    | -0.646048000 | 8.376754000  | 8.224397000  | 1    | 4.890644000  | 1.411831000 | 5.090234000  |
| 1    | -1.091924000 | 6.648323000  | 10.680300000 | 1    | 4.605503000  | 0.768280000 | 6.723539000  |
| 1    | -1.511635000 | 6.235741000  | 9.032141000  | 1    | 5.467192000  | 6.254680000 | 8.733871000  |

**Table S19.** Optimized geometry of the protonated cationic form **TCCH** of spiropyran (**3**). The bond lengths and Cartesian coordinates of the atoms are given in Angstroms, the torsion angles - in degrees.

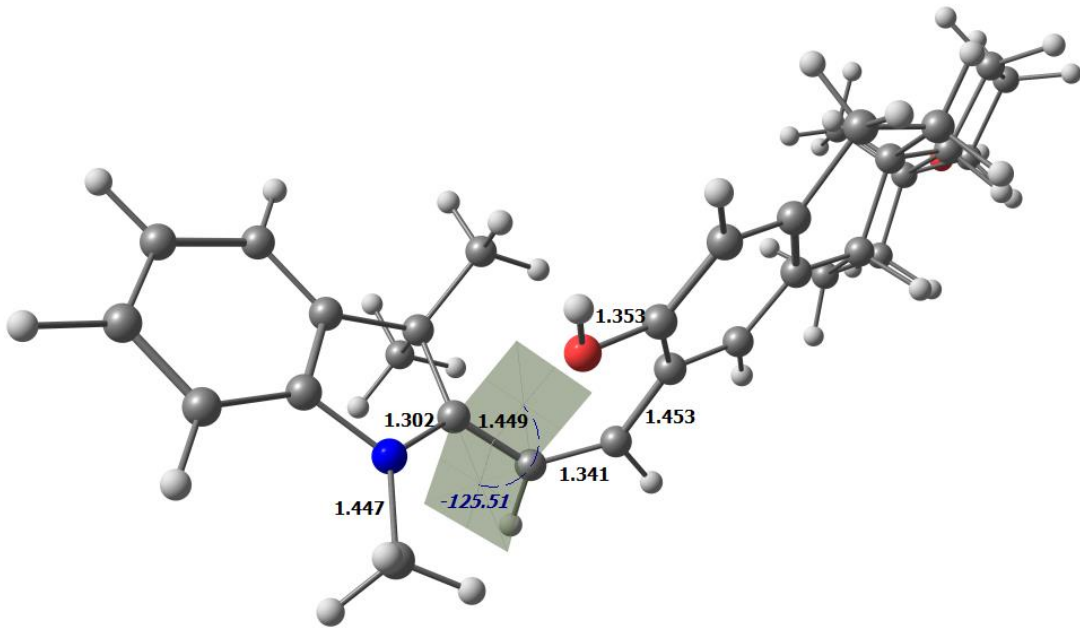

| Atom | X            | Y            | Z            | Atom | X            | Y           | Z            |
|------|--------------|--------------|--------------|------|--------------|-------------|--------------|
| 8    | -4.161518000 | 8.262523000  | 12.762822000 | 1    | -3.117827000 | 6.542292000 | 10.472510000 |
| 8    | 4.098109000  | 6.756782000  | 5.867929000  | 1    | -3.275356000 | 7.962485000 | 9.440896000  |
| 6    | -3.408395000 | 9.097041000  | 11.901090000 | 1    | -1.152692000 | 8.253929000 | 13.163341000 |
| 6    | -2.760272000 | 10.308000000 | 12.598121000 | 1    | -2.082529000 | 6.811723000 | 12.761162000 |
| 6    | -1.431247000 | 10.558834000 | 11.854400000 | 1    | -0.555434000 | 7.135161000 | 11.942106000 |
| 6    | -1.465041000 | 9.558472000  | 10.699940000 | 1    | 3.861981000  | 8.913133000 | 7.349396000  |
| 6    | -0.176773000 | 9.161713000  | 10.011843000 | 1    | -0.087691000 | 6.008789000 | 7.285314000  |
| 6    | 0.603812000  | 10.341415000 | 9.460871000  | 6    | 2.752068000  | 4.140899000 | 5.452757000  |
| 6    | 1.949774000  | 9.882322000  | 8.931060000  | 6    | 4.151444000  | 4.063769000 | 5.822482000  |
| 6    | 1.877776000  | 8.626098000  | 8.108862000  | 6    | 4.691245000  | 3.692711000 | 7.186833000  |
| 6    | 2.989770000  | 8.264205000  | 7.355938000  | 7    | 5.112930000  | 4.058094000 | 4.944236000  |
| 6    | 3.021863000  | 7.096533000  | 6.614365000  | 6    | 6.164794000  | 3.617798000 | 6.905074000  |
| 6    | 1.906916000  | 6.247684000  | 6.608904000  | 6    | 6.369040000  | 3.818097000 | 5.548830000  |
| 6    | 0.781379000  | 6.654709000  | 7.331494000  | 6    | 4.133710000  | 2.286655000 | 7.499609000  |
| 6    | 0.736821000  | 7.809466000  | 8.098109000  | 6    | 4.330853000  | 4.646977000 | 8.320888000  |
| 6    | -0.511261000 | 8.202403000  | 8.861676000  | 6    | 4.975114000  | 4.306940000 | 3.525425000  |
| 6    | -1.348874000 | 7.009119000  | 9.325605000  | 6    | 7.247119000  | 3.374707000 | 7.726400000  |
| 6    | -2.589366000 | 7.430590000  | 10.111836000 | 6    | 7.611260000  | 3.783357000 | 4.949059000  |
| 6    | -2.232512000 | 8.356052000  | 11.265274000 | 6    | 8.515052000  | 3.336168000 | 7.151352000  |
| 6    | -1.455657000 | 7.601306000  | 12.342631000 | 6    | 8.693895000  | 3.535480000 | 5.785689000  |
| 6    | 1.813405000  | 5.010965000  | 5.852665000  | 1    | 2.439299000  | 3.337216000 | 4.788978000  |
| 1    | -4.922551000 | 8.763068000  | 13.071687000 | 1    | 0.802161000  | 4.768667000 | 5.535498000  |
| 1    | -4.055754000 | 9.448757000  | 11.085606000 | 1    | 7.118123000  | 3.216142000 | 8.790893000  |
| 1    | -2.590258000 | 10.060883000 | 13.648749000 | 1    | 9.378708000  | 3.147089000 | 7.777966000  |
| 1    | -3.421361000 | 11.176584000 | 12.573801000 | 1    | 9.691518000  | 3.499256000 | 5.364968000  |
| 1    | -0.574717000 | 10.363729000 | 12.505872000 | 1    | 7.744508000  | 3.940233000 | 3.886144000  |
| 1    | -1.338001000 | 11.587843000 | 11.503766000 | 1    | 3.937324000  | 4.534109000 | 3.300509000  |
| 1    | -2.115202000 | 9.986340000  | 9.921037000  | 1    | 5.605456000  | 5.155186000 | 3.256768000  |
| 1    | 0.467750000  | 8.637755000  | 10.731452000 | 1    | 5.300021000  | 3.424446000 | 2.973609000  |
| 1    | 0.755670000  | 11.100346000 | 10.232462000 | 1    | 4.734199000  | 5.642818000 | 8.147834000  |
| 1    | 0.019242000  | 10.811575000 | 8.660802000  | 1    | 4.757587000  | 4.251228000 | 9.244047000  |
| 1    | 2.619294000  | 9.687027000  | 9.778295000  | 1    | 3.249926000  | 4.710730000 | 8.443646000  |
| 1    | 2.433053000  | 10.669803000 | 8.345635000  | 1    | 4.587502000  | 1.936232000 | 8.427391000  |
| 1    | -1.145169000 | 8.782422000  | 8.171969000  | 1    | 4.369743000  | 1.578700000 | 6.703247000  |
| 1    | -0.722177000 | 6.343889000  | 9.929307000  | 1    | 3.051518000  | 2.335920000 | 7.627822000  |
| 1    | -1.672940000 | 6.422883000  | 8.462695000  | 1    | 4.783752000  | 7.430162000 | 5.951995000  |



**Table S20.** Optimized geometry of **TS<sup>5</sup> (CCCH-to-CTCH)** of the protonated spiropyran (**3**). The bond lengths and Cartesian coordinates of the atoms are given in Angstroms, the torsion angles - in degrees.

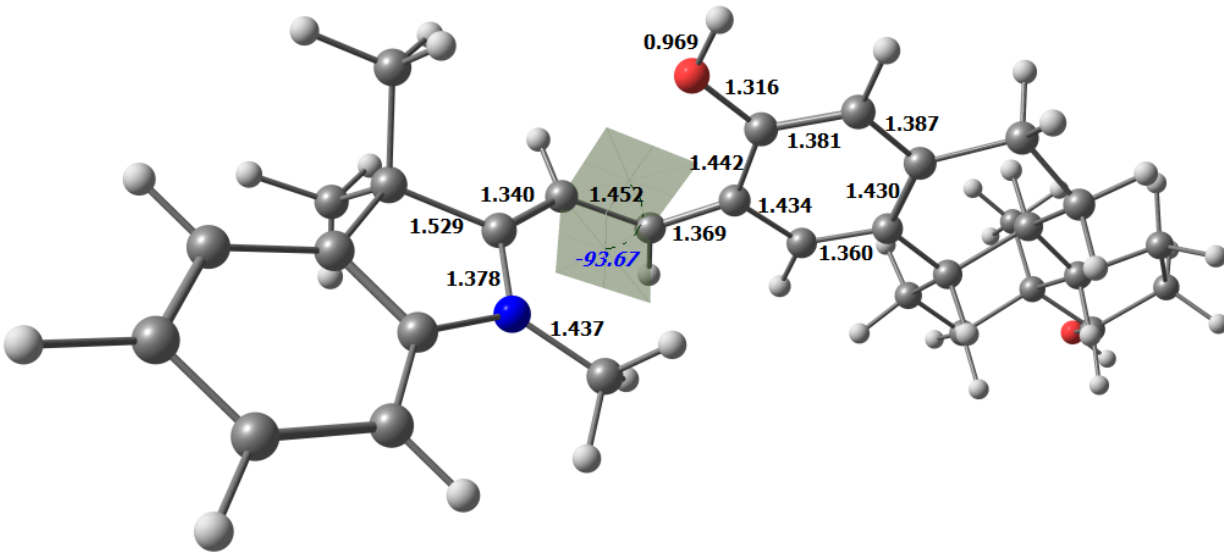

$\nu_{\text{im}} = -747.97 \text{ cm}^{-1}$

| Atom | X            | Y            | Z            | Atom | X            | Y           | Z            |
|------|--------------|--------------|--------------|------|--------------|-------------|--------------|
| 8    | -5.276032000 | 9.308197000  | 10.767770000 | 1    | -3.542034000 | 7.109984000 | 9.565736000  |
| 8    | 4.949217000  | 5.979832000  | 9.309047000  | 1    | -2.964117000 | 8.317058000 | 8.419773000  |
| 6    | -4.077436000 | 9.907012000  | 10.310294000 | 1    | -2.859438000 | 9.157570000 | 12.631031000 |
| 6    | -3.664991000 | 11.173728000 | 11.082322000 | 1    | -3.712942000 | 7.744108000 | 12.013574000 |
| 6    | -2.121319000 | 11.185544000 | 11.073486000 | 1    | -1.949779000 | 7.777735000 | 12.025059000 |
| 6    | -1.752940000 | 9.986959000  | 10.199825000 | 1    | 4.350965000  | 8.393272000 | 10.126284000 |
| 6    | -0.373341000 | 9.376189000  | 10.309764000 | 1    | 0.528468000  | 5.755731000 | 8.448396000  |
| 6    | 0.744388000  | 10.372829000 | 10.066066000 | 6    | 3.940931000  | 3.730621000 | 7.955071000  |
| 6    | 2.090075000  | 9.727797000  | 10.327449000 | 6    | 4.750312000  | 3.673837000 | 6.888170000  |
| 6    | 2.243464000  | 8.356642000  | 9.761818000  | 6    | 5.972451000  | 2.758966000 | 6.804725000  |
| 6    | 3.517447000  | 7.807958000  | 9.750274000  | 7    | 4.665955000  | 4.402039000 | 5.721344000  |
| 6    | 3.753650000  | 6.528665000  | 9.287695000  | 6    | 6.575754000  | 3.185856000 | 5.488889000  |
| 6    | 2.645374000  | 5.762937000  | 8.773955000  | 6    | 5.763122000  | 4.157987000 | 4.906342000  |
| 6    | 1.342493000  | 6.359827000  | 8.829465000  | 6    | 5.540924000  | 1.291835000 | 6.762492000  |
| 6    | 1.112795000  | 7.618521000  | 9.291222000  | 6    | 6.931818000  | 2.997608000 | 7.967904000  |
| 6    | -0.263710000 | 8.244160000  | 9.278723000  | 6    | 3.644413000  | 5.365086000 | 5.415203000  |
| 6    | -1.395046000 | 7.222560000  | 9.403954000  | 6    | 7.722820000  | 2.766138000 | 4.853675000  |
| 6    | -2.776112000 | 7.875247000  | 9.406038000  | 6    | 6.086980000  | 4.738200000 | 3.689757000  |
| 6    | -2.875628000 | 8.974044000  | 10.453241000 | 6    | 8.063586000  | 3.332090000 | 3.622482000  |
| 6    | -2.841366000 | 8.383408000  | 11.861925000 | 6    | 7.251977000  | 4.306010000 | 3.057502000  |
| 6    | 2.753866000  | 4.539104000  | 8.169773000  | 1    | 4.180396000  | 3.077927000 | 8.793953000  |
| 1    | -5.999623000 | 9.914433000  | 10.582948000 | 1    | 1.798657000  | 4.114907000 | 7.852289000  |
| 1    | -4.180962000 | 10.148179000 | 9.243106000  | 1    | 8.355678000  | 2.008358000 | 5.304125000  |
| 1    | -4.056873000 | 11.109041000 | 12.100114000 | 1    | 8.965002000  | 3.014904000 | 3.111637000  |
| 1    | -4.091272000 | 12.069957000 | 10.627595000 | 1    | 7.526551000  | 4.746905000 | 2.105619000  |
| 1    | -1.724553000 | 11.062653000 | 12.085131000 | 1    | 5.469644000  | 5.506050000 | 3.240118000  |
| 1    | -1.713772000 | 12.118326000 | 10.680762000 | 1    | 2.674023000  | 5.005124000 | 5.758190000  |
| 1    | -1.867874000 | 10.304973000 | 9.151792000  | 1    | 3.846674000  | 6.339685000 | 5.871131000  |
| 1    | -0.242154000 | 8.956060000  | 11.316412000 | 1    | 3.577085000  | 5.490218000 | 4.335145000  |
| 1    | 0.634314000  | 11.245485000 | 10.712963000 | 1    | 7.233767000  | 4.045358000 | 8.017630000  |
| 1    | 0.688174000  | 10.730076000 | 9.031445000  | 1    | 7.826432000  | 2.383925000 | 7.840655000  |
| 1    | 2.239159000  | 9.623406000  | 11.411669000 | 1    | 6.461941000  | 2.725097000 | 8.915570000  |
| 1    | 2.921767000  | 10.348567000 | 9.981836000  | 1    | 6.415463000  | 0.651437000 | 6.626135000  |
| 1    | -0.376054000 | 8.731435000  | 8.297778000  | 1    | 4.847300000  | 1.112374000 | 5.938569000  |
| 1    | -1.246918000 | 6.637166000  | 10.317229000 | 1    | 5.050238000  | 1.013911000 | 7.698260000  |
| 1    | -1.352876000 | 6.513760000  | 8.573676000  | 1    | 5.601483000  | 6.592215000 | 9.681165000  |

**Table S21.** Optimized geometry of the protonated cationic form **CTCH** of spiropyran (**3**). The bond lengths and Cartesian coordinates of the atoms are given in Angstroms, the torsion angles - in degrees.

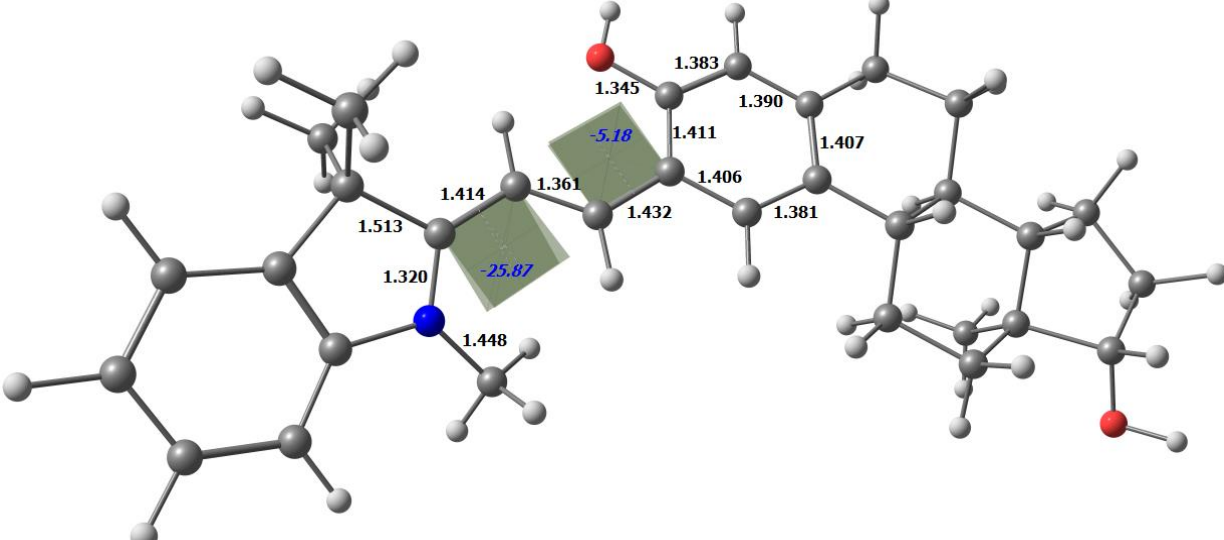

| Atom | X            | Y            | Z            | Atom | X            | Y           | Z            |
|------|--------------|--------------|--------------|------|--------------|-------------|--------------|
| 8    | -4.955595000 | 10.087812000 | 9.066196000  | 1    | -2.735882000 | 8.460140000 | 7.740916000  |
| 8    | 4.834788000  | 5.576599000  | 10.543334000 | 1    | -1.713802000 | 9.886498000 | 7.902979000  |
| 6    | -3.719690000 | 10.504109000 | 9.619254000  | 1    | -3.828139000 | 8.387042000 | 11.326318000 |
| 6    | -3.820026000 | 11.043087000 | 11.058742000 | 1    | -4.174489000 | 7.769198000 | 9.711741000  |
| 6    | -2.499417000 | 10.643594000 | 11.750609000 | 1    | -2.672456000 | 7.329152000 | 10.523339000 |
| 6    | -1.673478000 | 10.021597000 | 10.625578000 | 1    | 3.689050000  | 7.129452000 | 12.310398000 |
| 6    | -0.518473000 | 9.102846000  | 10.958979000 | 1    | 1.468572000  | 7.018853000 | 7.938357000  |
| 6    | 0.504184000  | 9.719801000  | 11.894631000 | 6    | 4.661027000  | 4.761312000 | 7.812872000  |
| 6    | 1.530507000  | 8.679673000  | 12.301277000 | 6    | 5.065411000  | 4.092595000 | 6.634009000  |
| 6    | 2.048526000  | 7.868707000  | 11.149594000 | 6    | 6.520103000  | 3.772644000 | 6.365517000  |
| 6    | 3.193212000  | 7.104831000  | 11.343665000 | 7    | 4.316981000  | 3.652848000 | 5.639192000  |
| 6    | 3.727600000  | 6.313616000  | 10.342433000 | 6    | 6.441574000  | 3.141091000 | 5.006540000  |
| 6    | 3.097691000  | 6.275023000  | 9.080396000  | 6    | 5.112602000  | 3.092498000 | 4.613658000  |
| 6    | 1.939380000  | 7.054995000  | 8.913738000  | 6    | 7.042997000  | 2.781699000 | 7.414417000  |
| 6    | 1.394991000  | 7.848822000  | 9.903853000  | 6    | 7.360104000  | 5.053384000 | 6.362228000  |
| 6    | 0.169726000  | 8.700908000  | 9.648452000  | 6    | 2.871188000  | 3.637785000 | 5.569228000  |
| 6    | -0.814533000 | 8.083361000  | 8.652395000  | 6    | 7.422601000  | 2.645497000 | 4.173244000  |
| 6    | -2.036047000 | 8.969254000  | 8.411193000  | 6    | 4.704375000  | 2.571416000 | 3.400990000  |
| 6    | -2.714960000 | 9.356494000  | 9.716367000  | 6    | 7.039754000  | 2.111914000 | 2.944957000  |
| 6    | -3.380442000 | 8.142042000  | 10.361476000 | 6    | 5.701765000  | 2.077668000 | 2.566754000  |
| 6    | 3.534336000  | 5.511778000  | 7.950675000  | 1    | 5.384865000  | 4.737224000 | 8.614637000  |
| 1    | -5.506009000 | 10.867718000 | 8.947938000  | 1    | 2.880892000  | 5.617535000 | 7.091957000  |
| 1    | -3.278771000 | 11.274550000 | 8.971504000  | 1    | 8.466798000  | 2.672417000 | 4.463686000  |
| 1    | -4.682955000 | 10.584432000 | 11.547505000 | 1    | 7.794302000  | 1.720875000 | 2.272748000  |
| 1    | -3.982627000 | 12.122730000 | 11.064407000 | 1    | 5.427150000  | 1.662590000 | 1.604384000  |
| 1    | -2.679130000 | 9.913804000  | 12.545052000 | 1    | 3.665245000  | 2.550468000 | 3.098626000  |
| 1    | -1.993577000 | 11.495362000 | 12.208056000 | 1    | 2.499323000  | 4.540371000 | 5.081777000  |
| 1    | -1.252158000 | 10.853265000 | 10.039709000 | 1    | 2.563171000  | 2.766599000 | 4.995294000  |
| 1    | -0.910873000 | 8.197665000  | 11.442802000 | 1    | 2.463324000  | 3.566780000 | 6.575616000  |
| 1    | 0.019392000  | 10.121461000 | 12.787710000 | 1    | 6.983595000  | 5.767954000 | 5.628372000  |
| 1    | 0.993222000  | 10.561546000 | 11.389365000 | 1    | 8.391038000  | 4.801471000 | 6.108351000  |
| 1    | 1.071299000  | 7.984714000  | 13.016121000 | 1    | 7.347935000  | 5.519906000 | 7.348592000  |
| 1    | 2.373961000  | 9.134727000  | 12.828021000 | 1    | 8.064457000  | 2.501925000 | 7.151669000  |
| 1    | 0.523300000  | 9.643701000  | 9.201657000  | 1    | 6.429267000  | 1.879930000 | 7.444215000  |
| 1    | -1.121508000 | 7.097790000  | 9.017932000  | 1    | 7.054588000  | 3.237988000 | 8.405403000  |
| 1    | -0.321304000 | 7.913262000  | 7.692782000  | 1    | 5.154001000  | 5.702406000 | 11.445784000 |

**Table S22.** Optimized geometry of **TS<sup>6</sup> (CTCH-to-TTCH)** of the protonated spiropyran (**3**). The bond lengths and Cartesian coordinates of the atoms are given in Angstroms, the torsion angles - in degrees.

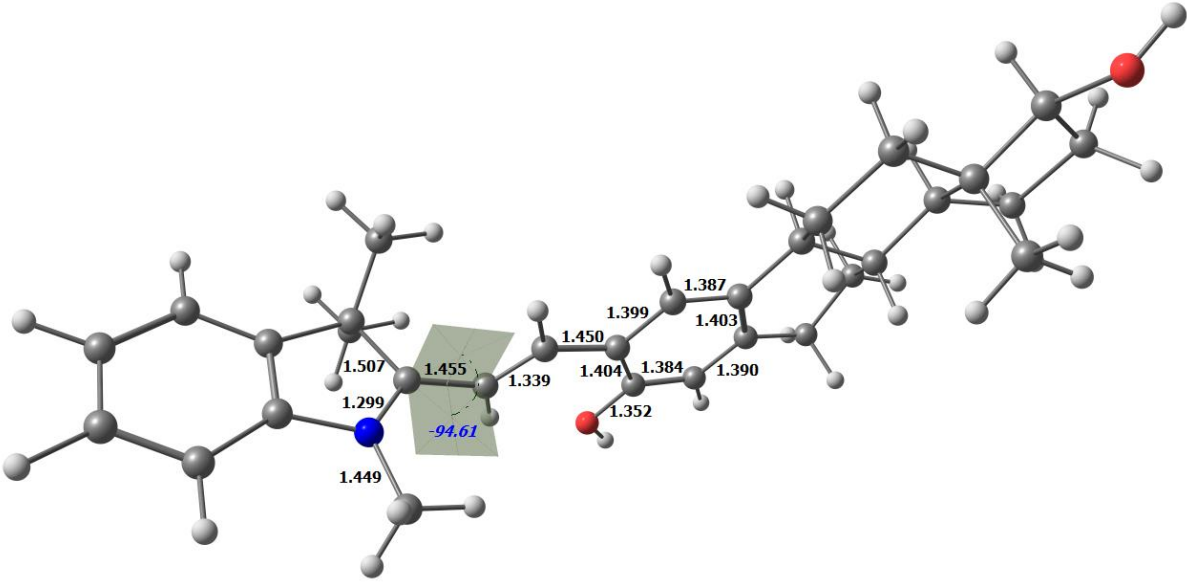

$\nu_{\text{im}} = -125.23 \text{ cm}^{-1}$

| Atom | X            | Y            | Z            | Atom | X            | Y            | Z            |
|------|--------------|--------------|--------------|------|--------------|--------------|--------------|
| 8    | -4.315060000 | 11.052142000 | 8.667123000  | 1    | -2.173366000 | 9.254827000  | 7.438401000  |
| 8    | 4.253048000  | 4.662132000  | 10.785501000 | 1    | -0.994060000 | 10.422190000 | 8.029627000  |
| 6    | -3.166825000 | 11.120541000 | 9.493551000  | 1    | -3.953730000 | 8.815594000  | 10.695808000 |
| 6    | -3.470043000 | 11.412708000 | 10.974780000 | 1    | -4.048758000 | 8.539356000  | 8.957203000  |
| 6    | -2.385358000 | 10.666395000 | 11.780706000 | 1    | -2.833727000 | 7.700622000  | 9.920368000  |
| 6    | -1.461232000 | 10.096287000 | 10.705569000 | 1    | 2.998281000  | 6.043646000  | 12.621811000 |
| 6    | -0.544262000 | 8.937779000  | 11.032046000 | 1    | 1.693678000  | 7.099632000  | 8.016873000  |
| 6    | 0.357879000  | 9.191783000  | 12.226075000 | 6    | 4.485820000  | 4.355553000  | 7.977688000  |
| 6    | 1.116243000  | 7.927108000  | 12.580339000 | 6    | 4.991702000  | 3.868269000  | 6.703832000  |
| 6    | 1.728521000  | 7.249537000  | 11.386665000 | 6    | 6.131592000  | 4.484646000  | 5.935255000  |
| 6    | 2.699396000  | 6.278162000  | 11.603027000 | 7    | 4.560885000  | 2.799901000  | 6.104442000  |
| 6    | 3.308335000  | 5.602737000  | 10.559688000 | 6    | 6.252437000  | 3.534675000  | 4.778637000  |
| 6    | 2.946311000  | 5.898908000  | 9.235496000  | 6    | 5.294457000  | 2.542343000  | 4.916633000  |
| 6    | 1.962576000  | 6.874987000  | 9.042751000  | 6    | 7.389725000  | 4.509322000  | 6.812916000  |
| 6    | 1.338760000  | 7.559418000  | 10.075437000 | 6    | 5.759232000  | 5.904167000  | 5.490531000  |
| 6    | 0.316798000  | 8.643244000  | 9.797099000  | 6    | 3.488007000  | 1.933870000  | 6.550802000  |
| 6    | -0.542929000 | 8.385610000  | 8.557320000  | 6    | 7.106242000  | 3.508023000  | 3.694505000  |
| 6    | -1.543727000 | 9.510970000  | 8.296673000  | 6    | 5.132308000  | 1.503414000  | 4.023970000  |
| 6    | -2.394835000 | 9.801715000  | 9.523900000  | 6    | 6.969379000  | 2.470899000  | 2.775563000  |
| 6    | -3.359056000 | 8.647694000  | 9.796242000  | 6    | 5.999897000  | 1.485540000  | 2.937602000  |
| 6    | 3.521430000  | 5.281776000  | 8.055799000  | 1    | 4.972246000  | 3.949894000  | 8.857751000  |
| 1    | -4.719813000 | 11.924538000 | 8.649858000  | 1    | 3.093522000  | 5.639782000  | 7.121968000  |
| 1    | -2.488299000 | 11.890416000 | 9.100121000  | 1    | 7.865381000  | 4.269885000  | 3.559981000  |
| 1    | -4.469463000 | 11.037807000 | 11.208318000 | 1    | 7.630303000  | 2.428724000  | 1.917888000  |
| 1    | -3.472820000 | 12.486265000 | 11.173265000 | 1    | 5.917446000  | 0.690002000  | 2.206993000  |
| 1    | -2.825997000 | 9.862727000  | 12.377310000 | 1    | 4.376479000  | 0.739445000  | 4.154897000  |
| 1    | -1.854650000 | 11.322992000 | 12.471851000 | 1    | 2.721075000  | 1.897946000  | 5.777166000  |
| 1    | -0.810834000 | 10.920339000 | 10.372702000 | 1    | 3.888700000  | 0.932993000  | 6.712187000  |
| 1    | -1.151173000 | 8.049696000  | 11.256924000 | 1    | 3.072823000  | 2.330412000  | 7.472741000  |
| 1    | -0.225786000 | 9.523537000  | 13.088335000 | 1    | 4.846601000  | 5.907531000  | 4.892337000  |
| 1    | 1.056501000  | 10.000971000 | 11.980798000 | 1    | 6.576238000  | 6.301263000  | 4.886459000  |
| 1    | 0.426709000  | 7.218623000  | 13.056793000 | 1    | 5.620316000  | 6.547784000  | 6.359919000  |
| 1    | 1.896891000  | 8.127815000  | 13.319574000 | 1    | 8.215488000  | 4.913326000  | 6.225704000  |
| 1    | 0.879863000  | 9.570001000  | 9.602286000  | 1    | 7.656085000  | 3.506829000  | 7.151668000  |
| 1    | -1.065015000 | 7.430264000  | 8.677117000  | 1    | 7.229263000  | 5.150491000  | 7.681073000  |
| 1    | 0.091718000  | 8.279901000  | 7.674752000  | 1    | 4.392058000  | 4.564484000  | 11.735172000 |

**Table S23.** Optimized geometry of the protonated cationic form **TTCH** of spiropyran (**3**). The bond lengths and Cartesian coordinates of the atoms are given in Angstroms, the torsion angles - in degrees.

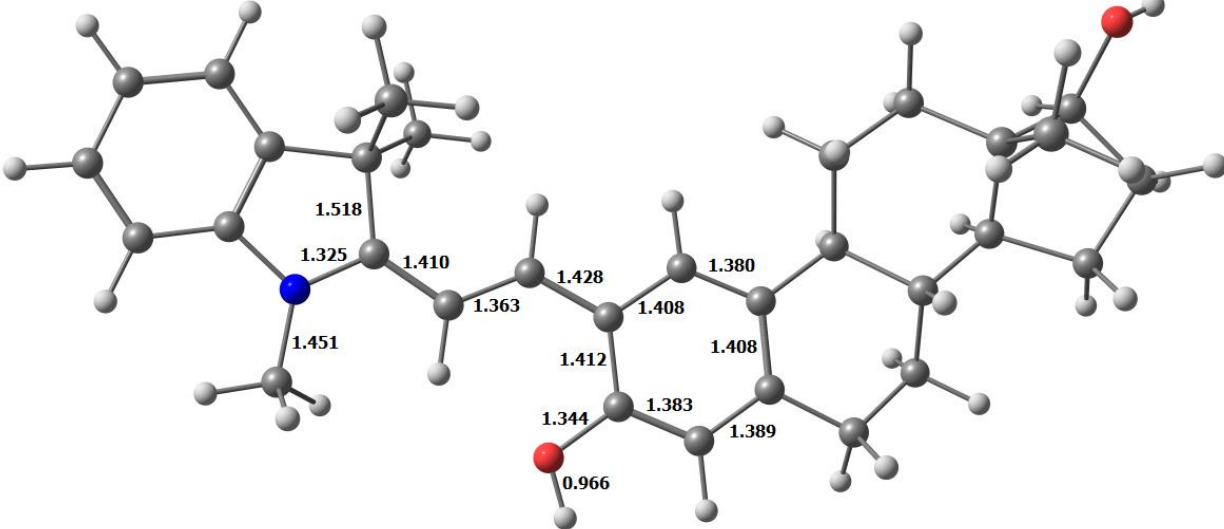

| Atom | X            | Y            | Z            | Atom | X            | Y            | Z            |
|------|--------------|--------------|--------------|------|--------------|--------------|--------------|
| 8    | -3.174381000 | 12.257038000 | 8.667194000  | 1    | -1.038982000 | 10.426134000 | 7.478791000  |
| 8    | 3.304954000  | 3.720236000  | 10.625998000 | 1    | 0.059782000  | 11.075855000 | 8.693329000  |
| 6    | -2.332014000 | 11.831997000 | 9.723085000  | 1    | -3.770275000 | 9.532966000  | 9.875195000  |
| 6    | -3.022031000 | 11.773173000 | 11.098270000 | 1    | -3.370346000 | 9.766265000  | 8.173954000  |
| 6    | -2.350207000 | 10.607430000 | 11.854694000 | 1    | -2.639035000 | 8.442585000  | 9.080678000  |
| 6    | -1.239126000 | 10.152631000 | 10.909799000 | 1    | 1.836348000  | 4.854996000  | 12.465807000 |
| 6    | -0.641480000 | 8.770731000  | 11.058237000 | 1    | 2.009004000  | 7.278806000  | 8.203211000  |
| 6    | -0.098178000 | 8.497288000  | 12.449045000 | 6    | 4.179596000  | 4.026554000  | 7.933797000  |
| 6    | 0.351935000  | 7.053951000  | 12.563773000 | 6    | 4.844709000  | 3.711258000  | 6.731150000  |
| 6    | 1.166135000  | 6.583578000  | 11.394498000 | 6    | 4.855902000  | 4.456713000  | 5.408386000  |
| 6    | 1.872379000  | 5.394171000  | 11.522903000 | 7    | 5.592728000  | 2.621533000  | 6.634669000  |
| 6    | 2.623195000  | 4.869997000  | 10.486361000 | 6    | 5.745838000  | 3.566908000  | 4.581834000  |
| 6    | 2.676161000  | 5.555716000  | 9.253045000  | 6    | 6.160194000  | 2.490863000  | 5.352659000  |
| 6    | 1.953111000  | 6.759869000  | 9.152864000  | 6    | 5.486338000  | 5.849067000  | 5.546933000  |
| 6    | 1.205650000  | 7.297426000  | 10.181179000 | 6    | 3.454733000  | 4.527041000  | 4.786091000  |
| 6    | 0.493253000  | 8.625729000  | 10.035629000 | 6    | 5.810226000  | 1.669363000  | 7.707133000  |
| 6    | 0.025279000  | 8.927112000  | 8.610664000  | 6    | 6.165719000  | 3.680131000  | 3.273049000  |
| 6    | -0.672587000 | 10.282093000 | 8.500216000  | 6    | 6.994314000  | 1.500794000  | 4.867390000  |
| 6    | -1.804574000 | 10.413299000 | 9.507684000  | 6    | 7.005346000  | 2.695416000  | 2.758905000  |
| 6    | -2.960722000 | 9.482174000  | 9.145037000  | 6    | 7.411514000  | 1.623911000  | 3.547015000  |
| 6    | 3.401979000  | 5.133889000  | 8.097316000  | 1    | 4.303451000  | 3.341947000  | 8.758245000  |
| 1    | -3.407394000 | 13.176808000 | 8.825110000  | 1    | 3.295917000  | 5.810447000  | 7.257761000  |
| 1    | -1.462266000 | 12.501301000 | 9.779729000  | 1    | 5.852048000  | 4.515426000  | 2.657013000  |
| 1    | -4.088928000 | 11.590261000 | 10.949286000 | 1    | 7.347632000  | 2.764374000  | 1.733169000  |
| 1    | -2.928307000 | 12.723144000 | 11.628226000 | 1    | 8.065826000  | 0.868319000  | 3.128847000  |
| 1    | -3.062027000 | 9.796635000  | 12.034210000 | 1    | 7.318748000  | 0.663375000  | 5.470946000  |
| 1    | -1.960512000 | 10.911120000 | 12.827558000 | 1    | 6.465172000  | 0.879761000  | 7.354088000  |
| 1    | -0.406020000 | 10.862508000 | 11.030168000 | 1    | 6.276816000  | 2.168388000  | 8.556926000  |
| 1    | -1.412110000 | 8.018023000  | 10.841361000 | 1    | 4.859227000  | 1.234241000  | 8.015187000  |
| 1    | -0.856141000 | 8.704636000  | 13.208176000 | 1    | 3.009888000  | 3.532927000  | 4.718235000  |
| 1    | 0.742278000  | 9.174721000  | 12.642171000 | 1    | 3.540755000  | 4.937699000  | 3.778886000  |
| 1    | -0.531596000 | 6.405850000  | 12.630802000 | 1    | 2.788663000  | 5.169430000  | 5.361368000  |
| 1    | 0.915365000  | 6.883686000  | 13.485522000 | 1    | 5.590681000  | 6.284818000  | 4.552028000  |
| 1    | 1.223652000  | 9.407075000  | 10.299433000 | 1    | 6.475947000  | 5.783364000  | 6.002051000  |
| 1    | -0.640386000 | 8.125171000  | 8.274266000  | 1    | 4.868186000  | 6.514314000  | 6.148764000  |
| 1    | 0.877969000  | 8.924577000  | 7.927888000  | 1    | 3.177717000  | 3.369145000  | 11.516451000 |

**Table S24.** Optimized geometry of the protonated cationic form **CTTH** of spiropyran (**3**). The bond lengths and Cartesian coordinates of the atoms are given in Angstroms, the torsion angles - in degrees.

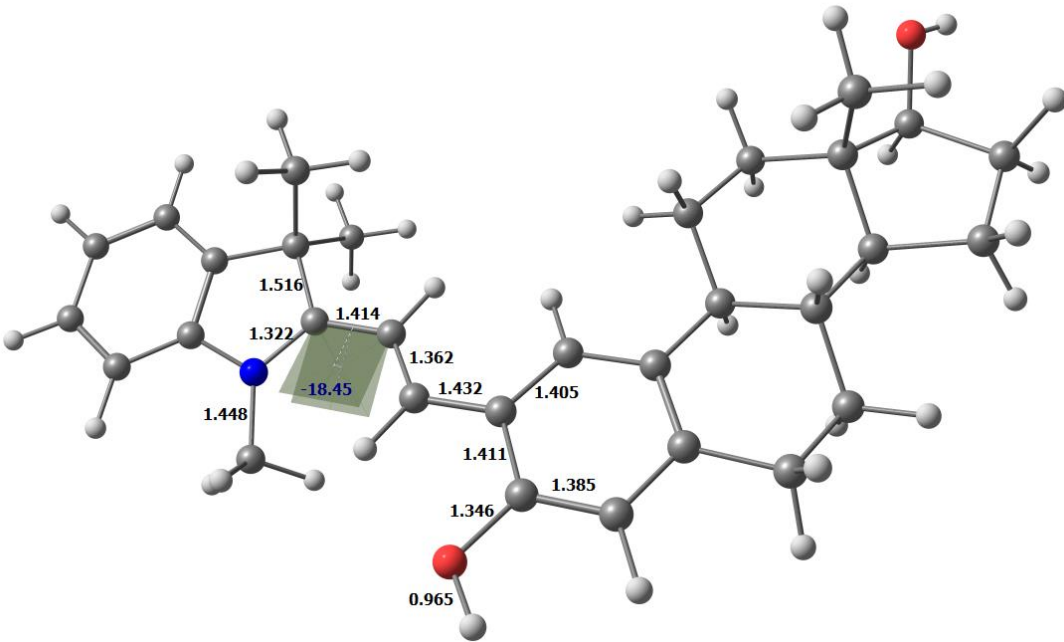

| Atom | X            | Y           | Z            | Atom | X            | Y            | Z            |
|------|--------------|-------------|--------------|------|--------------|--------------|--------------|
| 8    | -0.921914000 | 2.339911000 | 16.149981000 | 1    | 0.338439000  | 2.213196000  | 13.361199000 |
| 8    | 4.131562000  | 8.085830000 | 8.412454000  | 1    | -0.962116000 | 3.276384000  | 12.832259000 |
| 6    | -1.125398000 | 3.593627000 | 15.522035000 | 1    | 1.387267000  | 4.308877000  | 16.281357000 |
| 6    | -1.235079000 | 4.781317000 | 16.497936000 | 1    | 1.517291000  | 2.717637000  | 15.535692000 |
| 6    | -0.614540000 | 5.989445000 | 15.762847000 | 1    | 2.208108000  | 4.126794000  | 14.733833000 |
| 6    | -0.318446000 | 5.449564000 | 14.362532000 | 1    | 3.056368000  | 9.195091000  | 10.542732000 |
| 6    | 0.679448000  | 6.162329000 | 13.472120000 | 1    | 1.910802000  | 4.459762000  | 9.878550000  |
| 6    | 0.358853000  | 7.631167000 | 13.252400000 | 6    | 3.295466000  | 4.167878000  | 7.568933000  |
| 6    | 1.484789000  | 8.304638000 | 12.489592000 | 6    | 3.843699000  | 3.487279000  | 6.457681000  |
| 6    | 1.978595000  | 7.512316000 | 11.313242000 | 6    | 3.828232000  | 1.973885000  | 6.370596000  |
| 6    | 2.806873000  | 8.147320000 | 10.398131000 | 7    | 4.409648000  | 3.993938000  | 5.375133000  |
| 6    | 3.325555000  | 7.478436000 | 9.302338000  | 6    | 4.560406000  | 1.742577000  | 5.080667000  |
| 6    | 2.999070000  | 6.121976000 | 9.092901000  | 6    | 4.889443000  | 2.970460000  | 4.527020000  |
| 6    | 2.160192000  | 5.501446000 | 10.034177000 | 6    | 2.378182000  | 1.471624000  | 6.286489000  |
| 6    | 1.645568000  | 6.151201000 | 11.138852000 | 6    | 4.549559000  | 1.344797000  | 7.566993000  |
| 6    | 0.719393000  | 5.446401000 | 12.112980000 | 6    | 4.499644000  | 5.390636000  | 5.005335000  |
| 6    | 1.001867000  | 3.948050000 | 12.261995000 | 6    | 4.914213000  | 0.578444000  | 4.429478000  |
| 6    | 0.053339000  | 3.264450000 | 13.248049000 | 6    | 5.582450000  | 3.096810000  | 3.337406000  |
| 6    | 0.033139000  | 3.972480000 | 14.596312000 | 6    | 5.608587000  | 0.676218000  | 3.226142000  |
| 6    | 1.362578000  | 3.778241000 | 15.327682000 | 6    | 5.938902000  | 1.917394000  | 2.692451000  |
| 6    | 3.527520000  | 5.457381000 | 7.939278000  | 1    | 2.685029000  | 3.537680000  | 8.205505000  |
| 1    | -1.719587000 | 2.120480000 | 16.640988000 | 1    | 4.198791000  | 6.063050000  | 7.346405000  |
| 1    | -2.035216000 | 3.541935000 | 14.907723000 | 1    | 4.661487000  | -0.391382000 | 4.843507000  |
| 1    | -0.683996000 | 4.540811000 | 17.410575000 | 1    | 5.899810000  | -0.225738000 | 2.700621000  |
| 1    | -2.273211000 | 4.959170000 | 16.786628000 | 1    | 6.486248000  | 1.971467000  | 1.758711000  |
| 1    | 0.306367000  | 6.315157000 | 16.255034000 | 1    | 5.851200000  | 4.058640000  | 2.919272000  |
| 1    | -1.285190000 | 6.850171000 | 15.738294000 | 1    | 5.388747000  | 5.850540000  | 5.440942000  |
| 1    | -1.274569000 | 5.444978000 | 13.815283000 | 1    | 4.555196000  | 5.459402000  | 3.921684000  |
| 1    | 1.676424000  | 6.102105000 | 13.931426000 | 1    | 3.607739000  | 5.912782000  | 5.347647000  |
| 1    | 0.210067000  | 8.143385000 | 14.206286000 | 1    | 5.574124000  | 1.712192000  | 7.648243000  |
| 1    | -0.582538000 | 7.713649000 | 12.695659000 | 1    | 4.577401000  | 0.261585000  | 7.435852000  |
| 1    | 2.336130000  | 8.455612000 | 13.165921000 | 1    | 4.020712000  | 1.565075000  | 8.495915000  |
| 1    | 1.194817000  | 9.303807000 | 12.151302000 | 1    | 2.389846000  | 0.390841000  | 6.134655000  |
| 1    | -0.299701000 | 5.535096000 | 11.703131000 | 1    | 1.847072000  | 1.935384000  | 5.453327000  |
| 1    | 2.042393000  | 3.807253000 | 12.574186000 | 1    | 1.840723000  | 1.682763000  | 7.212377000  |
| 1    | 0.904006000  | 3.449903000 | 11.294318000 | 1    | 4.282768000  | 9.001847000  | 8.675462000  |



**Table S25.** Optimized geometry of **TS<sup>7</sup> (TTCH-to-TTTH)** of the protonated spiropyran (**3**). The bond lengths and Cartesian coordinates of the atoms are given in Angstroms, the torsion angles - in degrees.

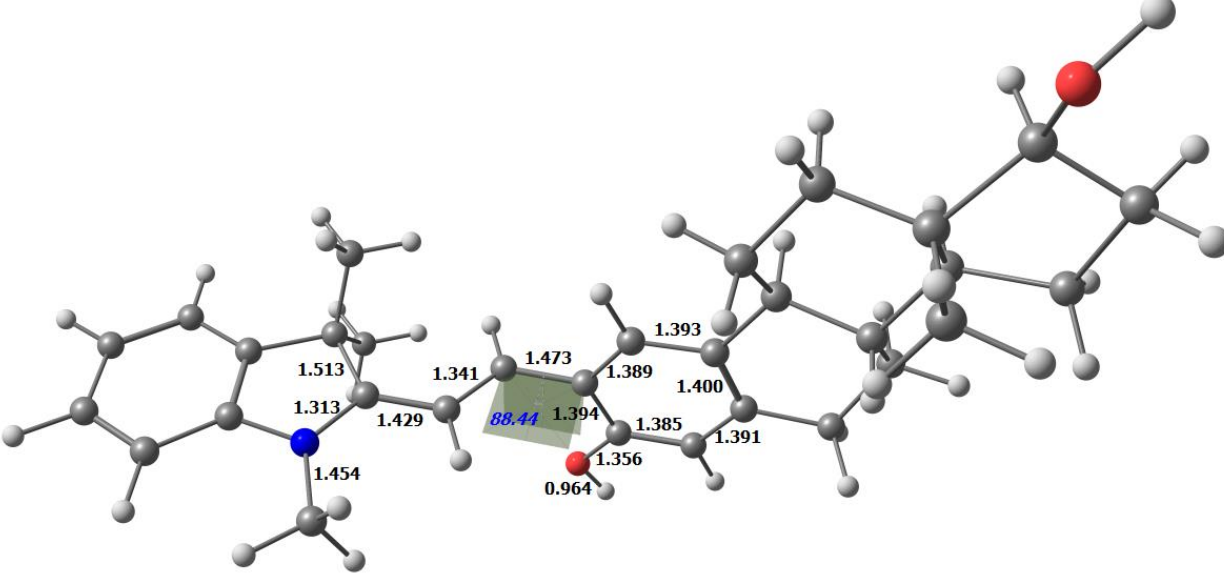

$\nu_{\text{im}} = -86.16 \text{ cm}^{-1}$

| Atom | X            | Y            | Z            | Atom | X            | Y            | Z            |
|------|--------------|--------------|--------------|------|--------------|--------------|--------------|
| 8    | -4.117710000 | 10.927733000 | 8.463625000  | 1    | -1.745807000 | 9.369014000  | 7.347623000  |
| 8    | 4.699889000  | 5.006917000  | 10.961392000 | 1    | -0.715323000 | 10.538732000 | 8.168256000  |
| 6    | -3.076283000 | 10.984535000 | 9.421842000  | 1    | -3.847454000 | 8.542855000  | 10.326981000 |
| 6    | -3.559105000 | 11.128488000 | 10.877348000 | 1    | -3.716751000 | 8.407370000  | 8.574846000  |
| 6    | -2.527332000 | 10.368682000 | 11.738585000 | 1    | -2.568813000 | 7.564877000  | 9.614507000  |
| 6    | -1.453023000 | 9.952404000  | 10.734564000 | 1    | 3.128522000  | 6.097980000  | 12.798964000 |
| 6    | -0.497055000 | 8.826622000  | 11.066944000 | 1    | 2.159147000  | 7.403063000  | 8.164969000  |
| 6    | 0.254679000  | 9.030736000  | 12.369715000 | 6    | 3.884651000  | 4.537113000  | 7.697646000  |
| 6    | 1.071496000  | 7.796040000  | 12.700030000 | 6    | 4.605397000  | 3.997862000  | 6.587465000  |
| 6    | 1.866130000  | 7.281343000  | 11.530445000 | 6    | 5.772524000  | 4.594258000  | 5.831676000  |
| 6    | 2.903940000  | 6.387924000  | 11.775605000 | 7    | 4.274053000  | 2.837880000  | 6.068090000  |
| 6    | 3.668858000  | 5.862055000  | 10.747440000 | 6    | 6.008795000  | 3.535831000  | 4.789501000  |
| 6    | 3.383495000  | 6.222561000  | 9.431058000  | 6    | 5.097089000  | 2.506934000  | 4.968355000  |
| 6    | 2.351373000  | 7.121686000  | 9.193289000  | 6    | 7.011569000  | 4.742200000  | 6.726681000  |
| 6    | 1.578347000  | 7.666961000  | 10.215434000 | 6    | 5.388695000  | 5.924032000  | 5.167336000  |
| 6    | 0.506983000  | 8.695545000  | 9.914779000  | 6    | 3.201196000  | 1.979685000  | 6.545627000  |
| 6    | -0.197178000 | 8.492071000  | 8.572291000  | 6    | 6.934407000  | 3.462961000  | 3.768980000  |
| 6    | -1.233048000 | 9.579333000  | 8.291768000  | 6    | 5.059792000  | 1.383139000  | 4.164685000  |
| 6    | -2.229997000 | 9.712347000  | 9.433331000  | 6    | 6.917836000  | 2.343528000  | 2.942433000  |
| 6    | -3.139494000 | 8.486256000  | 9.498082000  | 6    | 5.995118000  | 1.320503000  | 3.139304000  |
| 6    | 4.181858000  | 5.691065000  | 8.313266000  | 1    | 3.034400000  | 3.967011000  | 8.053941000  |
| 1    | -4.566472000 | 11.778572000 | 8.463185000  | 1    | 5.032389000  | 6.284959000  | 7.994305000  |
| 1    | -2.407427000 | 11.821033000 | 9.175601000  | 1    | 7.656567000  | 4.255826000  | 3.611270000  |
| 1    | -4.555024000 | 10.687459000 | 10.964322000 | 1    | 7.634262000  | 2.266028000  | 2.133274000  |
| 1    | -3.645524000 | 12.179004000 | 11.161967000 | 1    | 6.002361000  | 0.458364000  | 2.483439000  |
| 1    | -2.979670000 | 9.490283000  | 12.207451000 | 1    | 4.346074000  | 0.583333000  | 4.310888000  |
| 1    | -2.120647000 | 10.985027000 | 12.541922000 | 1    | 3.167857000  | 1.083719000  | 5.935219000  |
| 1    | -0.830140000 | 10.841467000 | 10.549698000 | 1    | 3.388208000  | 1.702933000  | 7.582422000  |
| 1    | -1.061088000 | 7.887062000  | 11.150092000 | 1    | 2.248992000  | 2.502842000  | 6.466157000  |
| 1    | -0.439543000 | 9.241697000  | 13.187156000 | 1    | 4.500066000  | 5.804758000  | 4.545475000  |
| 1    | 0.909617000  | 9.905331000  | 12.271675000 | 1    | 6.216412000  | 6.245788000  | 4.533991000  |
| 1    | 0.393762000  | 6.998610000  | 13.030002000 | 1    | 5.198107000  | 6.700346000  | 5.907610000  |
| 1    | 1.745960000  | 7.983623000  | 13.540093000 | 1    | 7.854357000  | 5.036828000  | 6.099900000  |
| 1    | 1.014848000  | 9.671790000  | 9.855257000  | 1    | 7.254256000  | 3.796653000  | 7.214319000  |
| 1    | -0.665748000 | 7.502276000  | 8.557855000  | 1    | 6.868323000  | 5.505268000  | 7.490551000  |
| 1    | 0.532370000  | 8.497435000  | 7.759608000  | 1    | 4.803261000  | 4.853733000  | 11.907937000 |

**Table S26.** Optimized geometry of the protonated cationic form **TTTH** of spiropyran (**3**). The bond lengths and Cartesian coordinates of the atoms are given in Angstroms, the torsion angles - in degrees.

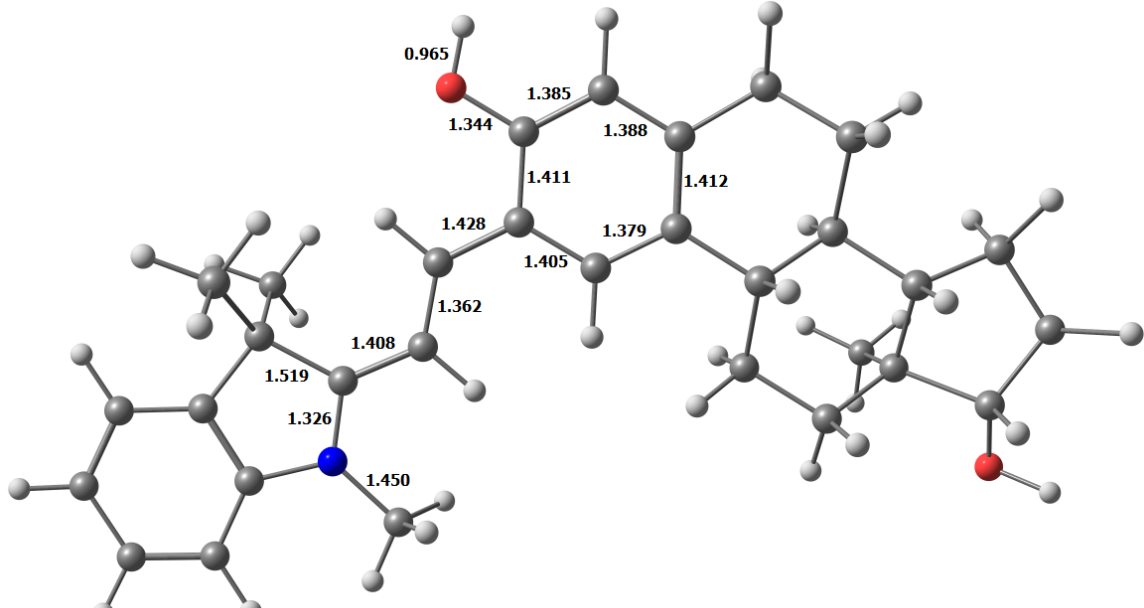

| Atom | X            | Y            | Z            | Atom | X            | Y           | Z            |
|------|--------------|--------------|--------------|------|--------------|-------------|--------------|
| 8    | -4.826273000 | 9.326860000  | 9.026058000  | 1    | -2.429964000 | 7.847478000 | 7.860792000  |
| 8    | 5.437362000  | 6.191109000  | 10.823245000 | 1    | -1.587883000 | 9.394227000 | 7.896259000  |
| 6    | -3.655584000 | 9.920671000  | 9.556264000  | 1    | -3.552212000 | 7.945661000 | 11.428840000 |
| 6    | -3.837722000 | 10.554095000 | 10.947989000 | 1    | -3.797741000 | 7.163279000 | 9.868388000  |
| 6    | -2.488817000 | 10.364643000 | 11.674933000 | 1    | -2.268799000 | 6.968942000 | 10.723926000 |
| 6    | -1.583782000 | 9.756072000  | 10.604534000 | 1    | 4.117830000  | 7.757008000 | 12.474030000 |
| 6    | -0.327155000 | 9.016079000  | 11.007875000 | 1    | 1.877476000  | 6.925056000 | 8.176460000  |
| 6    | 0.606719000  | 9.843784000  | 11.871767000 | 6    | 3.789371000  | 5.307374000 | 7.178000000  |
| 6    | 1.767815000  | 8.995299000  | 12.352670000 | 6    | 4.500056000  | 4.495047000 | 6.273096000  |
| 6    | 2.385821000  | 8.151713000  | 11.276714000 | 6    | 5.883736000  | 3.885297000 | 6.417030000  |
| 6    | 3.621025000  | 7.570740000  | 11.525891000 | 7    | 3.985856000  | 4.161119000 | 5.097589000  |
| 6    | 4.240314000  | 6.757372000  | 10.592192000 | 6    | 6.022303000  | 3.168961000 | 5.100575000  |
| 6    | 3.608137000  | 6.505295000  | 9.356518000  | 6    | 4.870956000  | 3.359781000 | 4.351184000  |
| 6    | 2.358889000  | 7.106005000  | 9.128356000  | 6    | 5.943505000  | 2.874749000 | 7.570788000  |
| 6    | 1.731486000  | 7.920663000  | 10.047139000 | 6    | 6.967278000  | 4.963229000 | 6.553101000  |
| 6    | 0.411058000  | 8.591104000  | 9.731329000  | 6    | 2.674627000  | 4.559893000 | 4.623560000  |
| 6    | -0.485000000 | 7.779598000  | 8.794092000  | 6    | 7.057102000  | 2.410594000 | 4.594361000  |
| 6    | -1.800192000 | 8.491659000  | 8.482656000  | 6    | 4.701387000  | 2.818481000 | 3.090079000  |
| 6    | -2.531126000 | 8.904319000  | 9.751334000  | 6    | 6.911448000  | 1.852905000 | 3.326880000  |
| 6    | -3.063259000 | 7.678001000  | 10.490494000 | 6    | 5.750481000  | 2.056608000 | 2.588608000  |
| 6    | 4.265036000  | 5.672794000  | 8.400345000  | 1    | 2.813097000  | 5.650922000 | 6.860445000  |
| 1    | -5.462511000 | 10.027258000 | 8.853809000  | 1    | 5.237266000  | 5.312791000 | 8.707769000  |
| 1    | -3.290393000 | 10.682698000 | 8.853643000  | 1    | 7.963096000  | 2.251212000 | 5.168262000  |
| 1    | -4.648306000 | 10.037874000 | 11.467895000 | 1    | 7.711926000  | 1.253440000 | 2.909868000  |
| 1    | -4.123079000 | 11.605007000 | 10.868673000 | 1    | 5.656911000  | 1.614310000 | 1.603967000  |
| 1    | -2.593704000 | 9.682942000  | 12.523612000 | 1    | 3.802595000  | 2.969192000 | 2.506370000  |
| 1    | -2.090783000 | 11.302337000 | 12.065793000 | 1    | 2.501173000  | 4.121386000 | 3.646578000  |
| 1    | -1.258555000 | 10.582755000 | 9.953456000  | 1    | 1.908133000  | 4.207183000 | 5.313654000  |
| 1    | -0.601494000 | 8.115281000  | 11.574248000 | 1    | 2.623199000  | 5.645975000 | 4.541393000  |
| 1    | 0.073967000  | 10.253553000 | 12.733137000 | 1    | 6.904836000  | 5.682320000 | 5.734533000  |
| 1    | 0.972823000  | 10.695761000 | 11.286364000 | 1    | 7.945318000  | 4.480959000 | 6.517411000  |
| 1    | 1.414179000  | 8.315703000  | 13.138926000 | 1    | 6.883806000  | 5.500304000 | 7.497418000  |
| 1    | 2.544611000  | 9.608371000  | 12.818390000 | 1    | 6.904013000  | 2.358716000 | 7.531354000  |
| 1    | 0.650707000  | 9.529966000  | 9.207236000  | 1    | 5.147723000  | 2.133417000 | 7.480154000  |
| 1    | -0.676433000 | 6.798891000  | 9.242161000  | 1    | 5.857446000  | 3.362931000 | 8.541033000  |
| 1    | 0.031216000  | 7.589309000  | 7.850384000  | 1    | 5.758287000  | 6.443849000 | 11.697461000 |

**Table S27.** Optimized geometry of the protonated form **CCCH\*TFA** of spiropyran (**3**) with TFA anion. The bond lengths and Cartesian coordinates of the atoms are given in Angstroms, the torsion angles - in degrees.

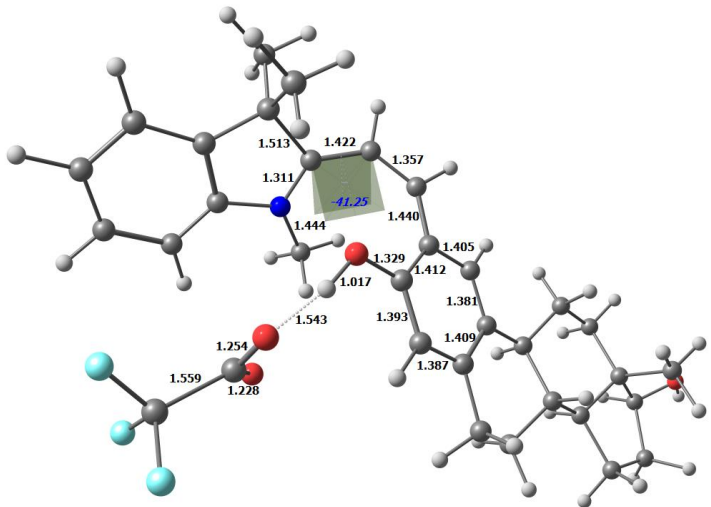

| Atom | X            | Y            | Z            | Atom | X            | Y           | Z            |
|------|--------------|--------------|--------------|------|--------------|-------------|--------------|
| 8    | -5.199429000 | 9.540383000  | 11.106857000 | 1    | -1.892695000 | 7.853357000 | 12.209017000 |
| 8    | 4.716985000  | 5.672223000  | 8.887697000  | 1    | 4.311865000  | 8.051622000 | 9.896457000  |
| 6    | -3.995198000 | 10.073868000 | 10.586015000 | 1    | 0.262449000  | 5.742509000 | 8.375275000  |
| 6    | -3.477750000 | 11.318245000 | 11.331379000 | 6    | 3.258951000  | 3.563960000 | 7.267449000  |
| 6    | -1.937590000 | 11.243478000 | 11.253049000 | 6    | 4.574744000  | 3.853049000 | 6.811335000  |
| 6    | -1.677149000 | 10.030938000 | 10.360171000 | 6    | 5.703067000  | 2.848244000 | 6.887788000  |
| 6    | -0.328566000 | 9.344545000  | 10.389807000 | 7    | 4.983543000  | 4.947874000 | 6.216593000  |
| 6    | 0.835898000  | 10.276121000 | 10.104542000 | 6    | 6.838632000  | 3.637868000 | 6.301954000  |
| 6    | 2.150458000  | 9.548323000  | 10.312513000 | 6    | 6.361636000  | 4.880124000 | 5.912477000  |
| 6    | 2.189165000  | 8.188139000  | 9.673510000  | 6    | 5.376980000  | 1.614761000 | 6.033811000  |
| 6    | 3.414970000  | 7.553463000  | 9.543081000  | 6    | 5.959031000  | 2.443225000 | 8.341802000  |
| 6    | 3.543712000  | 6.290849000  | 8.969656000  | 6    | 4.183400000  | 6.093299000 | 5.852329000  |
| 6    | 2.379966000  | 5.636961000  | 8.508502000  | 6    | 8.169137000  | 3.326310000 | 6.111420000  |
| 6    | 1.145208000  | 6.277831000  | 8.705211000  | 6    | 7.154892000  | 5.849693000 | 5.332344000  |
| 6    | 1.012542000  | 7.539417000  | 9.250094000  | 6    | 8.995727000  | 4.287225000 | 5.533737000  |
| 6    | -0.337328000 | 8.219257000  | 9.346990000  | 6    | 8.495389000  | 5.527822000 | 5.151022000  |
| 6    | -1.504999000 | 7.253704000  | 9.556872000  | 1    | 2.973806000  | 2.528880000 | 7.101174000  |
| 6    | -2.850805000 | 7.972538000  | 9.627983000  | 1    | 1.370494000  | 3.847348000 | 8.013236000  |
| 6    | -2.839499000 | 9.078724000  | 10.671899000 | 1    | 8.564595000  | 2.360925000 | 6.406421000  |
| 6    | -2.769076000 | 8.488400000  | 12.079709000 | 1    | 10.045870000 | 4.067082000 | 5.382106000  |
| 6    | 2.338312000  | 4.331800000  | 7.902395000  | 1    | 9.160111000  | 6.260418000 | 4.709181000  |
| 1    | -5.900929000 | 10.177788000 | 10.943490000 | 1    | 6.765946000  | 6.819110000 | 5.050791000  |
| 1    | -4.140490000 | 10.317800000 | 9.524449000  | 1    | 3.131767000  | 5.829785000 | 5.912714000  |
| 1    | -3.827782000 | 11.278872000 | 12.365705000 | 1    | 4.407652000  | 6.923950000 | 6.524228000  |
| 1    | -3.873157000 | 12.235633000 | 10.890903000 | 1    | 4.437232000  | 6.377854000 | 4.831599000  |
| 1    | -1.502967000 | 11.091390000 | 12.245084000 | 1    | 6.162670000  | 3.317864000 | 8.959904000  |
| 1    | -1.496210000 | 12.154761000 | 10.846560000 | 1    | 6.818910000  | 1.772411000 | 8.378526000  |
| 1    | -1.833234000 | 10.359813000 | 9.320674000  | 1    | 5.090015000  | 1.920524000 | 8.745477000  |
| 1    | -0.168947000 | 8.903487000  | 11.383734000 | 1    | 6.242312000  | 0.950104000 | 6.035424000  |
| 1    | 0.797382000  | 11.155591000 | 10.752223000 | 1    | 5.152555000  | 1.895073000 | 5.003303000  |
| 1    | 0.759235000  | 10.636105000 | 9.071176000  | 1    | 4.526226000  | 1.074131000 | 6.451417000  |
| 1    | 2.319654000  | 9.419210000  | 11.389117000 | 1    | 5.505161000  | 6.296693000 | 9.038032000  |
| 1    | 2.994057000  | 10.140589000 | 9.946766000  | 8    | 6.847865000  | 7.048536000 | 9.153500000  |
| 1    | -0.513857000 | 8.719300000  | 8.381066000  | 8    | 6.225854000  | 8.369410000 | 7.441085000  |
| 1    | -1.331494000 | 6.675286000  | 10.470381000 | 6    | 7.021607000  | 7.901211000 | 8.250149000  |
| 1    | -1.545034000 | 6.530611000  | 8.739319000  | 6    | 8.485355000  | 8.435710000 | 8.195922000  |
| 1    | -3.646488000 | 7.249587000  | 9.834607000  | 9    | 9.383168000  | 7.439976000 | 8.187979000  |
| 1    | -3.068932000 | 8.419034000  | 8.649753000  | 9    | 8.726053000  | 9.185816000 | 7.117853000  |
| 1    | -2.733816000 | 9.262838000  | 12.847943000 | 9    | 8.752149000  | 9.194391000 | 9.273899000  |
| 1    | -3.654723000 | 7.877931000  | 12.266109000 |      |              |             |              |



**Table S28.** Optimized geometry of the protonated form **TCCH\*TFA** of spiropyran (**3**) with TFA anion. The bond lengths and Cartesian coordinates of the atoms are given in Angstroms, the torsion angles - in degrees.

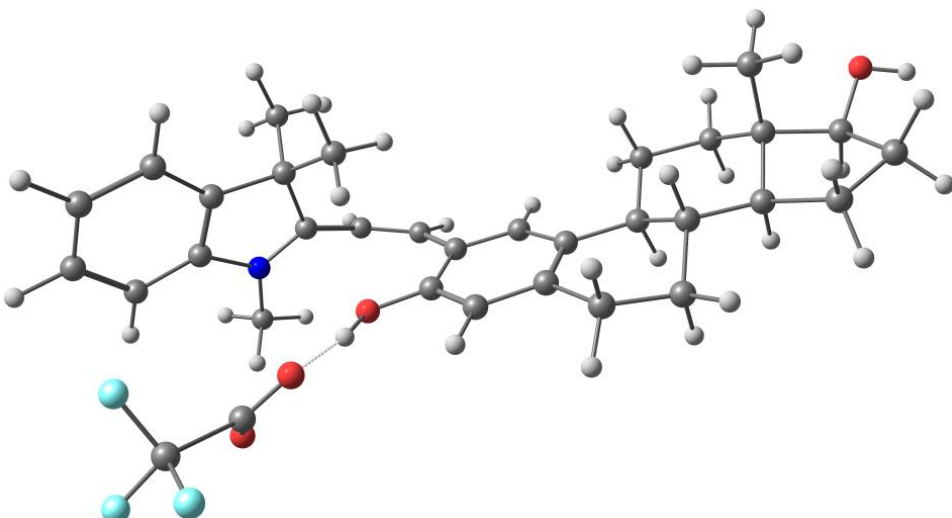

| Atom | X            | Y            | Z            | Atom | X            | Y           | Z            |
|------|--------------|--------------|--------------|------|--------------|-------------|--------------|
| 8    | -4.205770000 | 8.337644000  | 13.016238000 | 1    | -0.530195000 | 7.432875000 | 12.215372000 |
| 8    | 3.742646000  | 6.692544000  | 5.745912000  | 1    | 3.489669000  | 8.934553000 | 7.109912000  |
| 6    | -3.557831000 | 9.099369000  | 12.013298000 | 1    | -0.242643000 | 5.778469000 | 7.546769000  |
| 6    | -3.007355000 | 10.452145000 | 12.501769000 | 6    | 2.609059000  | 4.025959000 | 5.561494000  |
| 6    | -1.729285000 | 10.709412000 | 11.675151000 | 6    | 4.044809000  | 4.142603000 | 5.741000000  |
| 6    | -1.702753000 | 9.552013000  | 10.678088000 | 6    | 4.790398000  | 3.885729000 | 7.033048000  |
| 6    | -0.408926000 | 9.171762000  | 9.991211000  | 7    | 4.886291000  | 4.219974000 | 4.750162000  |
| 6    | 0.266936000  | 10.324749000 | 9.272679000  | 6    | 6.215670000  | 4.016556000 | 6.577735000  |
| 6    | 1.625834000  | 9.888223000  | 8.758734000  | 6    | 6.226043000  | 4.185578000 | 5.202070000  |
| 6    | 1.594434000  | 8.567072000  | 8.041295000  | 6    | 4.487965000  | 2.417370000 | 7.407247000  |
| 6    | 2.672353000  | 8.229891000  | 7.229140000  | 6    | 4.424655000  | 4.790796000 | 8.203113000  |
| 6    | 2.733733000  | 7.017424000  | 6.556176000  | 6    | 4.550495000  | 4.429439000 | 3.358657000  |
| 6    | 1.675408000  | 6.102527000  | 6.700807000  | 6    | 7.410566000  | 3.968859000 | 7.266987000  |
| 6    | 0.581889000  | 6.479988000  | 7.483802000  | 6    | 7.380872000  | 4.305073000 | 4.456835000  |
| 6    | 0.514543000  | 7.680412000  | 8.176122000  | 6    | 8.593711000  | 4.088612000 | 6.542354000  |
| 6    | -0.709158000 | 8.049188000  | 8.990257000  | 6    | 8.578635000  | 4.252717000 | 5.160629000  |
| 6    | -1.384775000 | 6.856768000  | 9.671245000  | 1    | 2.316121000  | 3.138155000 | 5.004559000  |
| 6    | -2.631506000 | 7.261846000  | 10.457064000 | 1    | 0.623810000  | 4.436456000 | 5.873837000  |
| 6    | -2.335095000 | 8.382094000  | 11.443616000 | 1    | 7.431085000  | 3.841261000 | 8.343221000  |
| 6    | -1.456680000 | 7.872012000  | 12.585108000 | 1    | 9.543417000  | 4.057082000 | 7.063312000  |
| 6    | 1.630863000  | 4.813039000  | 6.036183000  | 1    | 9.514020000  | 4.349134000 | 4.622712000  |
| 1    | -5.002450000 | 8.807992000  | 13.279079000 | 1    | 7.362043000  | 4.444620000 | 3.383680000  |
| 1    | -4.257479000 | 9.268992000  | 11.182988000 | 1    | 3.470465000  | 4.413247000 | 3.245397000  |
| 1    | -2.785301000 | 10.377005000 | 13.569062000 | 1    | 4.943284000  | 5.402194000 | 3.057333000  |
| 1    | -3.747435000 | 11.245772000 | 12.381105000 | 1    | 5.006927000  | 3.643177000 | 2.757323000  |
| 1    | -0.840808000 | 10.691567000 | 12.312769000 | 1    | 4.676024000  | 5.829287000 | 7.998573000  |
| 1    | -1.744628000 | 11.679811000 | 11.176544000 | 1    | 4.987221000  | 4.458558000 | 9.077348000  |
| 1    | -2.415729000 | 9.803614000  | 9.877258000  | 1    | 3.361439000  | 4.714995000 | 8.431095000  |
| 1    | 0.297203000  | 8.791009000  | 10.742263000 | 1    | 5.092973000  | 2.152620000 | 8.275291000  |
| 1    | 0.384921000  | 11.180878000 | 9.942001000  | 1    | 4.732273000  | 1.739012000 | 6.587830000  |
| 1    | -0.368638000 | 10.653611000 | 8.441093000  | 1    | 3.432476000  | 2.307761000 | 7.661071000  |
| 1    | 2.313879000  | 9.795248000  | 9.608891000  | 1    | 4.543071000  | 7.312206000 | 5.799629000  |
| 1    | 2.062841000  | 10.645348000 | 8.101664000  | 6    | 7.996042000  | 8.453950000 | 4.830758000  |
| 1    | -1.447375000 | 8.469781000  | 8.288127000  | 9    | 8.720912000  | 7.664682000 | 5.641181000  |
| 1    | -0.660604000 | 6.364761000  | 10.329417000 | 9    | 8.610611000  | 8.470099000 | 3.645551000  |
| 1    | -1.675084000 | 6.112594000  | 8.926463000  | 9    | 8.068054000  | 9.697785000 | 5.329554000  |
| 1    | -3.044399000 | 6.388332000  | 10.971969000 | 8    | 6.133399000  | 7.551525000 | 3.650726000  |
| 1    | -3.397570000 | 7.610349000  | 9.753062000  | 8    | 5.920548000  | 8.028427000 | 5.840346000  |
| 1    | -1.190964000 | 8.666368000  | 13.284899000 | 6    | 6.522939000  | 7.955728000 | 4.742751000  |
| 1    | -1.990201000 | 7.101689000  | 13.145135000 |      |              |             |              |

**Table S29.** Optimized geometry of the protonated form **TTCH\*TFA** of spiropyran (**3**) with TFA anion. The bond lengths and Cartesian coordinates of the atoms are given in Angstroms, the torsion angles - in degrees.

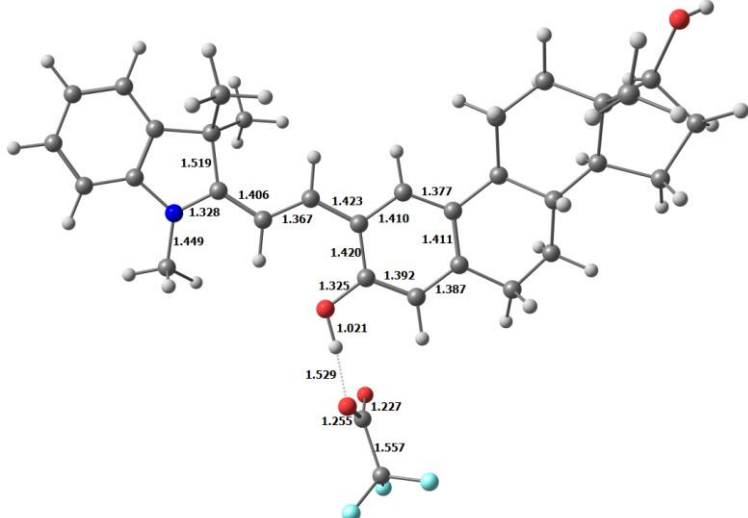

| Atom | X            | Y           | Z           | Atom | X            | Y            | Z            |
|------|--------------|-------------|-------------|------|--------------|--------------|--------------|
| 8    | -7.840603000 | 1.754218000 | 7.719844000 | 1    | -4.960446000 | 4.181782000  | 8.615076000  |
| 8    | 2.158319000  | 5.716061000 | 6.106991000 | 1    | -0.005478000 | 6.855888000  | 5.182403000  |
| 6    | -7.151946000 | 2.365735000 | 6.643259000 | 1    | -0.682173000 | 2.348316000  | 7.000589000  |
| 6    | -7.862700000 | 3.598583000 | 6.055812000 | 6    | 3.113765000  | 3.281069000  | 7.246025000  |
| 6    | -6.738667000 | 4.544716000 | 5.581931000 | 6    | 4.030046000  | 2.369616000  | 7.800568000  |
| 6    | -5.461325000 | 3.740905000 | 5.820880000 | 6    | 3.780070000  | 1.008514000  | 8.427603000  |
| 6    | -4.129330000 | 4.451350000 | 5.924630000 | 7    | 5.328870000  | 2.643906000  | 7.839381000  |
| 6    | -3.809556000 | 5.335790000 | 4.733523000 | 6    | 5.175543000  | 0.612166000  | 8.829541000  |
| 6    | -2.549305000 | 6.134142000 | 5.007964000 | 6    | 6.060562000  | 1.613974000  | 8.459074000  |
| 6    | -1.427507000 | 5.310557000 | 5.572008000 | 6    | 3.228460000  | 0.009759000  | 7.400705000  |
| 6    | -0.154111000 | 5.859105000 | 5.582761000 | 6    | 2.880346000  | 1.103840000  | 9.665966000  |
| 6    | 0.947231000  | 5.178478000 | 6.093624000 | 6    | 5.933203000  | 3.849684000  | 7.309401000  |
| 6    | 0.750553000  | 3.871723000 | 6.612029000 | 6    | 5.641284000  | -0.521417000 | 9.461937000  |
| 6    | -0.558033000 | 3.346904000 | 6.597548000 | 6    | 7.419871000  | 1.535542000  | 8.700557000  |
| 6    | -1.651295000 | 4.021436000 | 6.100289000 | 6    | 7.006443000  | -0.625605000 | 9.716917000  |
| 6    | -3.029415000 | 3.393397000 | 6.078319000 | 6    | 7.879264000  | 0.389429000  | 9.340344000  |
| 6    | -3.298957000 | 2.463231000 | 7.263378000 | 1    | 3.501746000  | 4.219146000  | 6.880019000  |
| 6    | -4.691186000 | 1.835205000 | 7.209323000 | 1    | 1.399429000  | 2.087270000  | 7.510030000  |
| 6    | -5.777642000 | 2.889648000 | 7.057771000 | 1    | 4.962101000  | -1.313651000 | 9.756456000  |
| 6    | -5.906171000 | 3.717063000 | 8.336397000 | 1    | 7.393401000  | -1.506679000 | 10.214974000 |
| 6    | 1.772368000  | 3.038501000 | 7.148480000 | 1    | 8.938036000  | 0.290772000  | 9.548409000  |
| 1    | -8.664427000 | 1.394779000 | 7.377292000 | 1    | 8.107707000  | 2.320491000  | 8.414238000  |
| 1    | -6.995823000 | 1.621923000 | 5.849277000 | 1    | 5.673084000  | 3.961740000  | 6.256880000  |
| 1    | -8.469611000 | 4.060580000 | 6.838250000 | 1    | 5.582875000  | 4.719790000  | 7.865971000  |
| 1    | -8.539323000 | 3.316223000 | 5.246716000 | 1    | 7.011979000  | 3.776294000  | 7.401493000  |
| 1    | -6.730757000 | 5.466807000 | 6.169902000 | 1    | 3.276456000  | 1.828506000  | 10.379386000 |
| 1    | -6.851048000 | 4.834142000 | 4.535887000 | 1    | 2.844907000  | 0.125808000  | 10.148521000 |
| 1    | -5.369128000 | 3.029117000 | 4.985445000 | 1    | 1.863420000  | 1.393448000  | 9.403650000  |
| 1    | -4.131907000 | 5.089718000 | 6.819331000 | 1    | 3.199455000  | -0.980597000 | 7.857955000  |
| 1    | -4.636163000 | 6.019045000 | 4.523418000 | 1    | 3.870715000  | -0.034258000 | 6.519534000  |
| 1    | -3.678137000 | 4.708350000 | 3.843537000 | 1    | 2.218787000  | 0.270214000  | 7.084560000  |
| 1    | -2.777786000 | 6.924891000 | 5.734220000 | 1    | 2.161468000  | 6.664094000  | 5.728054000  |
| 1    | -2.197345000 | 6.648280000 | 4.109213000 | 8    | 2.247866000  | 8.114941000  | 5.254593000  |
| 1    | -3.087732000 | 2.773614000 | 5.169345000 | 8    | 2.217072000  | 7.419869000  | 3.115547000  |
| 1    | -3.169546000 | 3.026406000 | 8.193598000 | 6    | 2.210854000  | 8.260737000  | 4.008817000  |
| 1    | -2.560075000 | 1.659195000 | 7.286602000 | 6    | 2.086745000  | 9.751672000  | 3.577209000  |
| 1    | -4.858188000 | 1.229925000 | 8.106069000 | 9    | 2.881321000  | 10.558327000 | 4.292335000  |
| 1    | -4.741266000 | 1.155226000 | 6.349675000 | 9    | 2.381697000  | 9.947709000  | 2.290052000  |
| 1    | -6.648527000 | 4.511045000 | 8.237870000 | 9    | 0.822787000  | 10.176838000 | 3.761802000  |
| 1    | -6.217419000 | 3.072680000 | 9.160705000 |      |              |              |              |

**Table S30.** Optimized geometry of the protonated form **TTTH\*TFA** of spiropyran (**3**) with TFA anion. The bond lengths and Cartesian coordinates of the atoms are given in Angstroms, the torsion angles - in degrees.

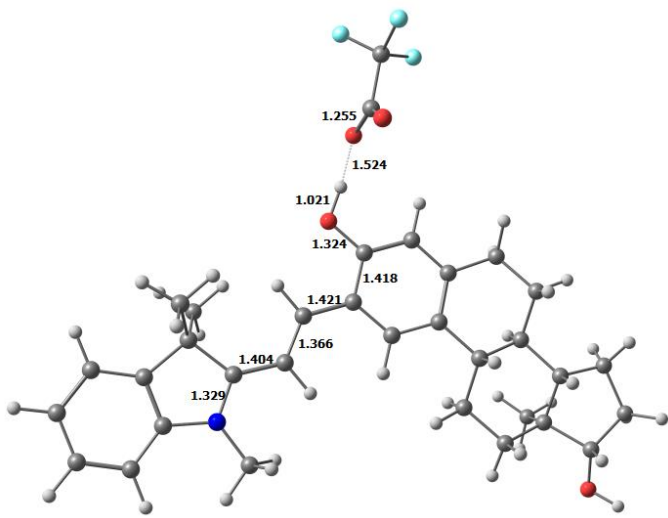

| Atom | X            | Y           | Z           | Atom | X            | Y            | Z            |
|------|--------------|-------------|-------------|------|--------------|--------------|--------------|
| 8    | -7.840603000 | 1.754218000 | 7.719844000 | 1    | -4.960446000 | 4.181782000  | 8.615076000  |
| 8    | 2.158319000  | 5.716061000 | 6.106991000 | 1    | -0.005478000 | 6.855888000  | 5.182403000  |
| 6    | -7.151946000 | 2.365735000 | 6.643259000 | 1    | -0.682173000 | 2.348316000  | 7.000589000  |
| 6    | -7.862700000 | 3.598583000 | 6.055812000 | 6    | 3.113765000  | 3.281069000  | 7.246025000  |
| 6    | -6.738667000 | 4.544716000 | 5.581931000 | 6    | 4.030046000  | 2.369616000  | 7.800568000  |
| 6    | -5.461325000 | 3.740905000 | 5.820880000 | 6    | 3.780070000  | 1.008514000  | 8.427603000  |
| 6    | -4.129330000 | 4.451350000 | 5.924630000 | 7    | 5.328870000  | 2.643906000  | 7.839381000  |
| 6    | -3.809556000 | 5.335790000 | 4.733523000 | 6    | 5.175543000  | 0.612166000  | 8.829541000  |
| 6    | -2.549305000 | 6.134142000 | 5.007964000 | 6    | 6.060562000  | 1.613974000  | 8.459074000  |
| 6    | -1.427507000 | 5.310557000 | 5.572008000 | 6    | 3.228460000  | 0.009759000  | 7.400705000  |
| 6    | -0.154111000 | 5.859105000 | 5.582761000 | 6    | 2.880346000  | 1.103840000  | 9.665966000  |
| 6    | 0.947231000  | 5.178478000 | 6.093624000 | 6    | 5.933203000  | 3.849684000  | 7.309401000  |
| 6    | 0.750553000  | 3.871723000 | 6.612029000 | 6    | 5.641284000  | -0.521417000 | 9.461937000  |
| 6    | -0.558033000 | 3.346904000 | 6.597548000 | 6    | 7.419871000  | 1.535542000  | 8.700557000  |
| 6    | -1.651295000 | 4.021436000 | 6.100289000 | 6    | 7.006443000  | -0.625605000 | 9.716917000  |
| 6    | -3.029415000 | 3.393397000 | 6.078319000 | 6    | 7.879264000  | 0.389429000  | 9.340344000  |
| 6    | -3.298957000 | 2.463231000 | 7.263378000 | 1    | 3.501746000  | 4.219146000  | 6.880019000  |
| 6    | -4.691186000 | 1.835205000 | 7.209323000 | 1    | 1.399429000  | 2.087270000  | 7.510030000  |
| 6    | -5.777642000 | 2.889648000 | 7.057771000 | 1    | 4.962101000  | -1.313651000 | 9.756456000  |
| 6    | -5.906171000 | 3.717063000 | 8.336397000 | 1    | 7.393401000  | -1.506679000 | 10.214974000 |
| 6    | 1.772368000  | 3.038501000 | 7.148480000 | 1    | 8.938036000  | 0.290772000  | 9.548409000  |
| 1    | -8.664427000 | 1.394779000 | 7.377292000 | 1    | 8.107707000  | 2.320491000  | 8.414238000  |
| 1    | -6.995823000 | 1.621923000 | 5.849277000 | 1    | 5.673084000  | 3.961740000  | 6.256880000  |
| 1    | -8.469611000 | 4.060580000 | 6.838250000 | 1    | 5.582875000  | 4.719790000  | 7.865971000  |
| 1    | -8.539323000 | 3.316223000 | 5.246716000 | 1    | 7.011979000  | 3.776294000  | 7.401493000  |
| 1    | -6.730757000 | 5.466807000 | 6.169902000 | 1    | 3.276456000  | 1.828506000  | 10.379386000 |
| 1    | -6.851048000 | 4.834142000 | 4.535887000 | 1    | 2.844907000  | 0.125808000  | 10.148521000 |
| 1    | -5.369128000 | 3.029117000 | 4.985445000 | 1    | 1.863420000  | 1.393448000  | 9.403650000  |
| 1    | -4.131907000 | 5.089718000 | 6.819331000 | 1    | 3.199455000  | -0.980597000 | 7.857955000  |
| 1    | -4.636163000 | 6.019045000 | 4.523418000 | 1    | 3.870715000  | -0.034258000 | 6.519534000  |
| 1    | -3.678137000 | 4.708350000 | 3.843537000 | 1    | 2.218787000  | 0.270214000  | 7.084560000  |
| 1    | -2.777786000 | 6.924891000 | 5.734220000 | 1    | 2.161468000  | 6.664094000  | 5.728054000  |
| 1    | -2.197345000 | 6.648280000 | 4.109213000 | 8    | 2.247866000  | 8.114941000  | 5.254593000  |
| 1    | -3.087732000 | 2.773614000 | 5.169345000 | 8    | 2.217072000  | 7.419869000  | 3.115547000  |
| 1    | -3.169546000 | 3.026406000 | 8.193598000 | 6    | 2.210854000  | 8.260737000  | 4.008817000  |
| 1    | -2.560075000 | 1.659195000 | 7.286602000 | 6    | 2.086745000  | 9.751672000  | 3.577209000  |
| 1    | -4.858188000 | 1.229925000 | 8.106069000 | 9    | 2.881321000  | 10.558327000 | 4.292335000  |
| 1    | -4.741266000 | 1.155226000 | 6.349675000 | 9    | 2.381697000  | 9.947709000  | 2.290052000  |
| 1    | -6.648527000 | 4.511045000 | 8.237870000 | 9    | 0.822787000  | 10.176838000 | 3.761802000  |
| 1    | -6.217419000 | 3.072680000 | 9.160705000 |      |              |              |              |

**Table S31.** Gibbs free energies (**G**, a.u.) of cyclic isomer **Sp**, trifluoroacetic acid (**TFA**) and some protonated **McH** forms of compound (**3**) with TFA anion, and calculated  $\Delta G$  (kcal/mol) of protonation reaction according to the PBE0-D3/def2-TZVP calculations in acetonitrile solutions.

| Isomer          | G, a.u.        | $\Delta G$ ,<br>kcal/mol |
|-----------------|----------------|--------------------------|
| <b>Sp</b>       | -1407.19203162 | -                        |
| <b>TFA</b>      | -526.51557402  | -                        |
| <b>CCCH*TFA</b> | -1933.71079770 | -2.0                     |
| <b>TCCH*TFA</b> | -1933.70440392 | 2.0                      |
| <b>TTCH*TFA</b> | -1933.71742607 | -6.2                     |
| <b>TTTH*TFA</b> | -1933.71830021 | -6.7                     |
